# Supplementary figures and images for: Effect of Fungicide Treatment on Multi-Mycotoxin Occurrence in French Wheat during a 4-Year Period
Source: MDPI journal article supplement (doi:10.3390/toxins15070443), 2023-07-04

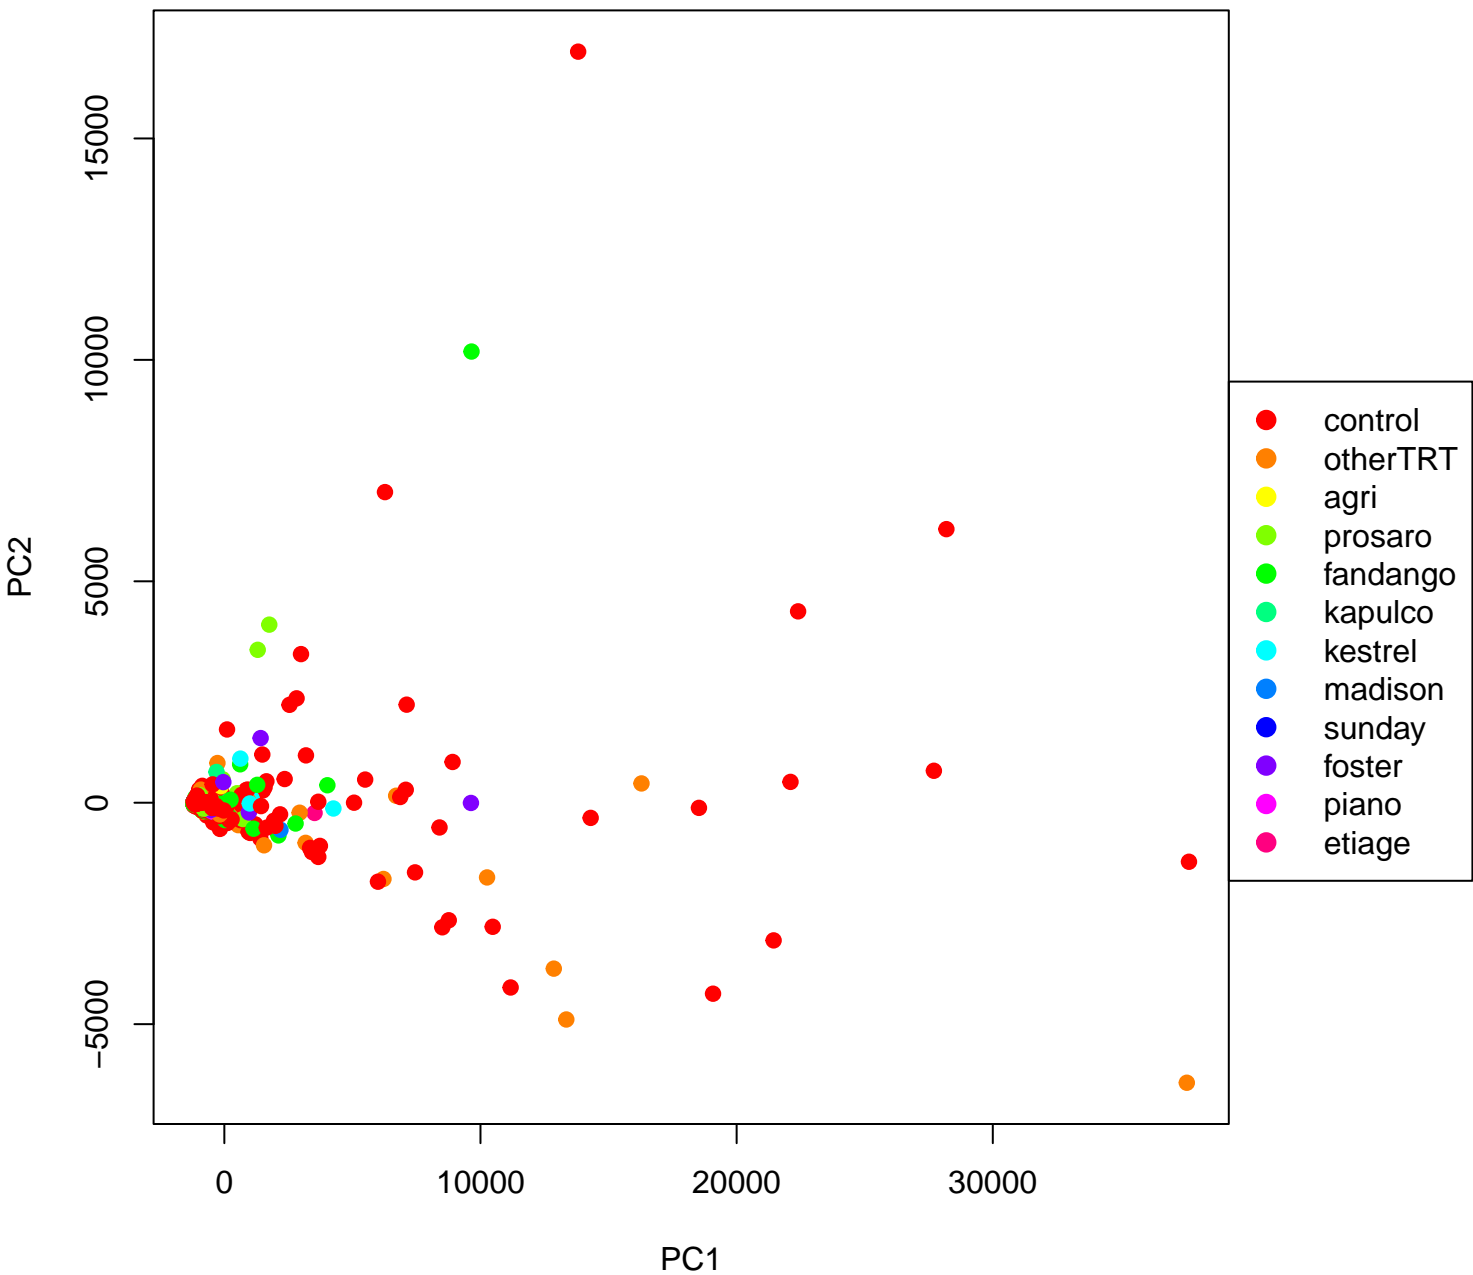

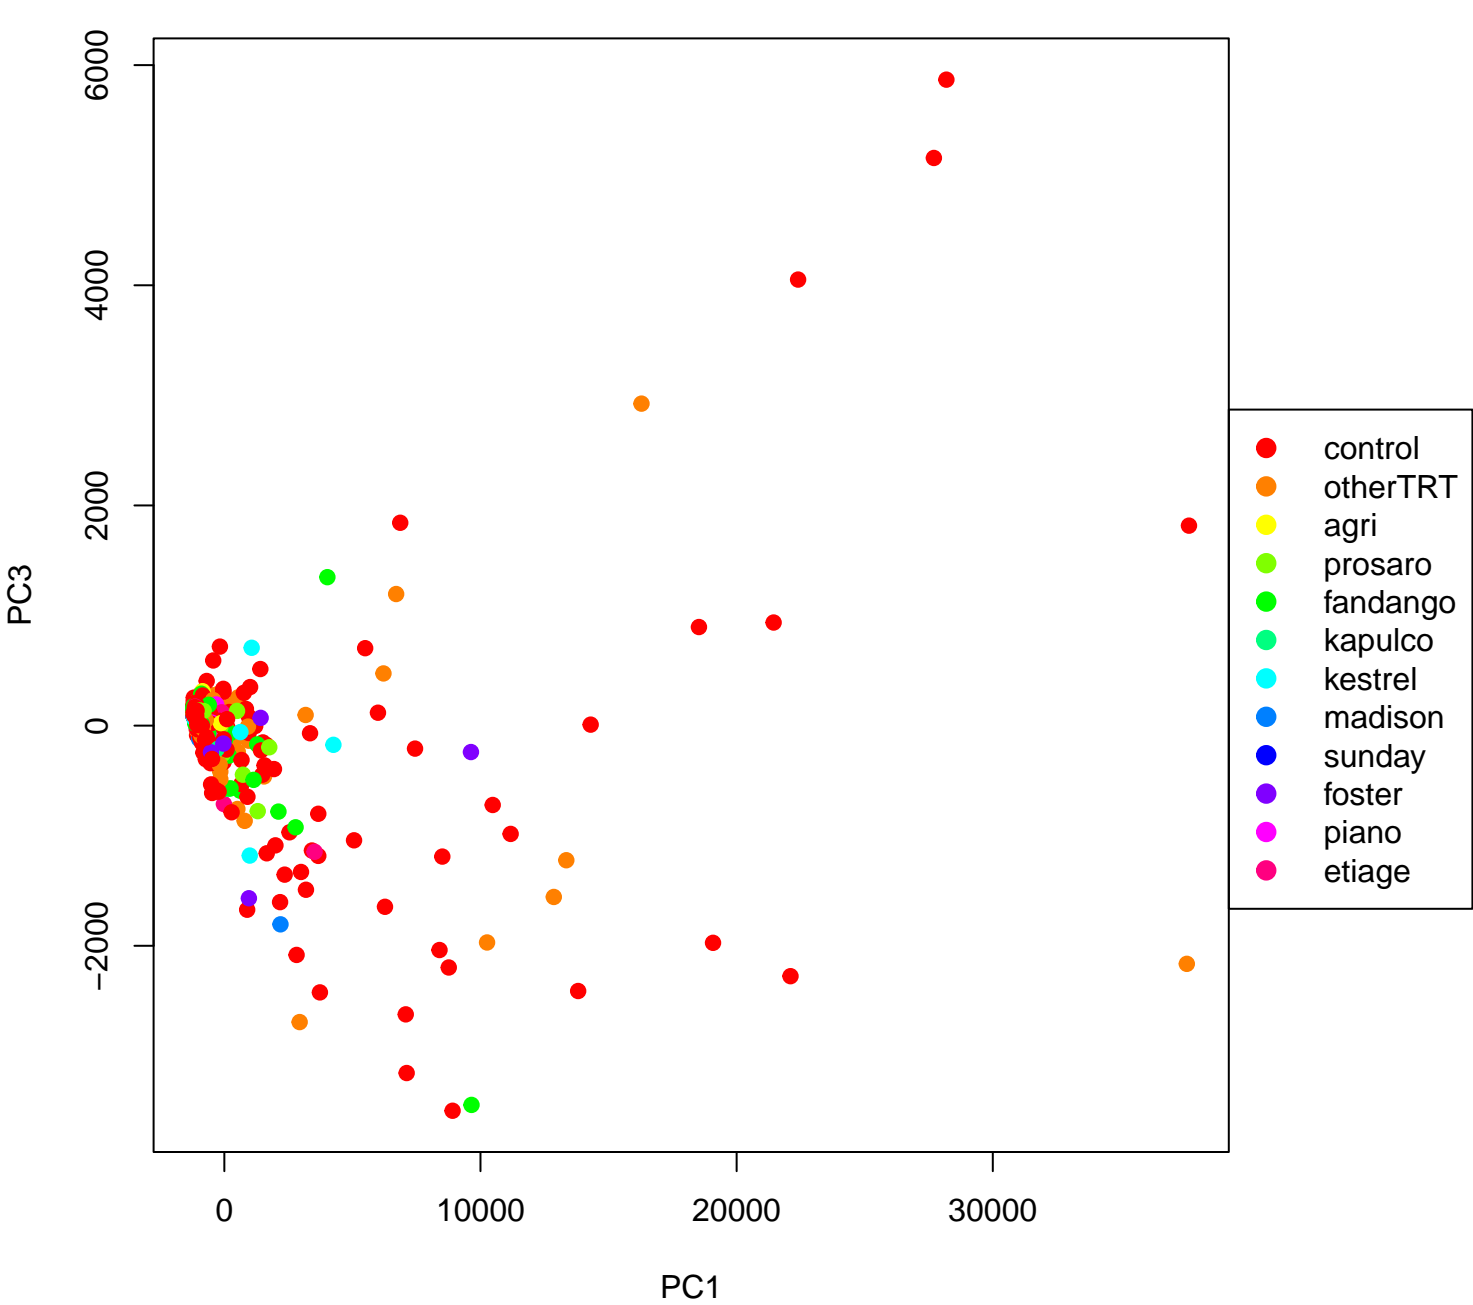

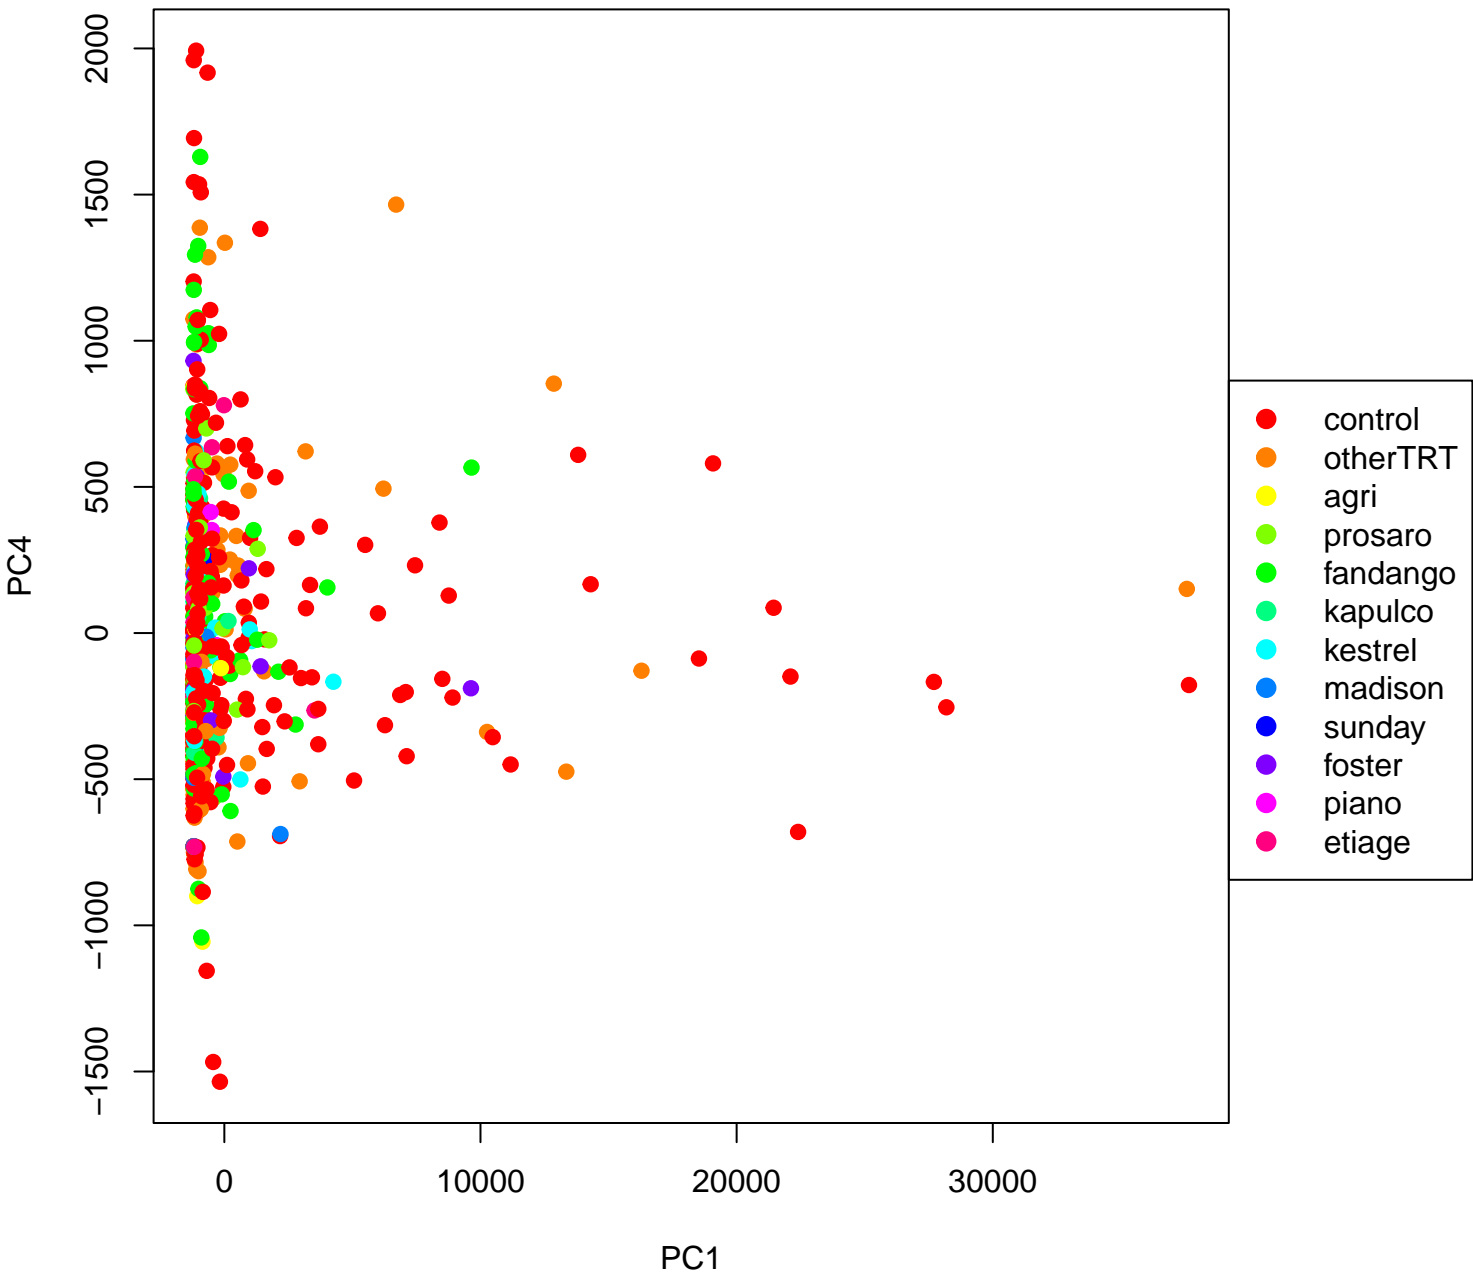

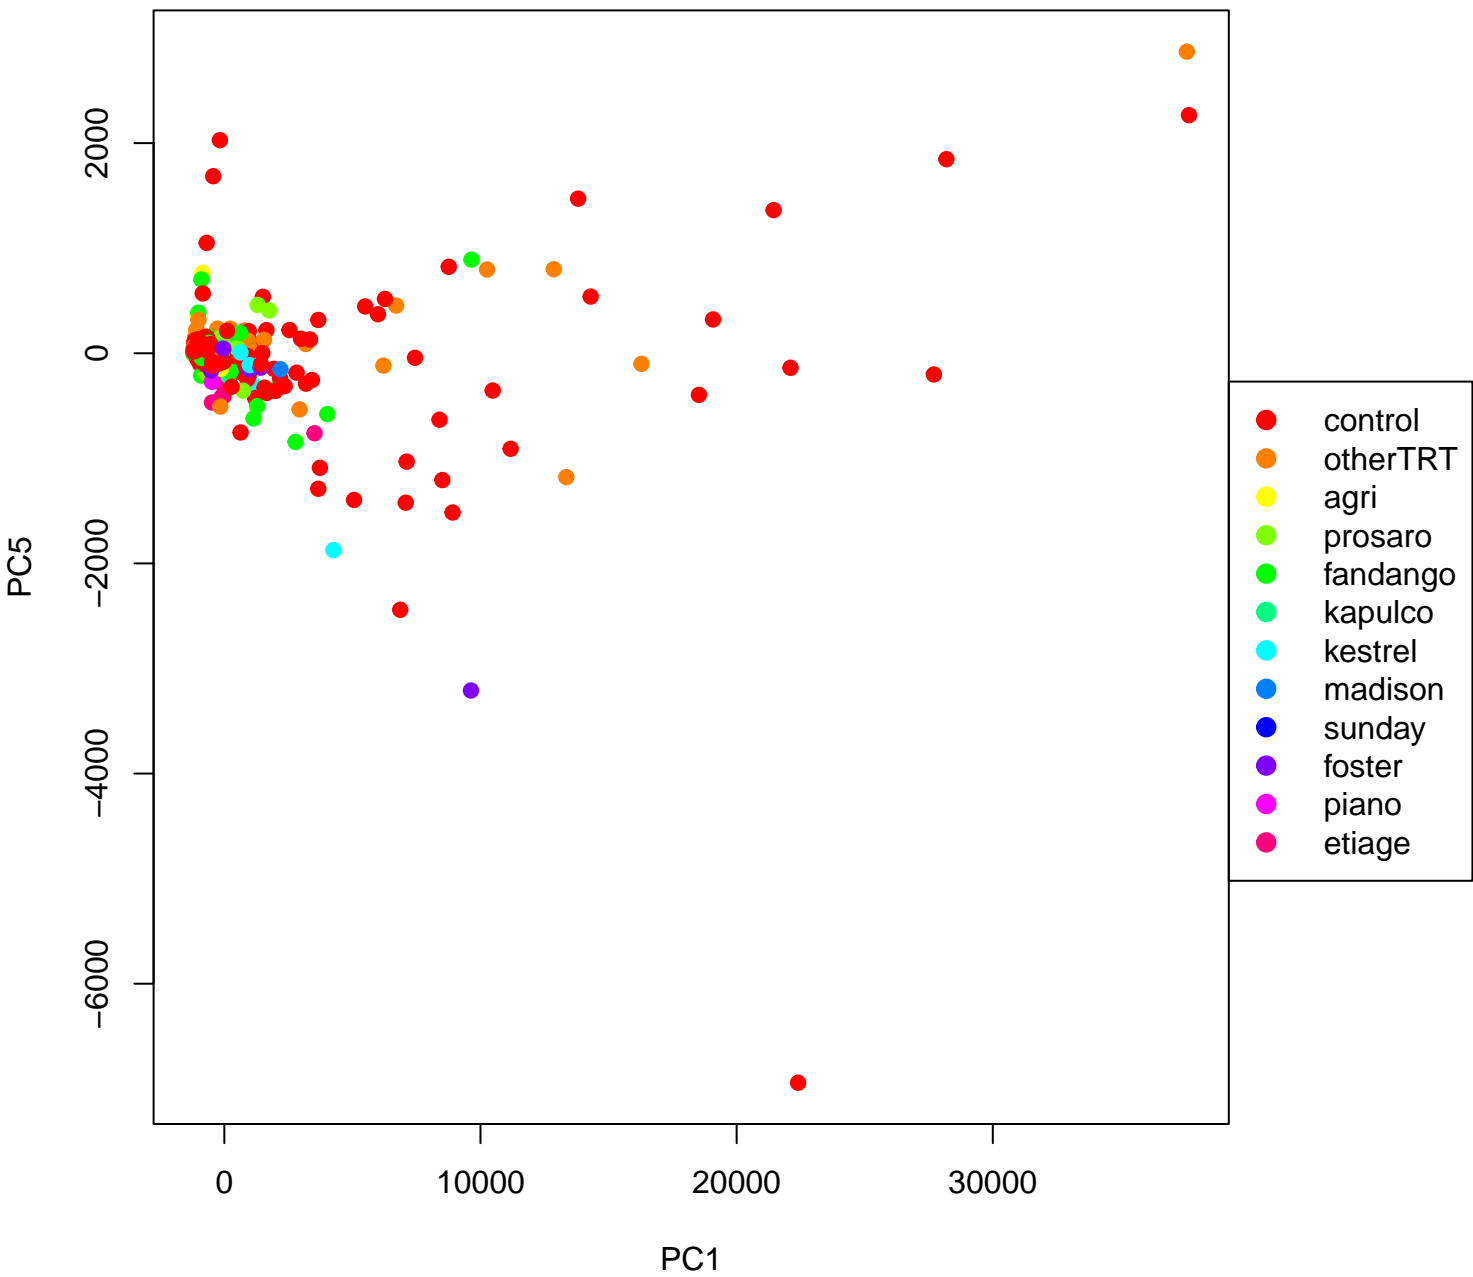

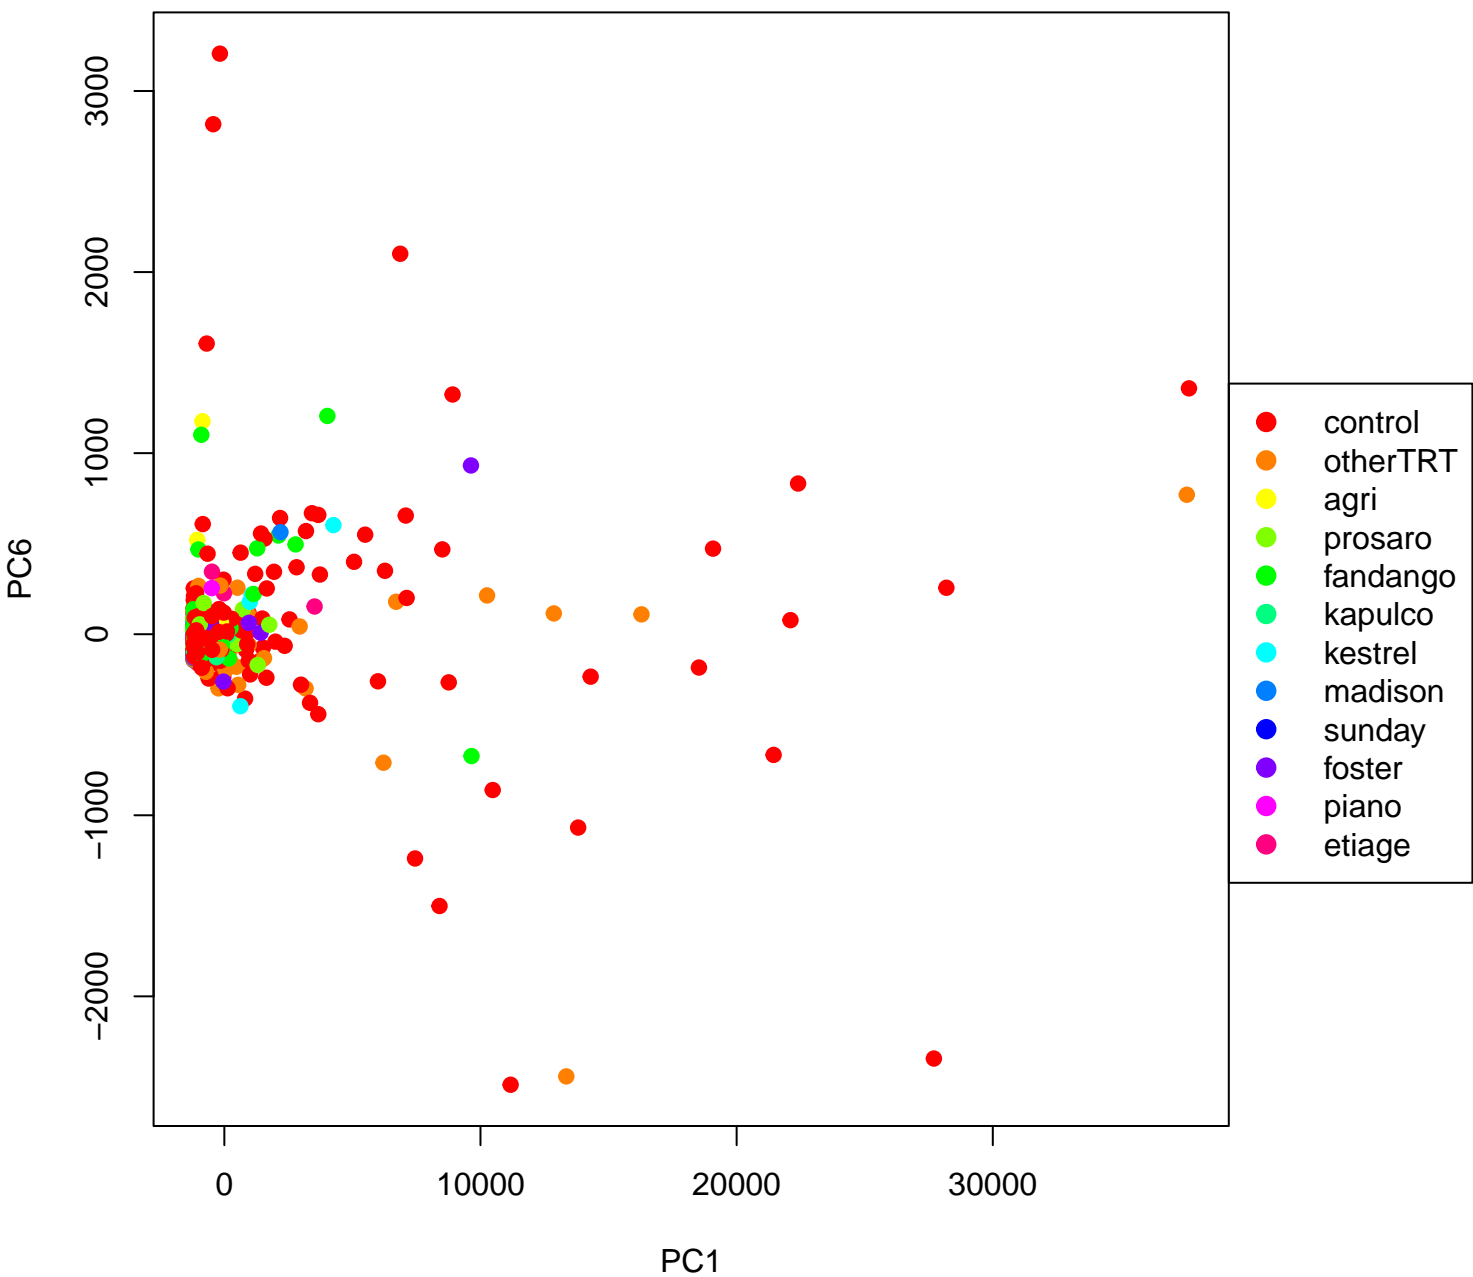

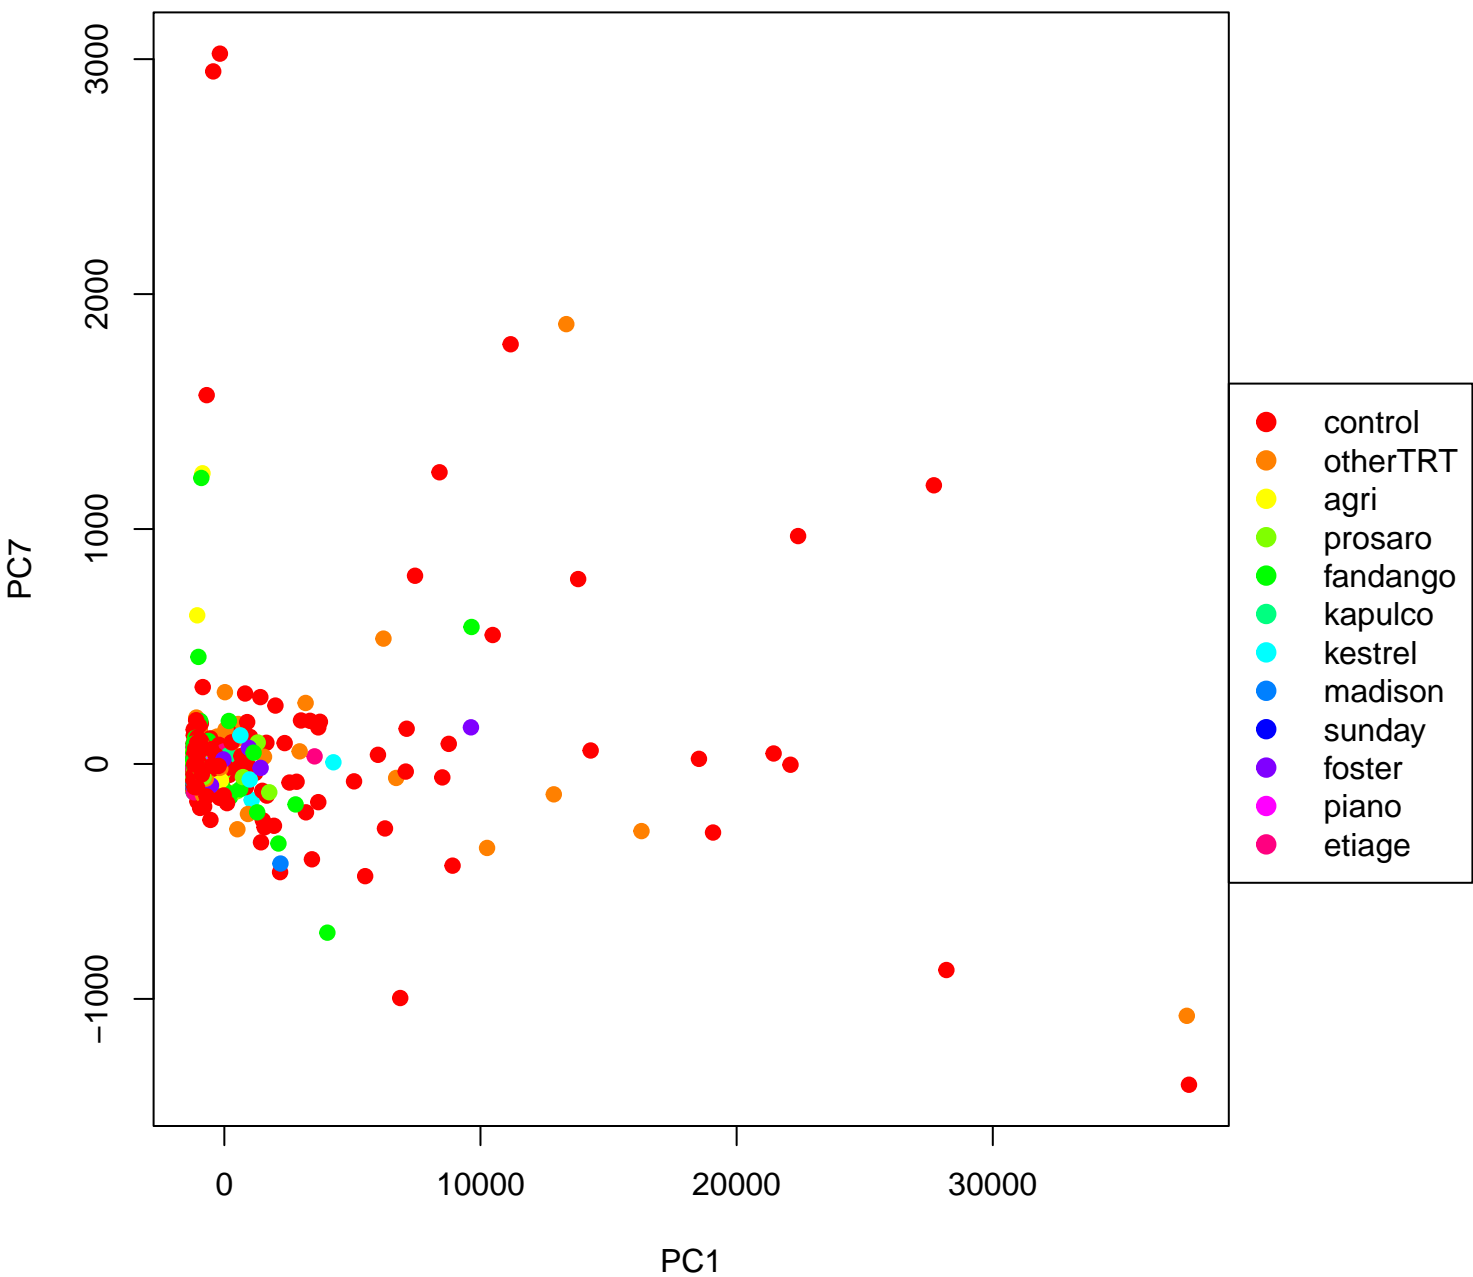

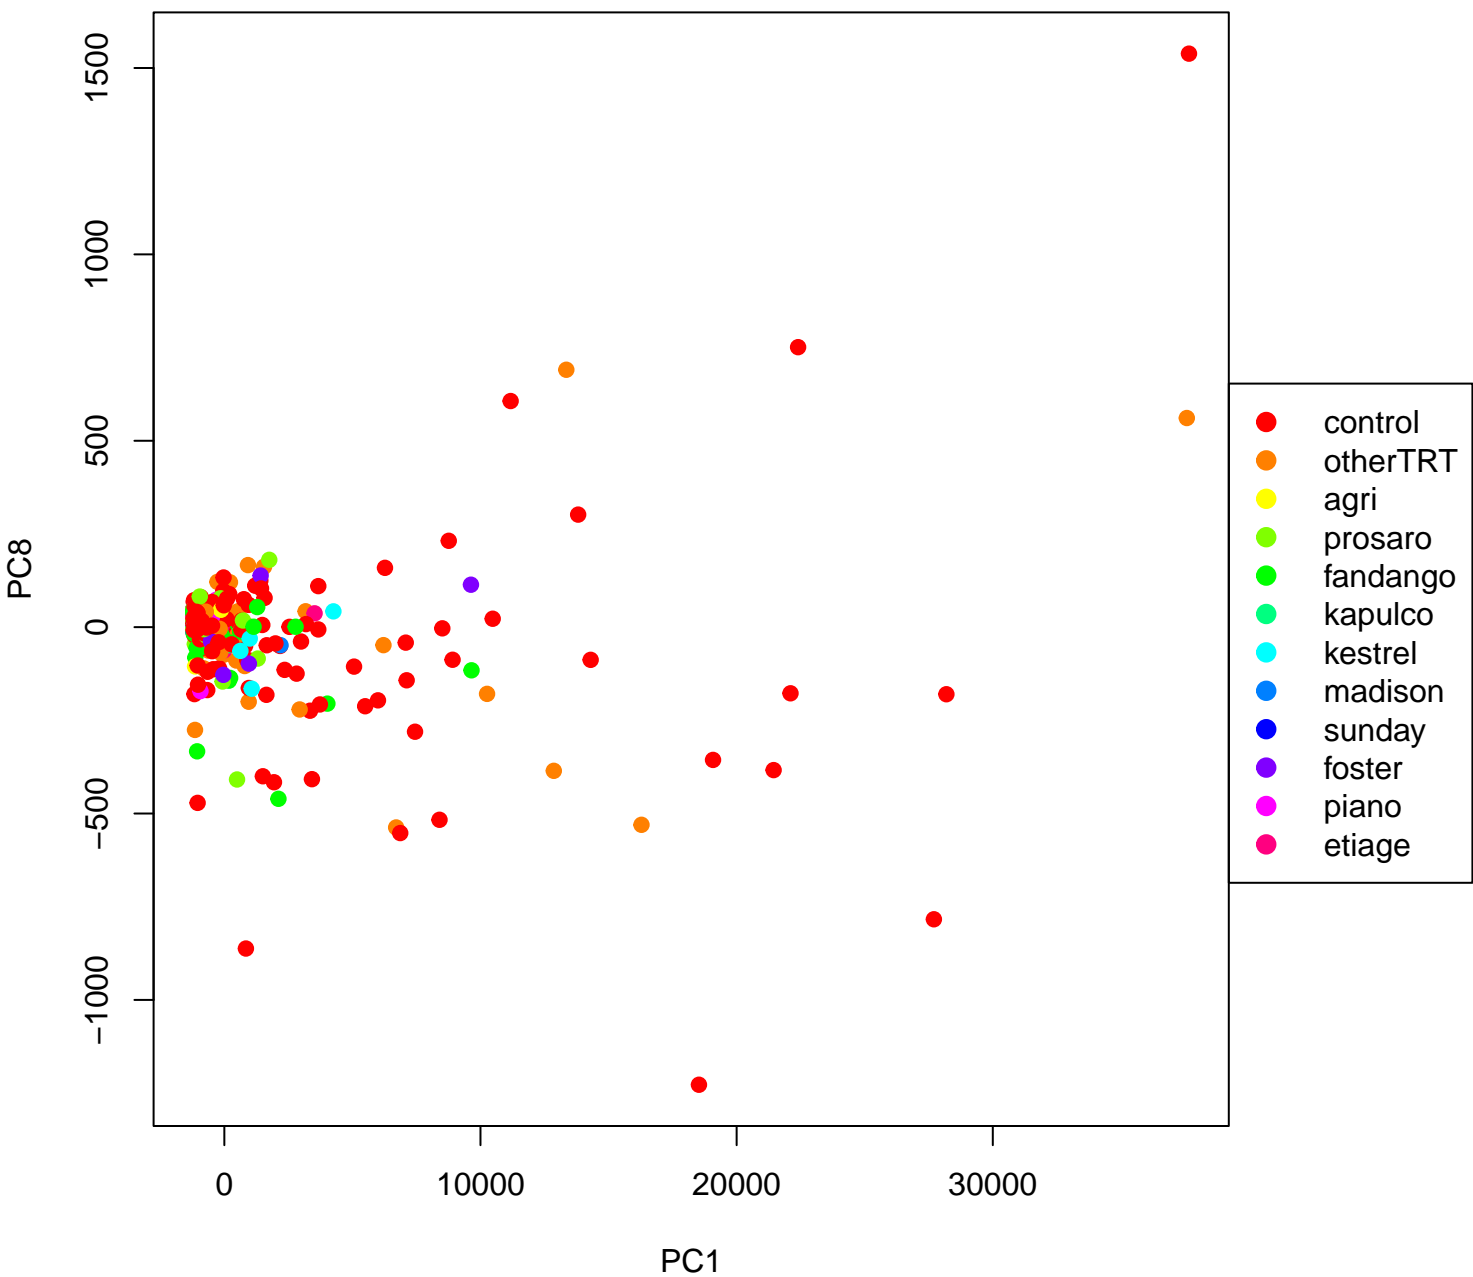

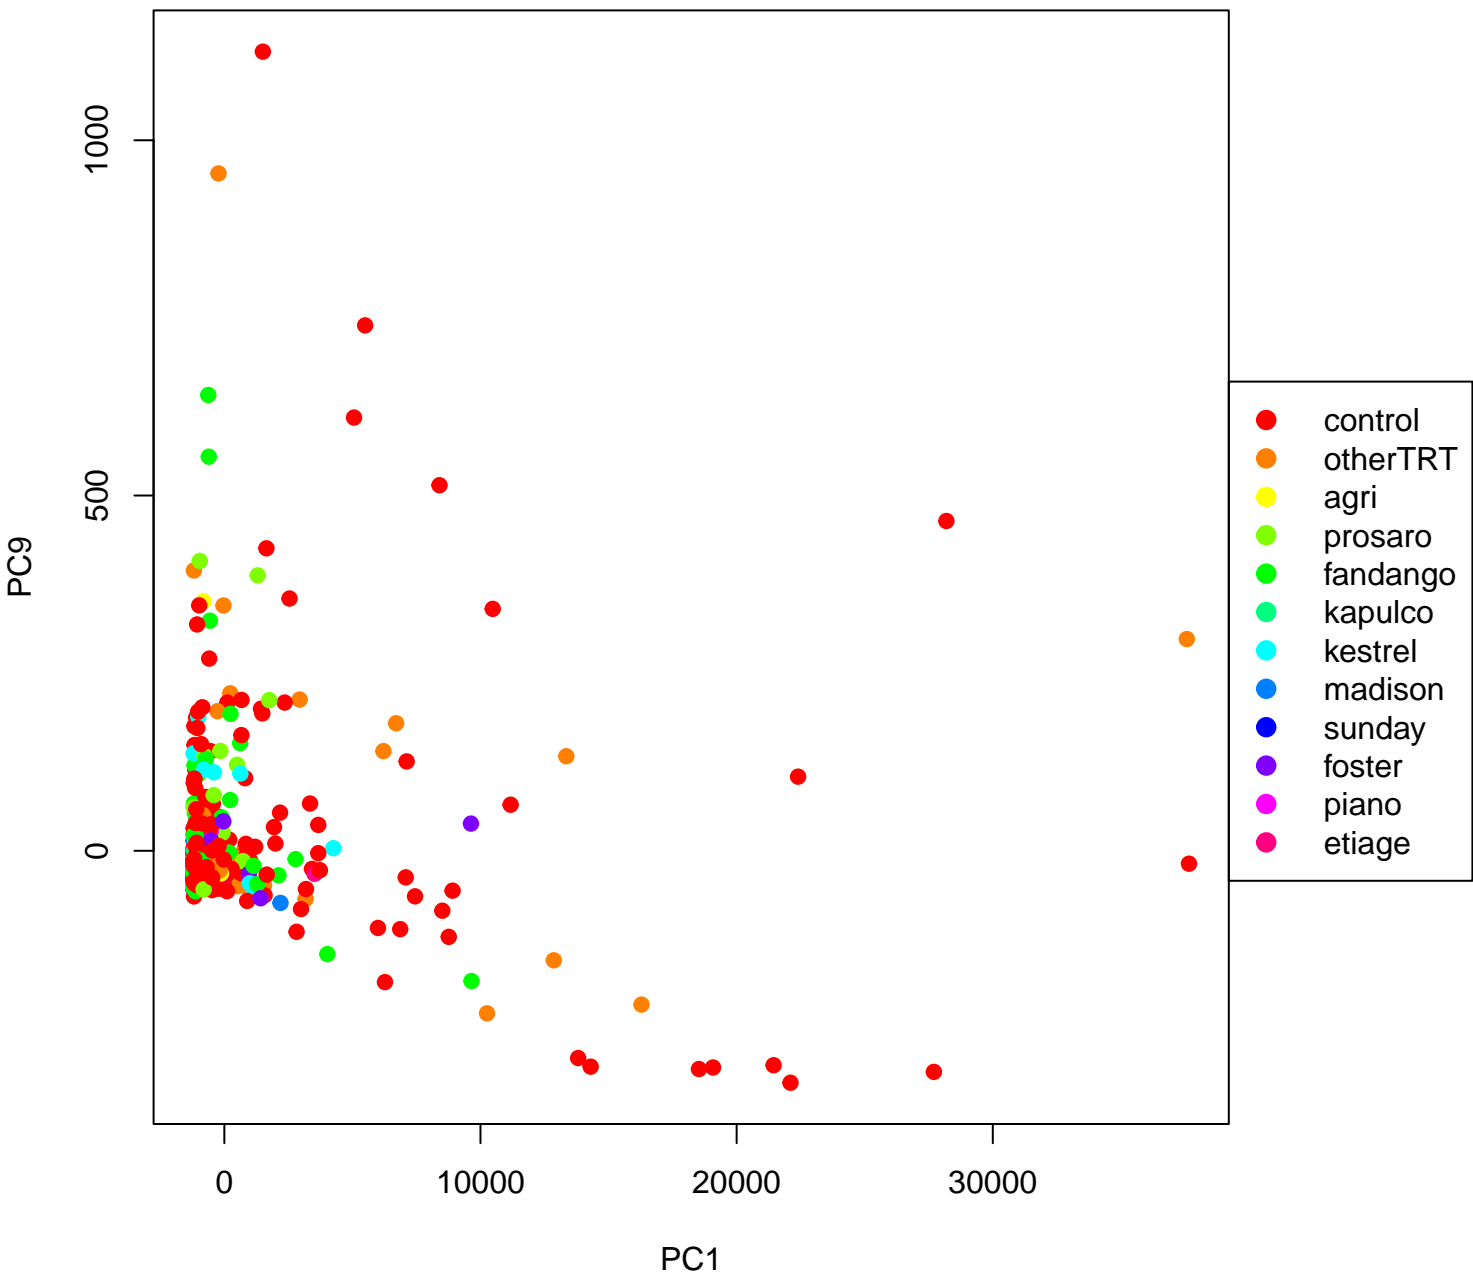



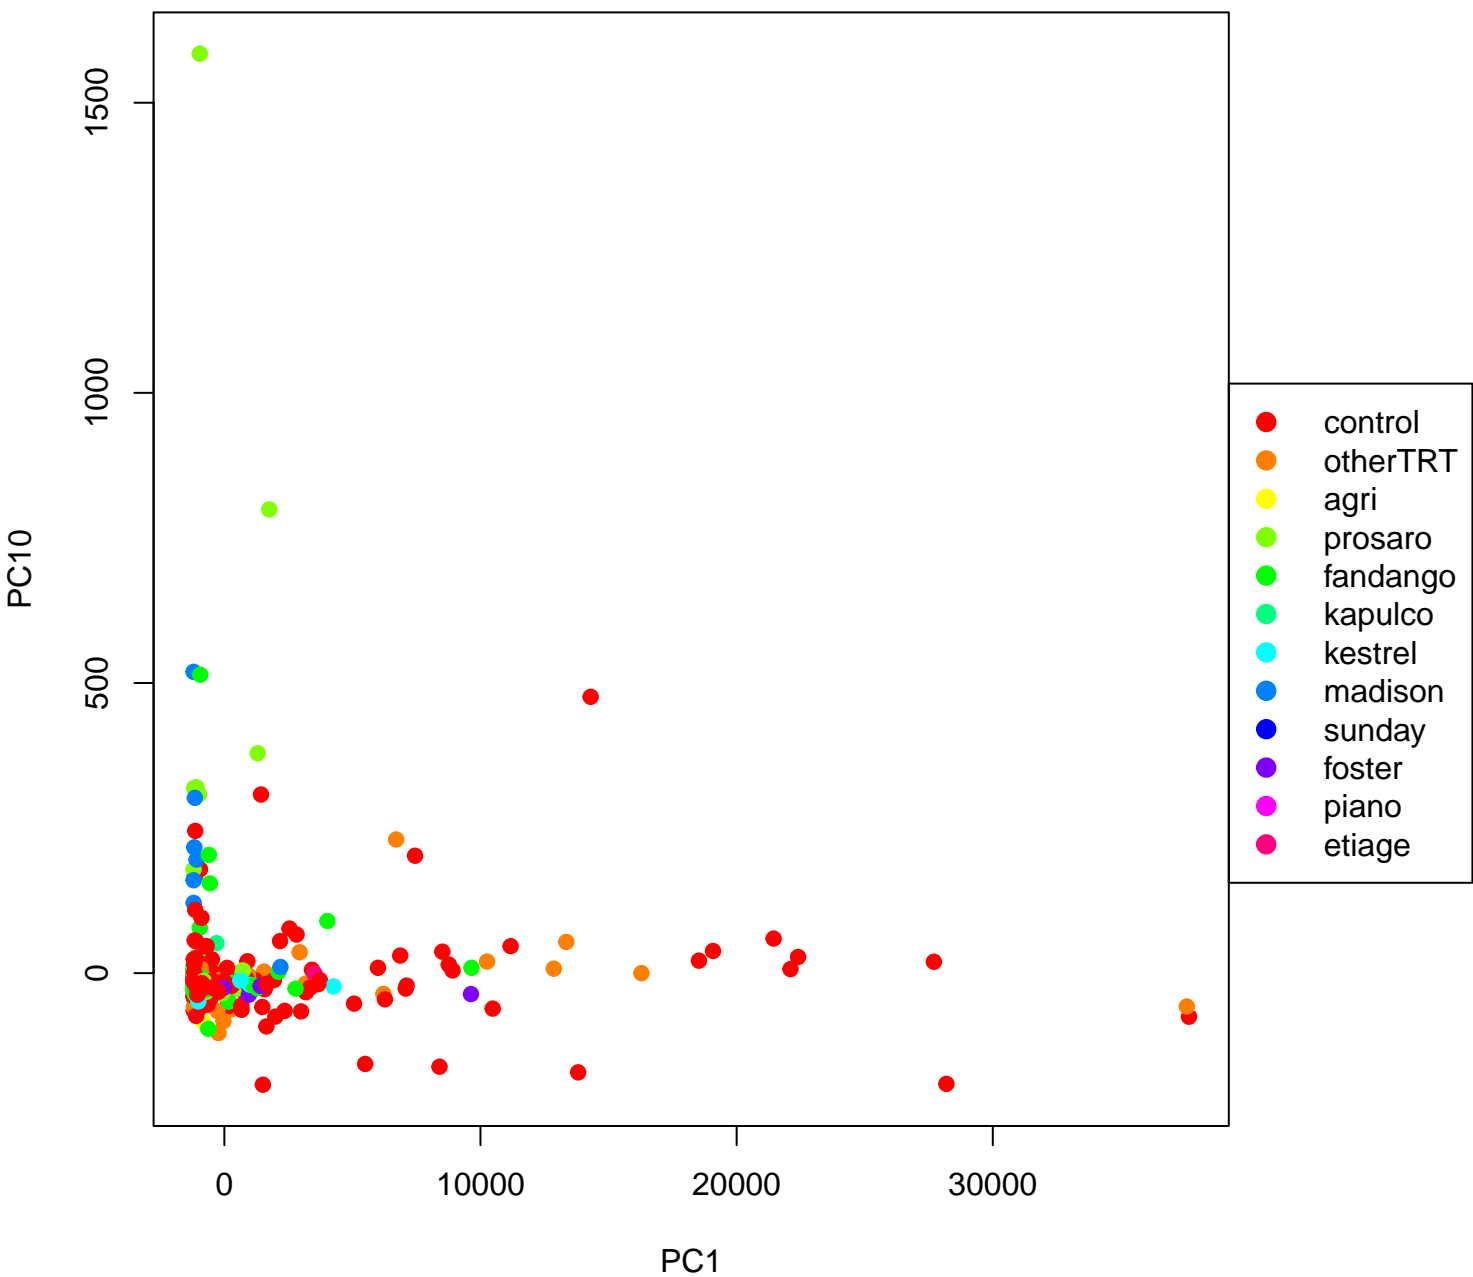

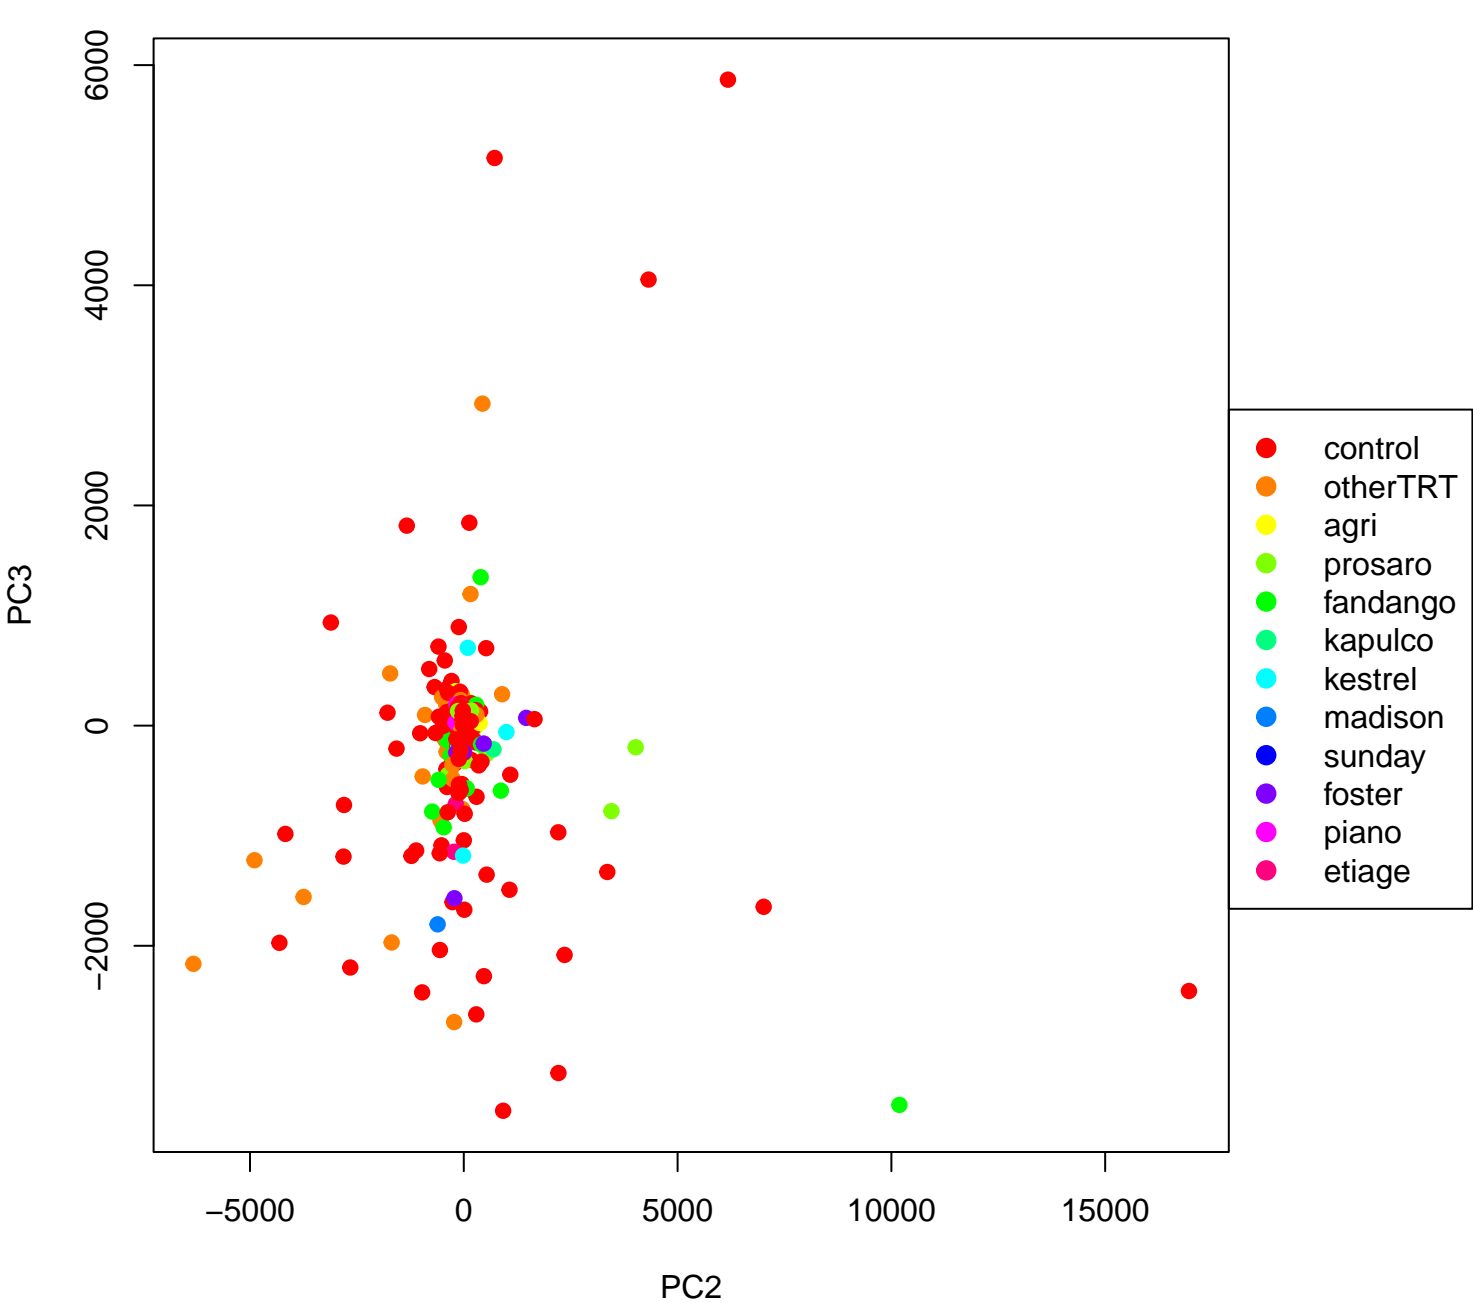

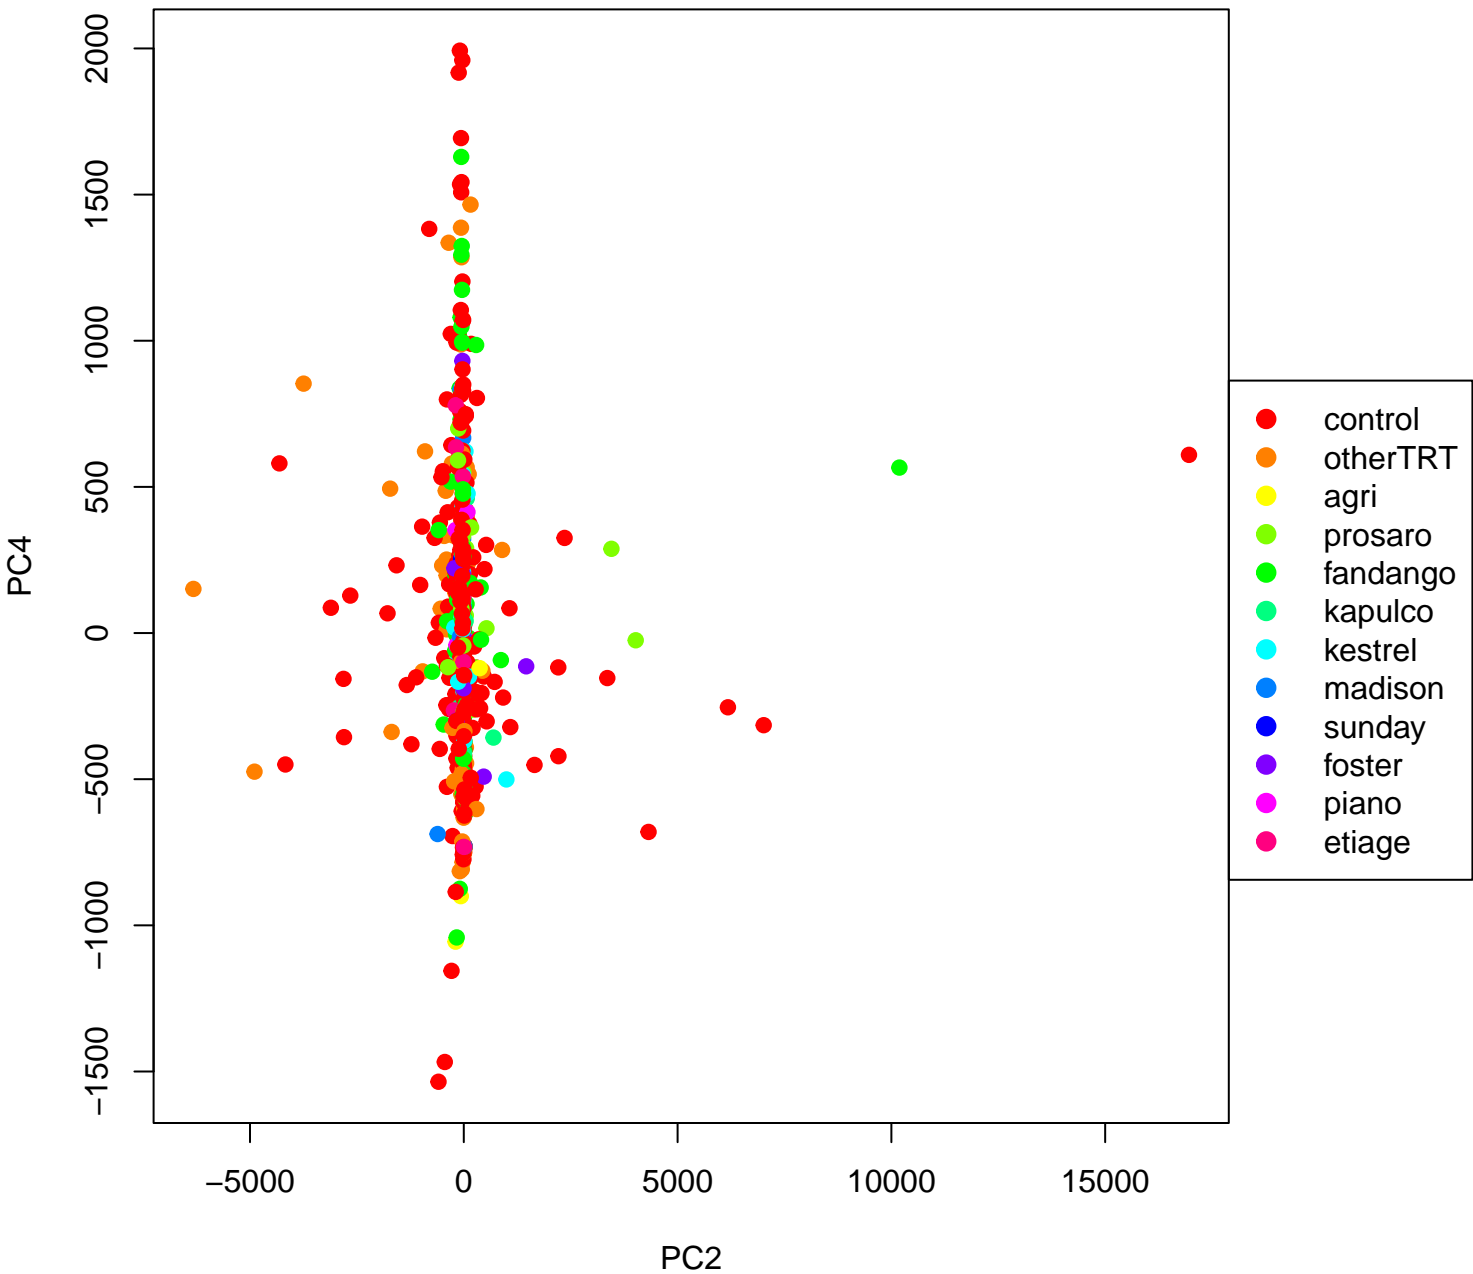

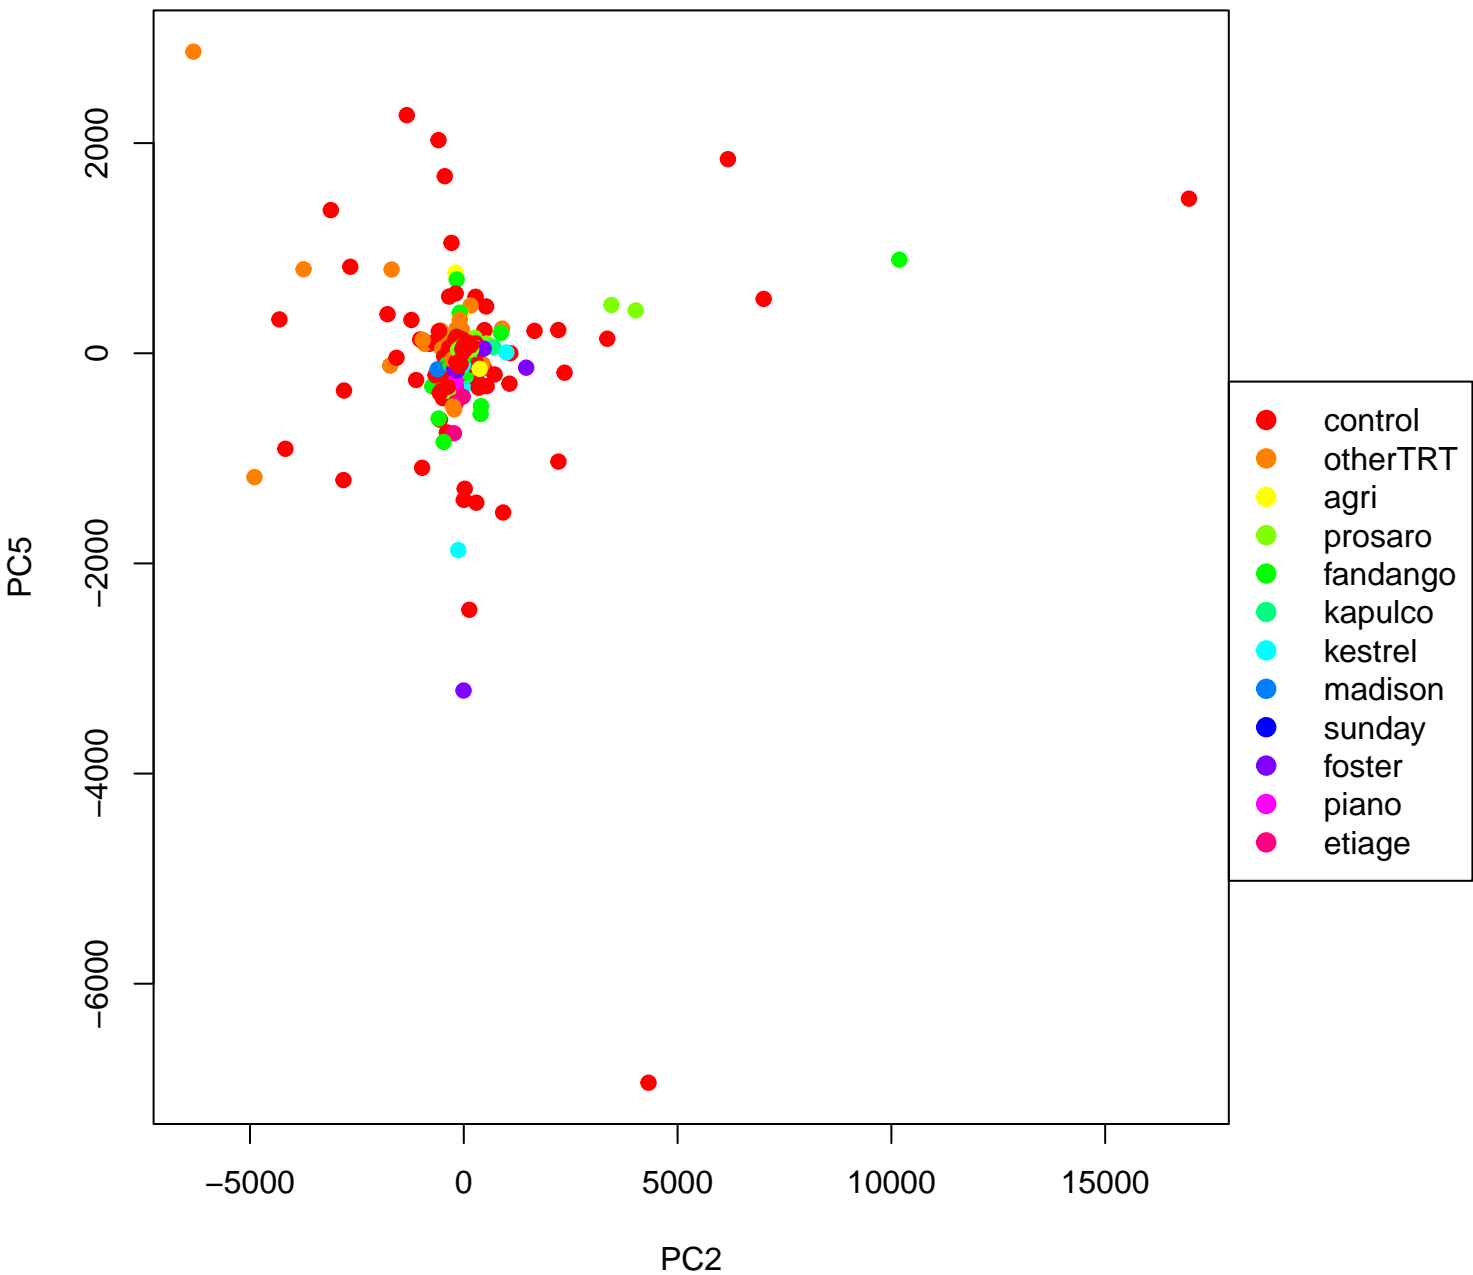

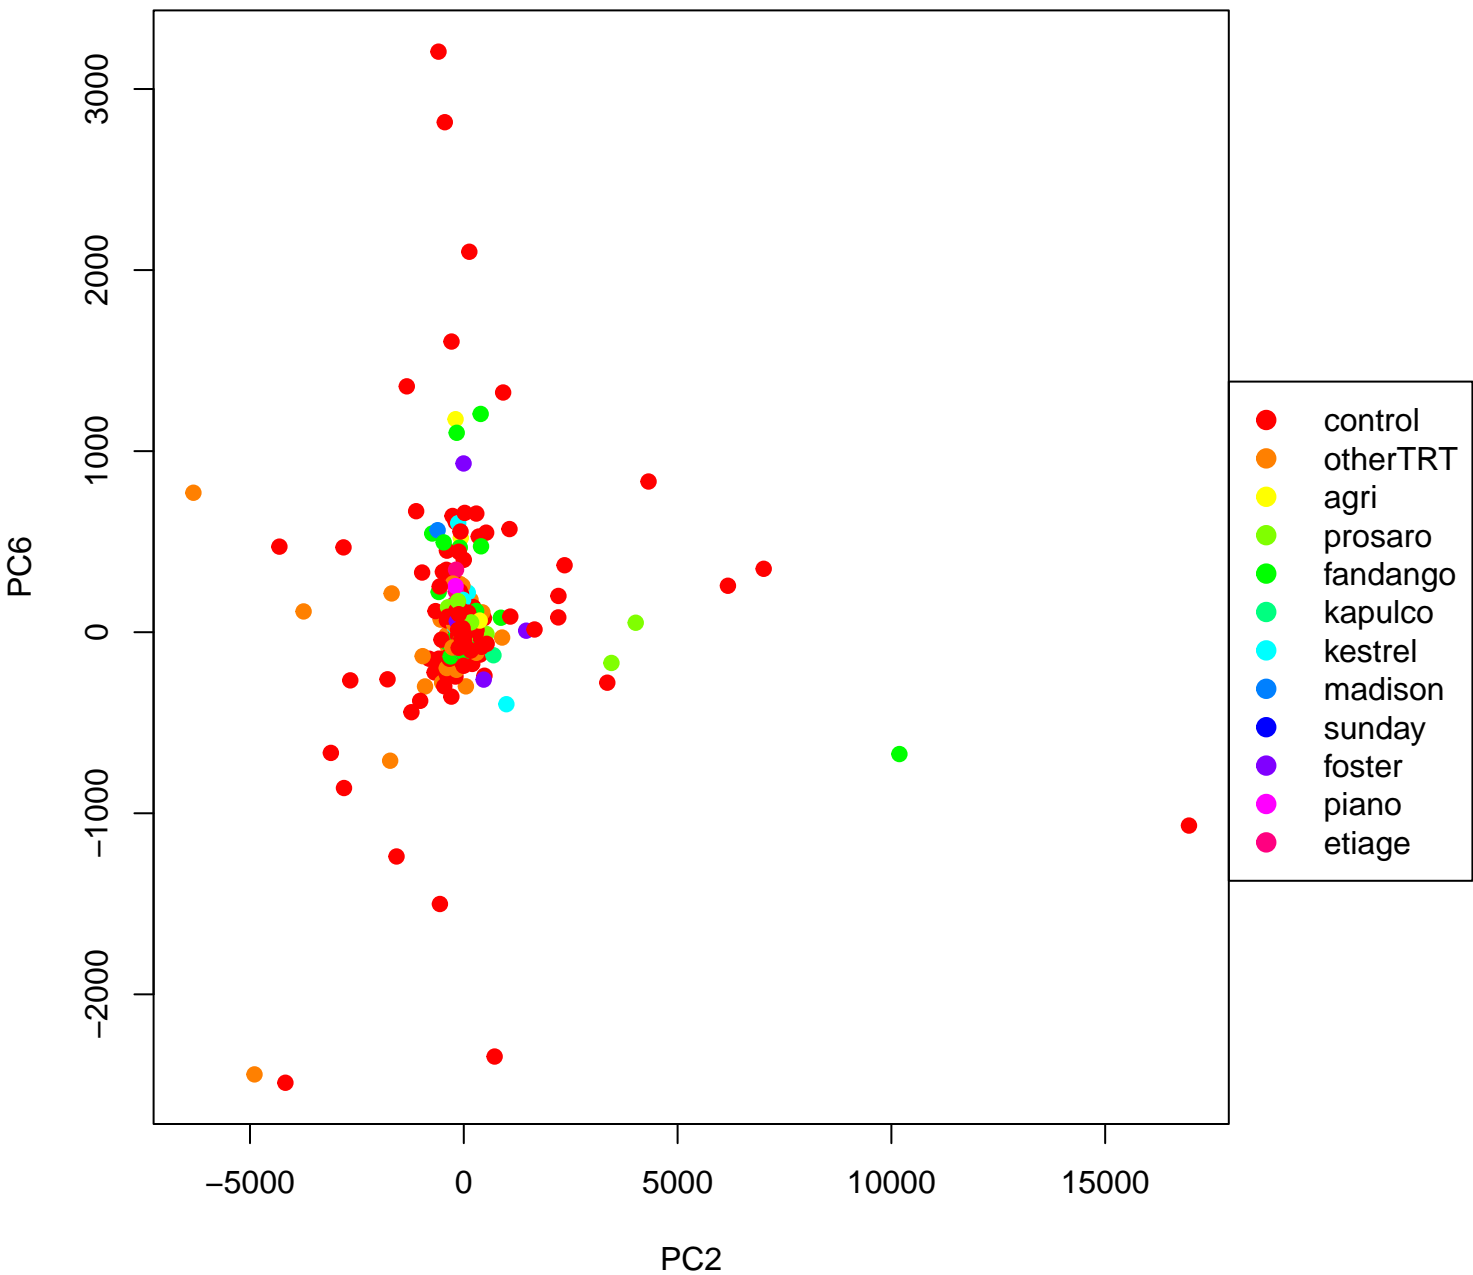

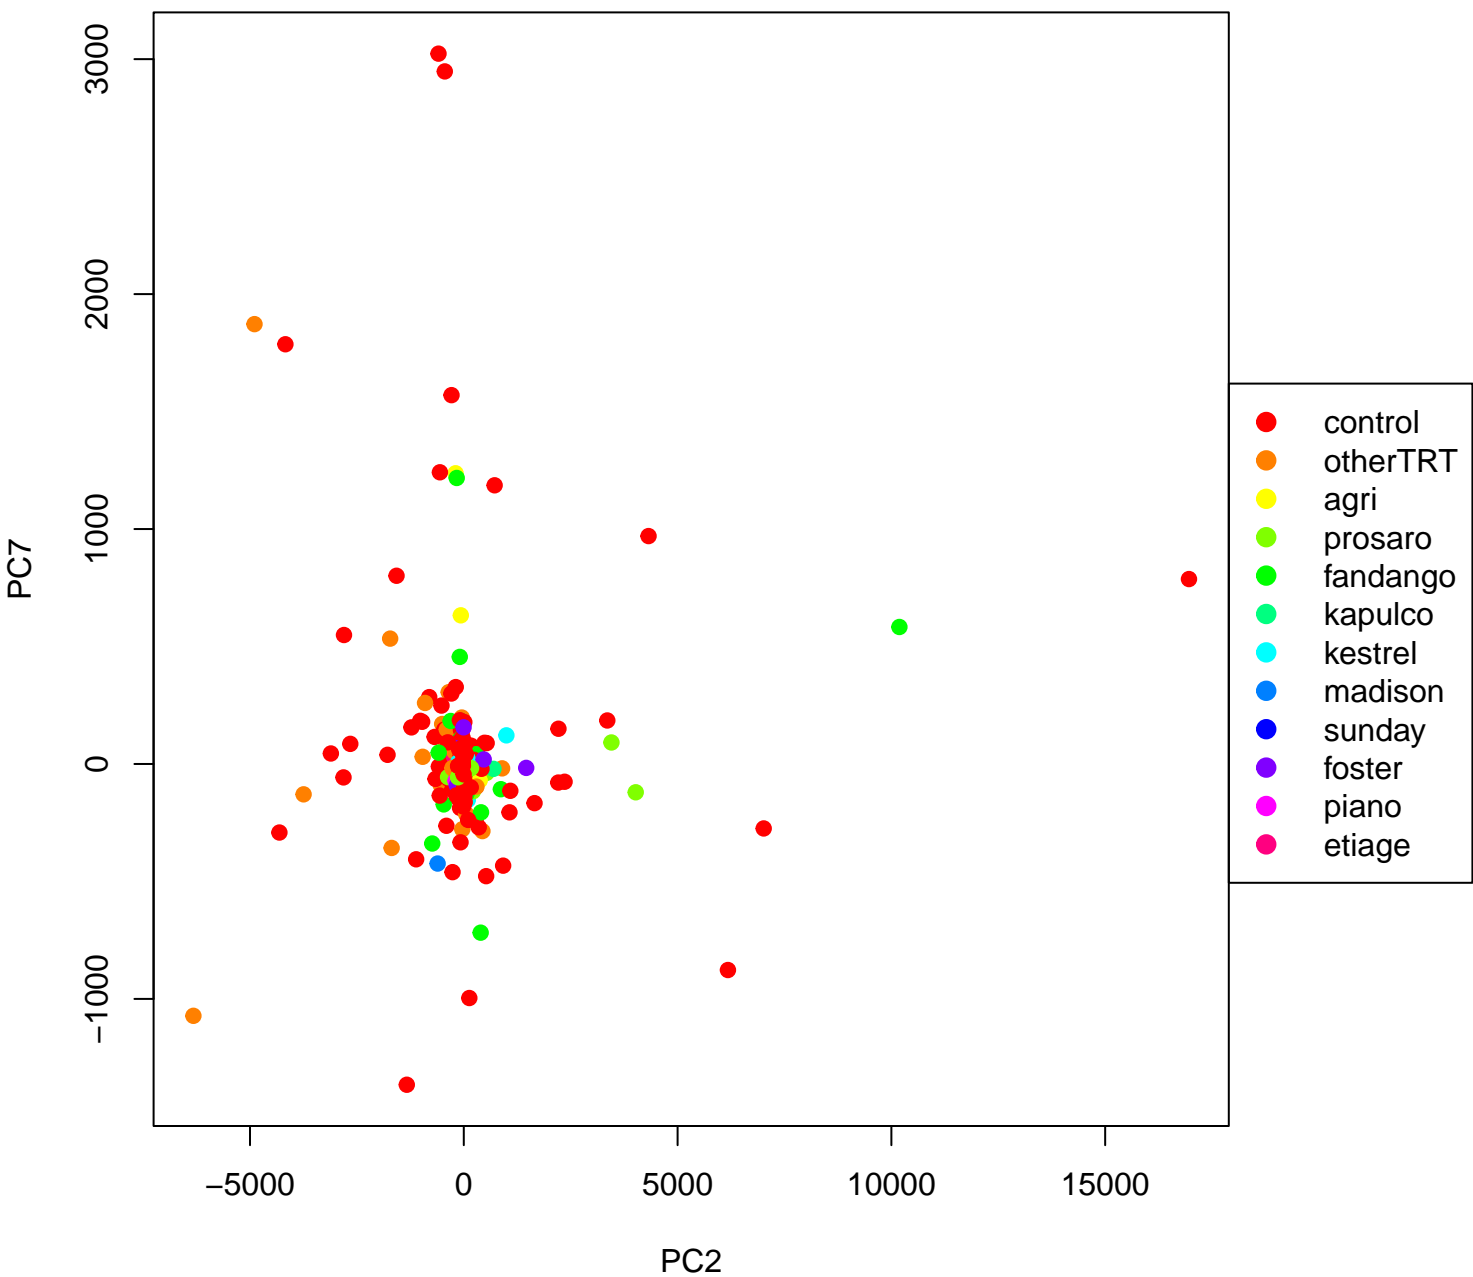

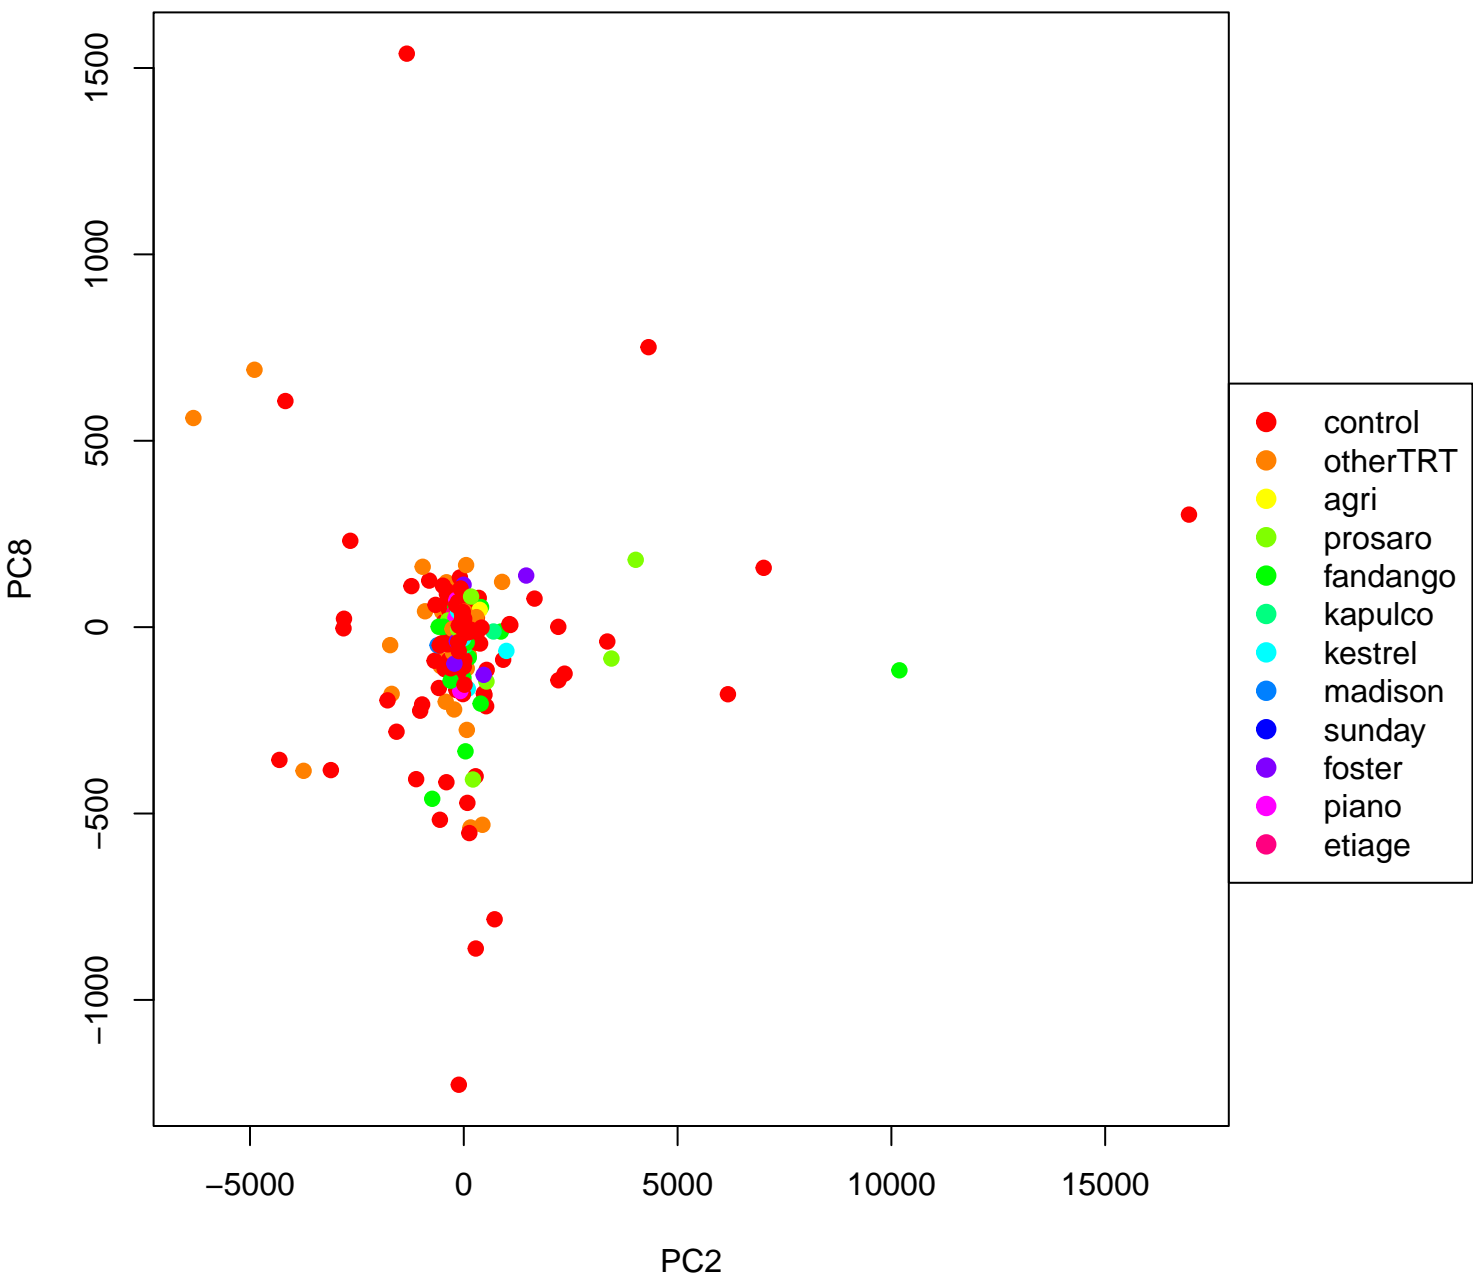

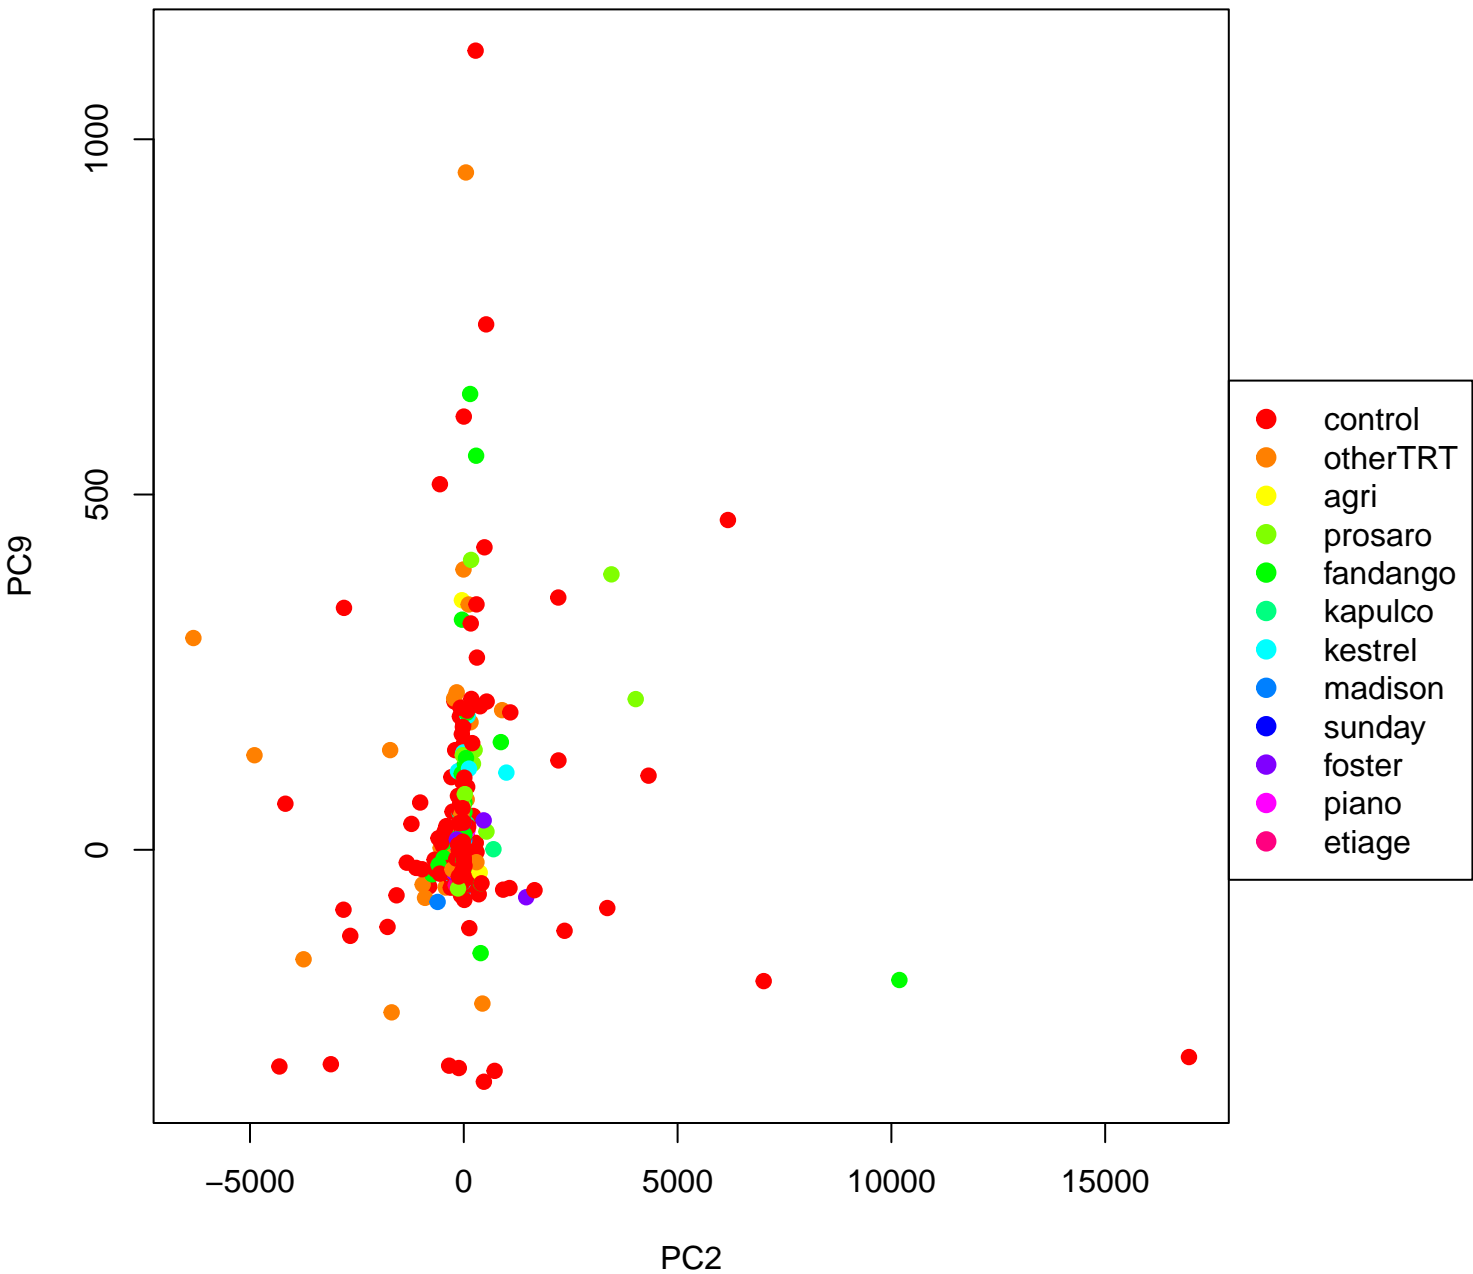



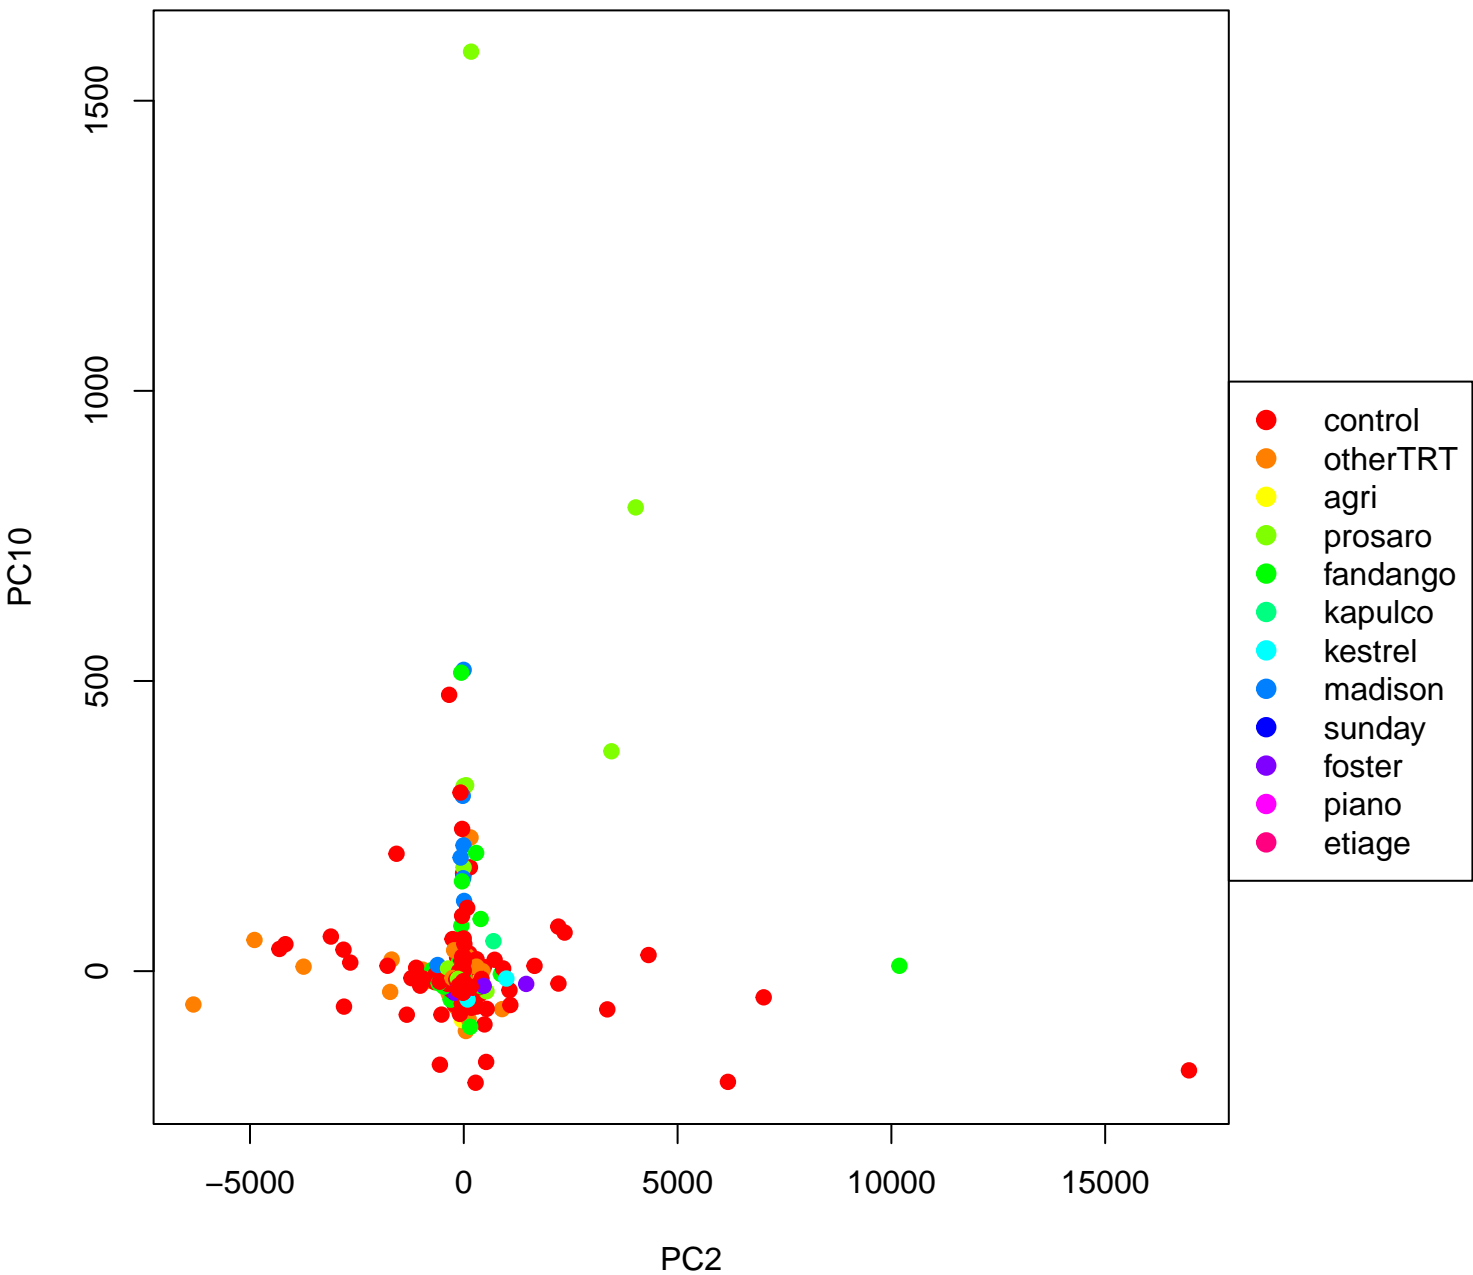

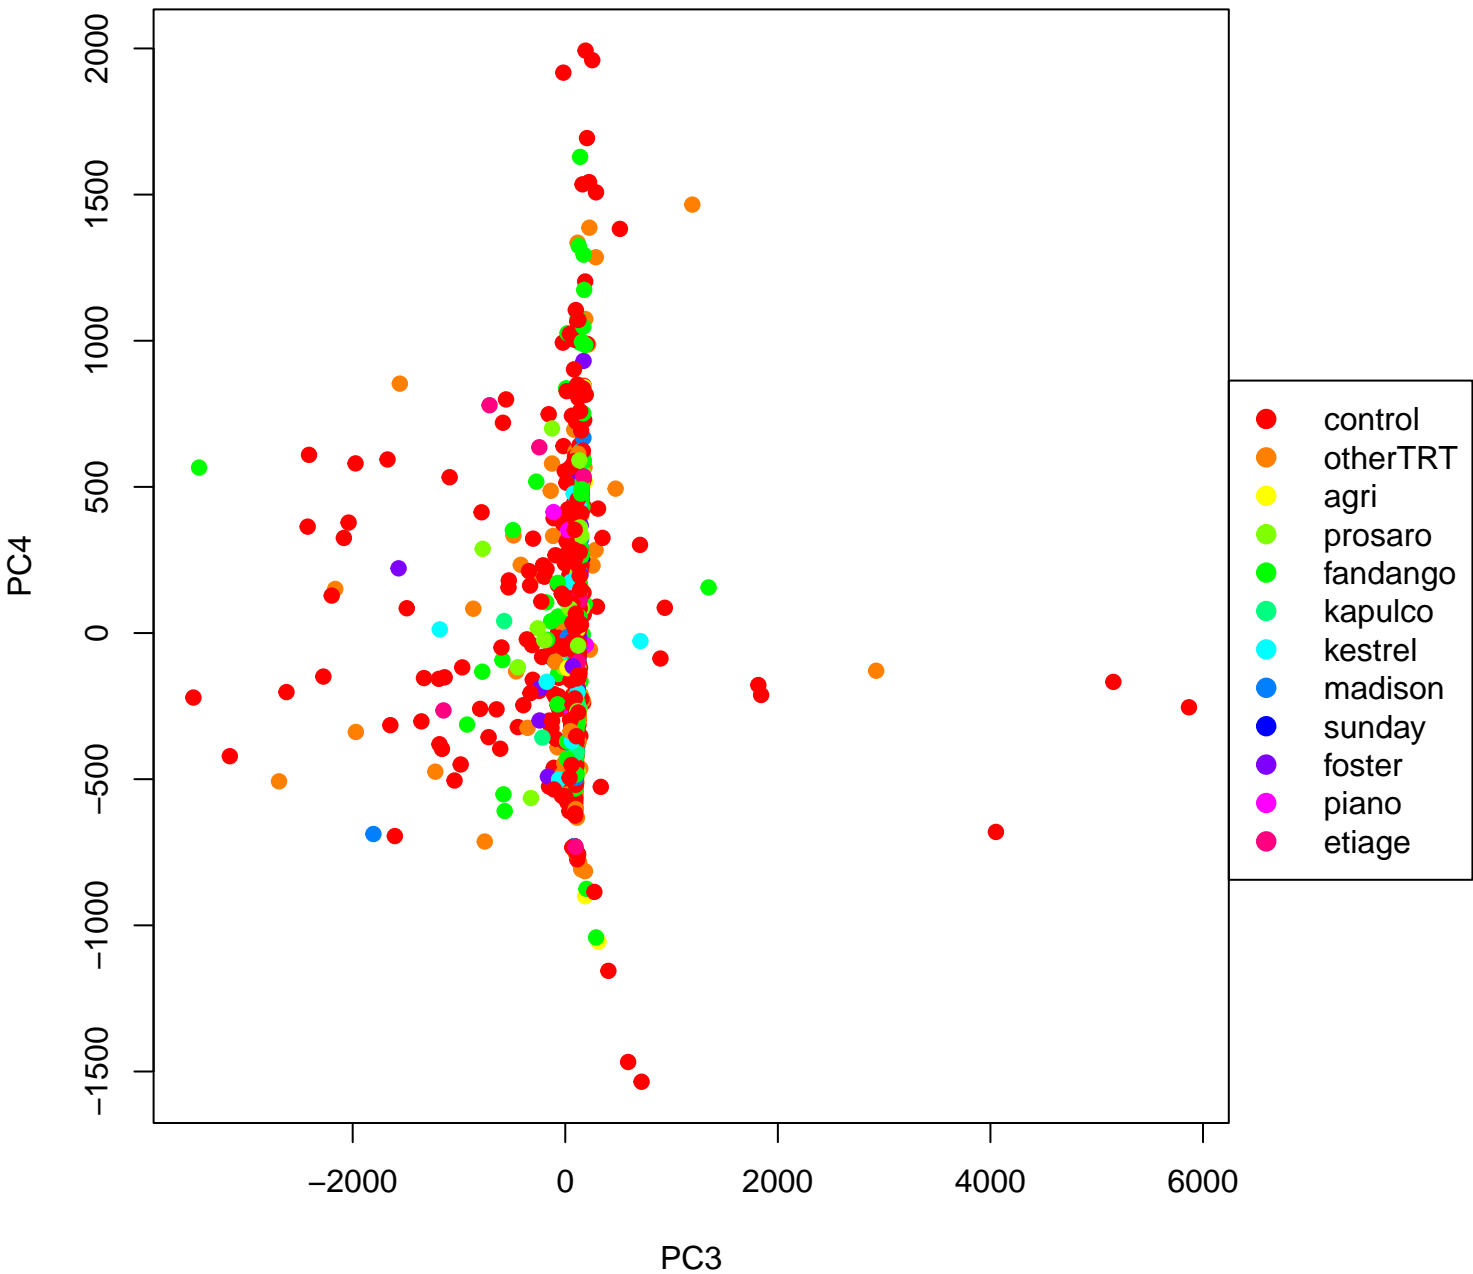

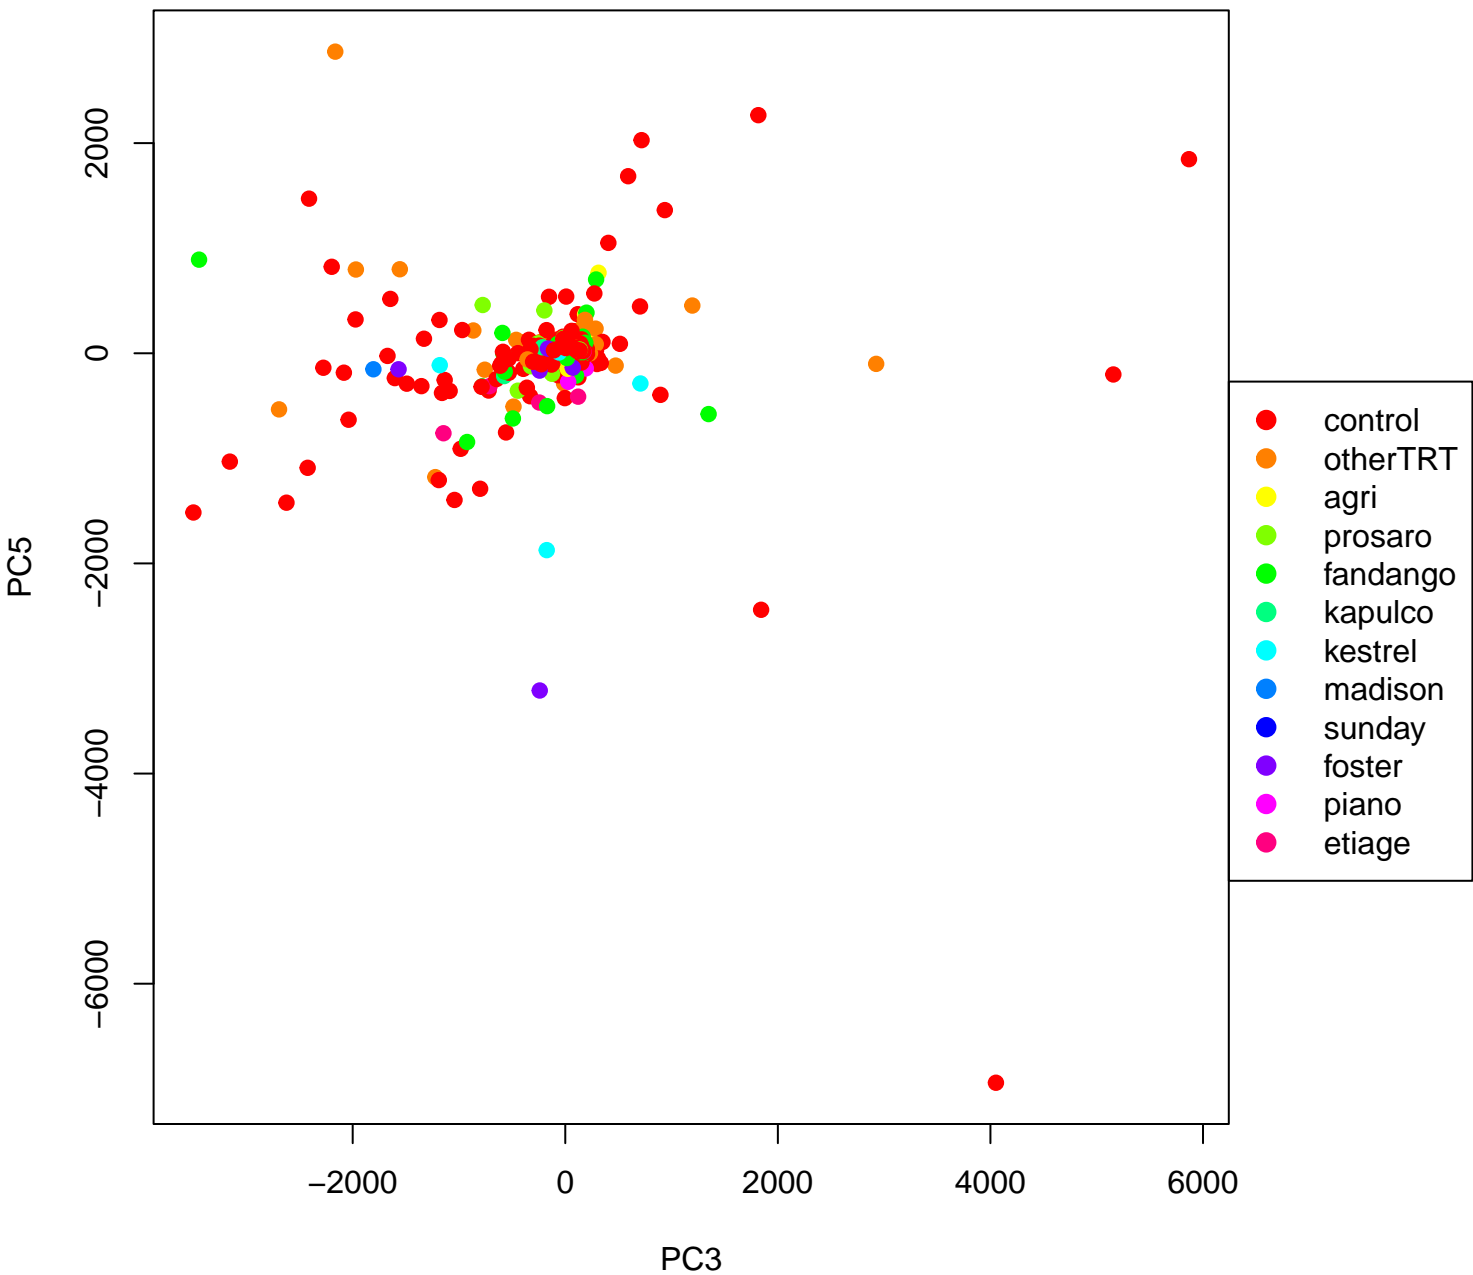

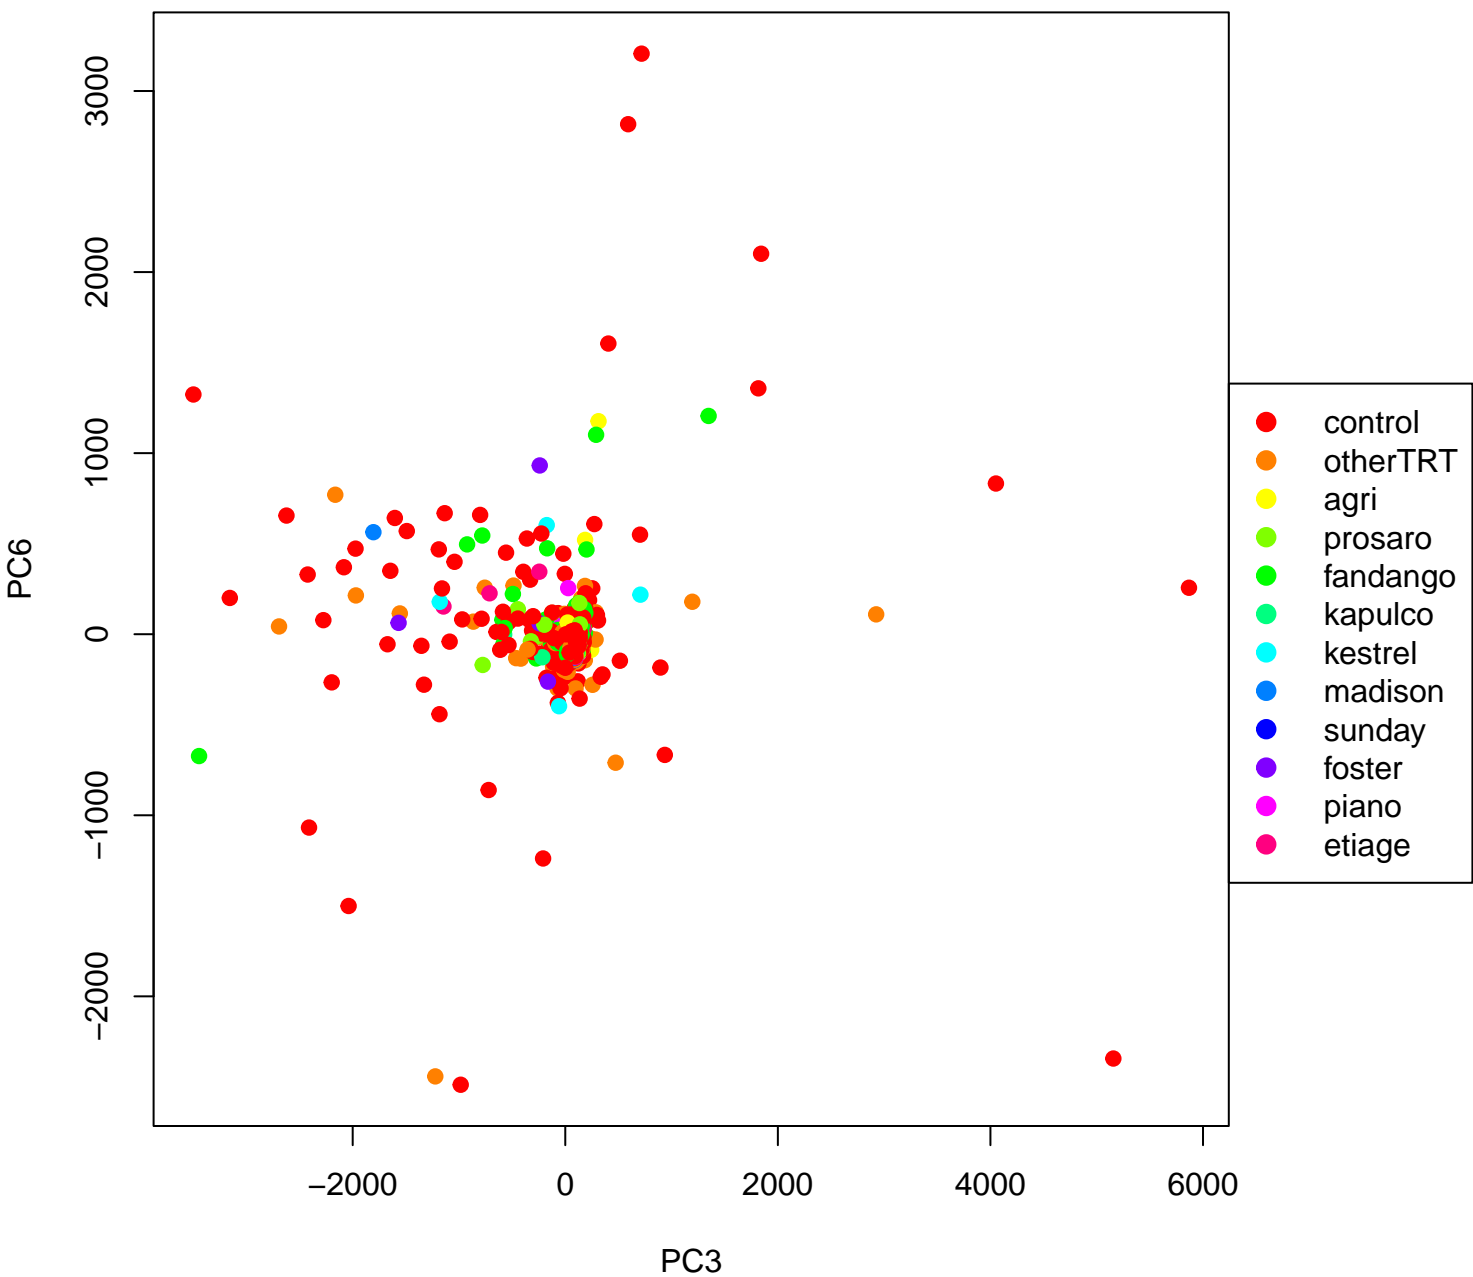

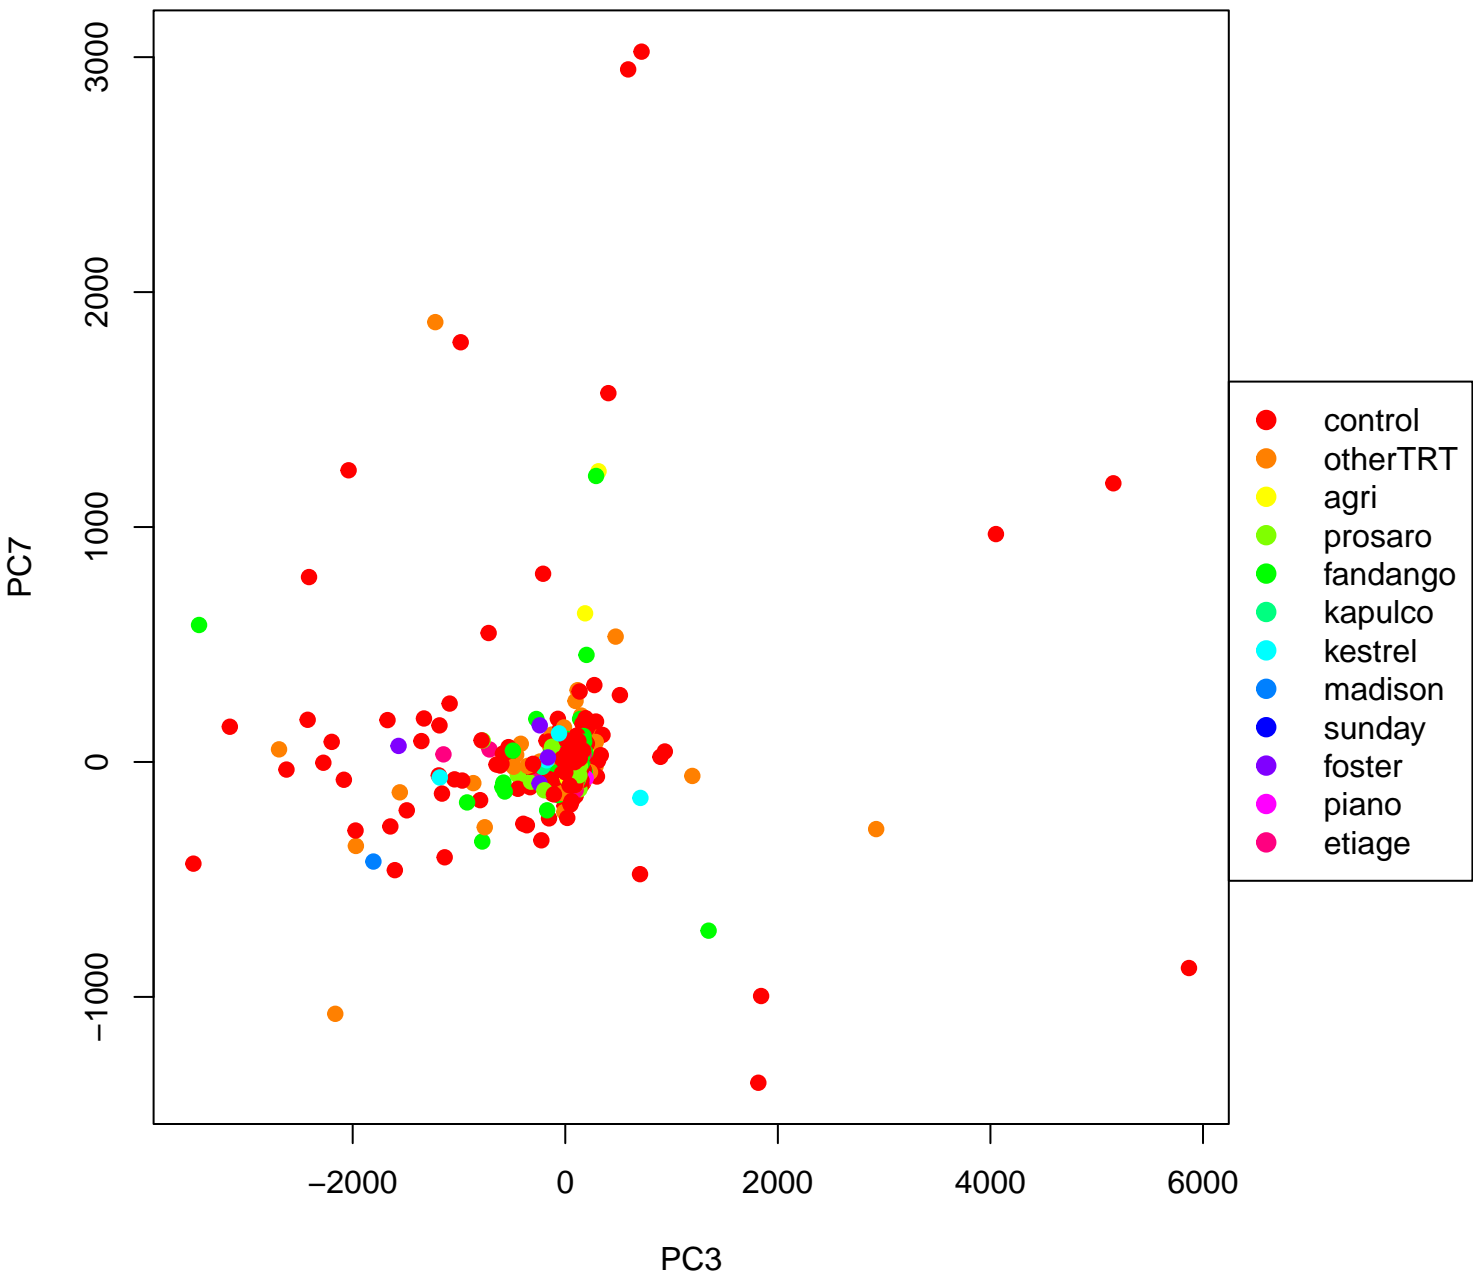

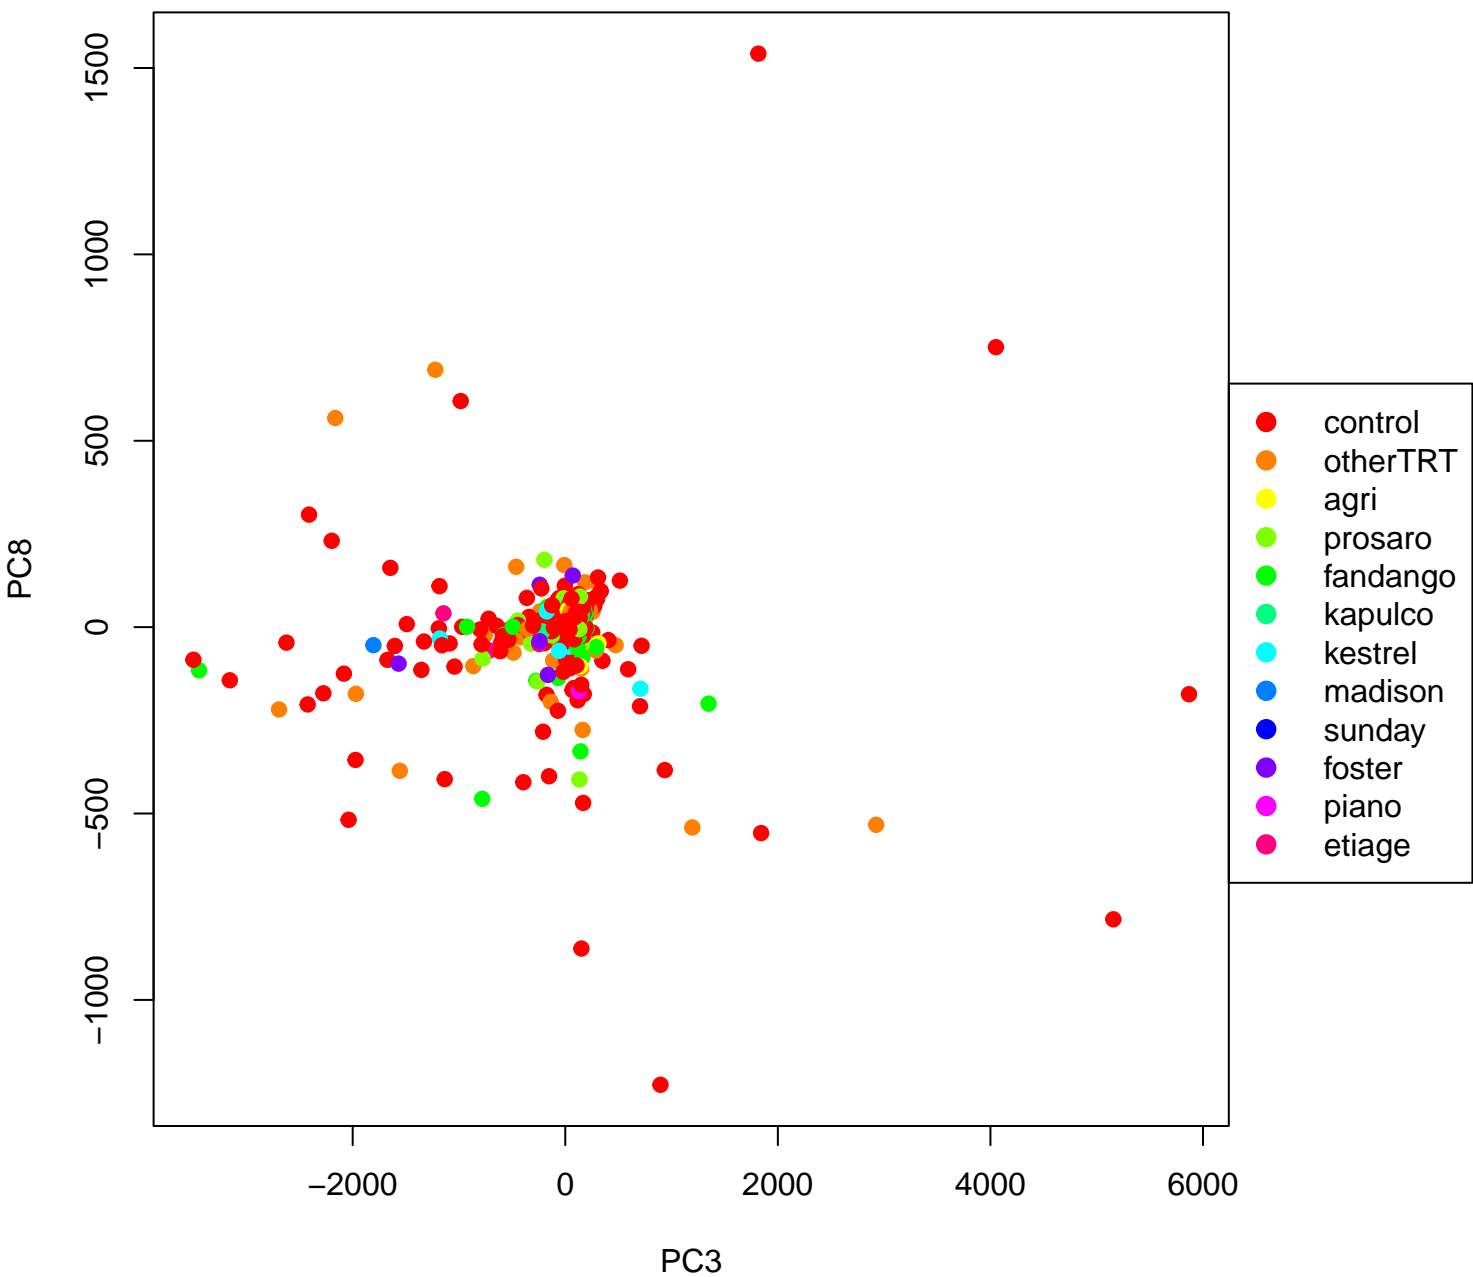

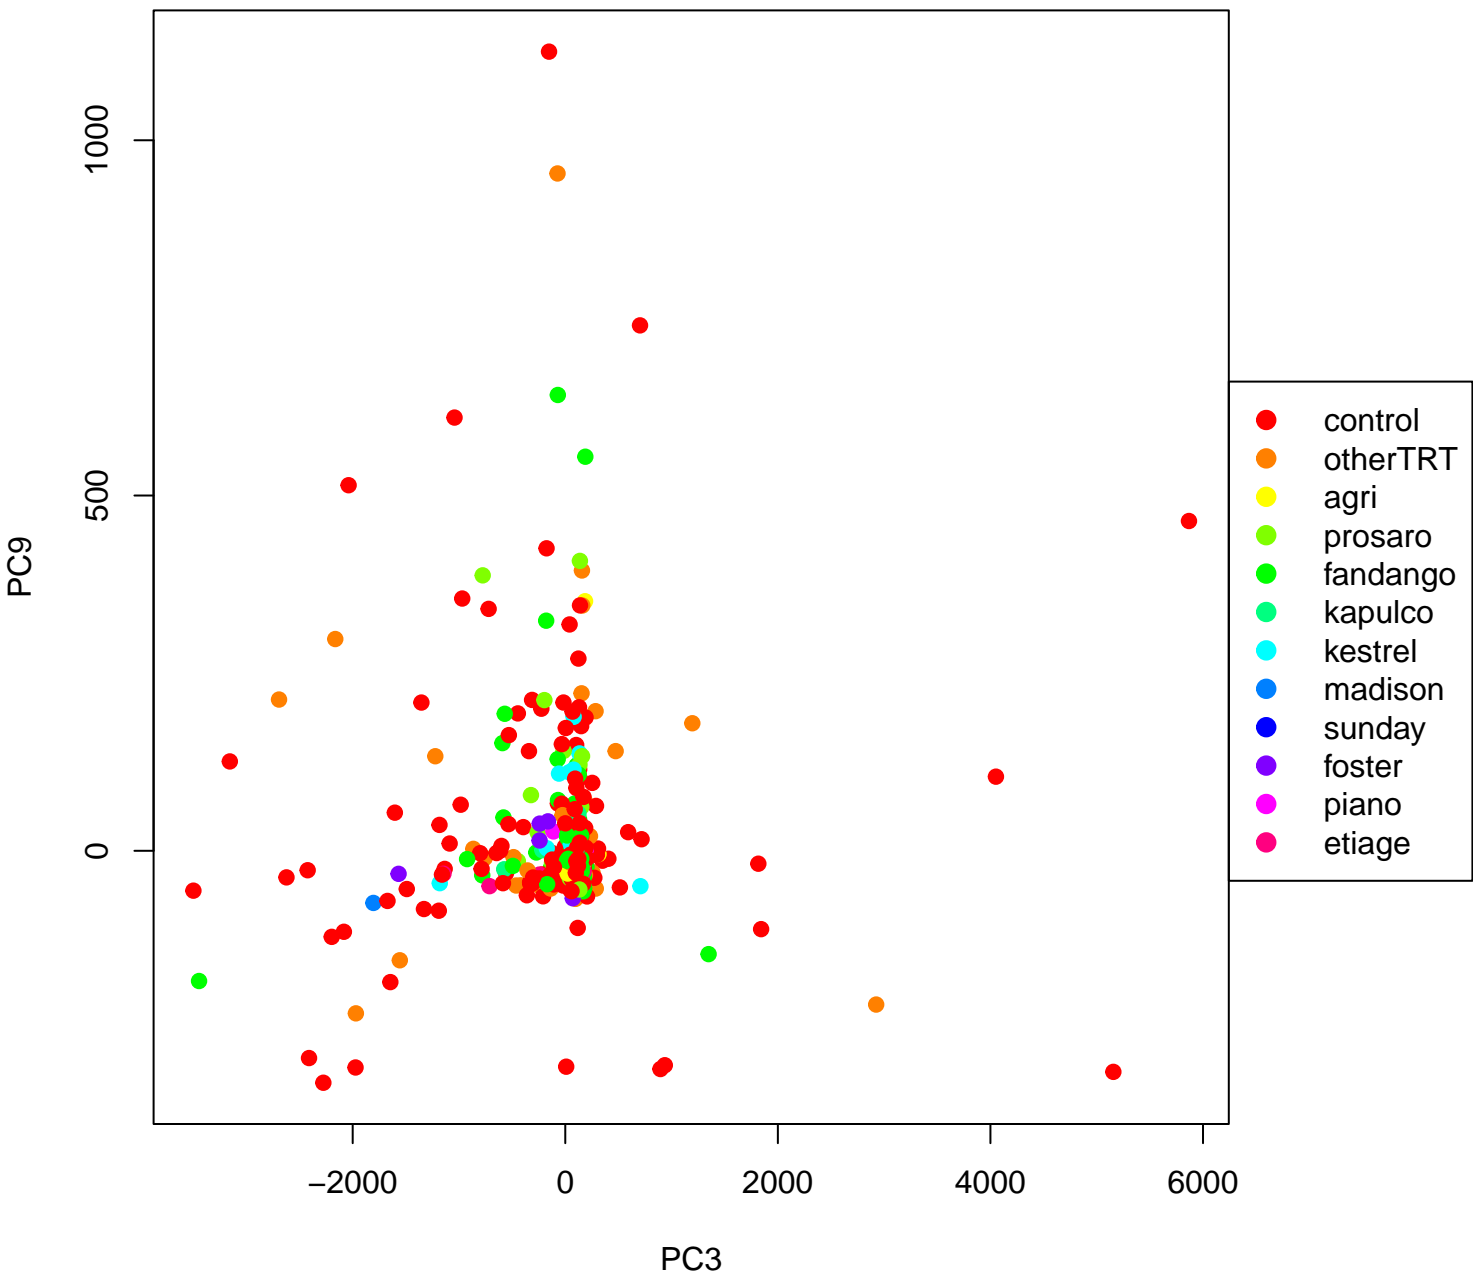

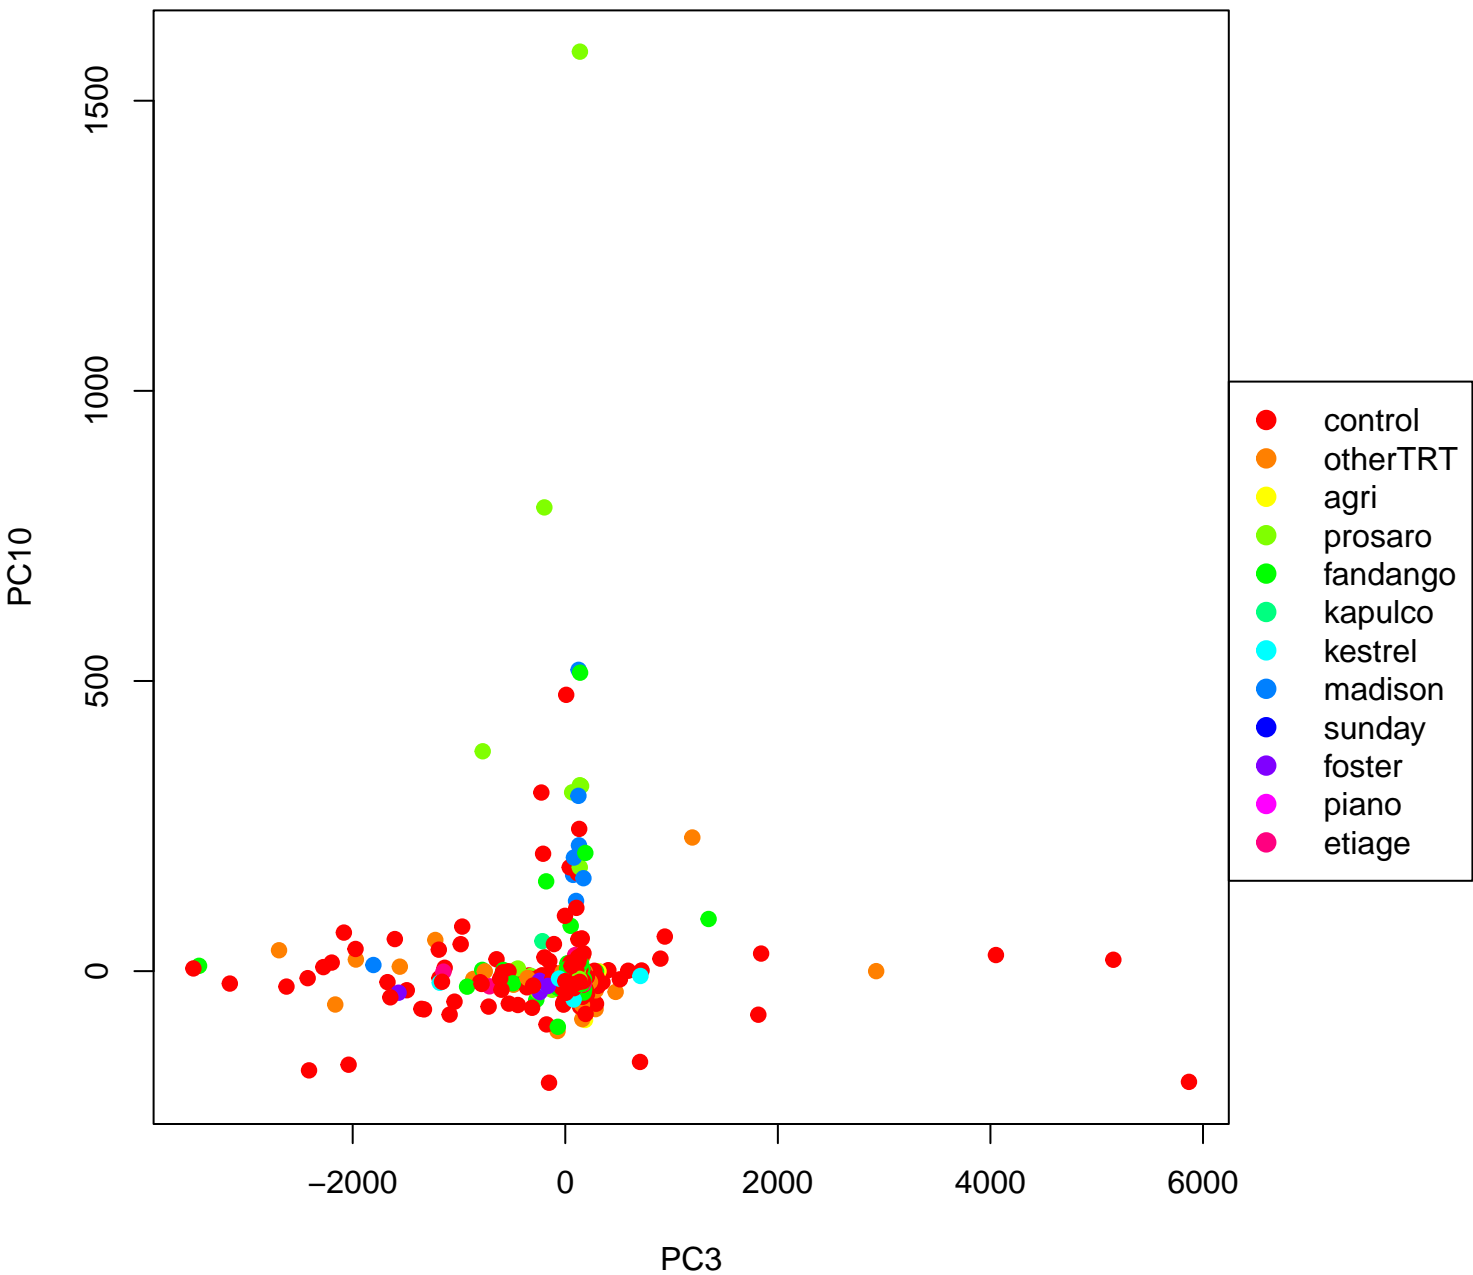



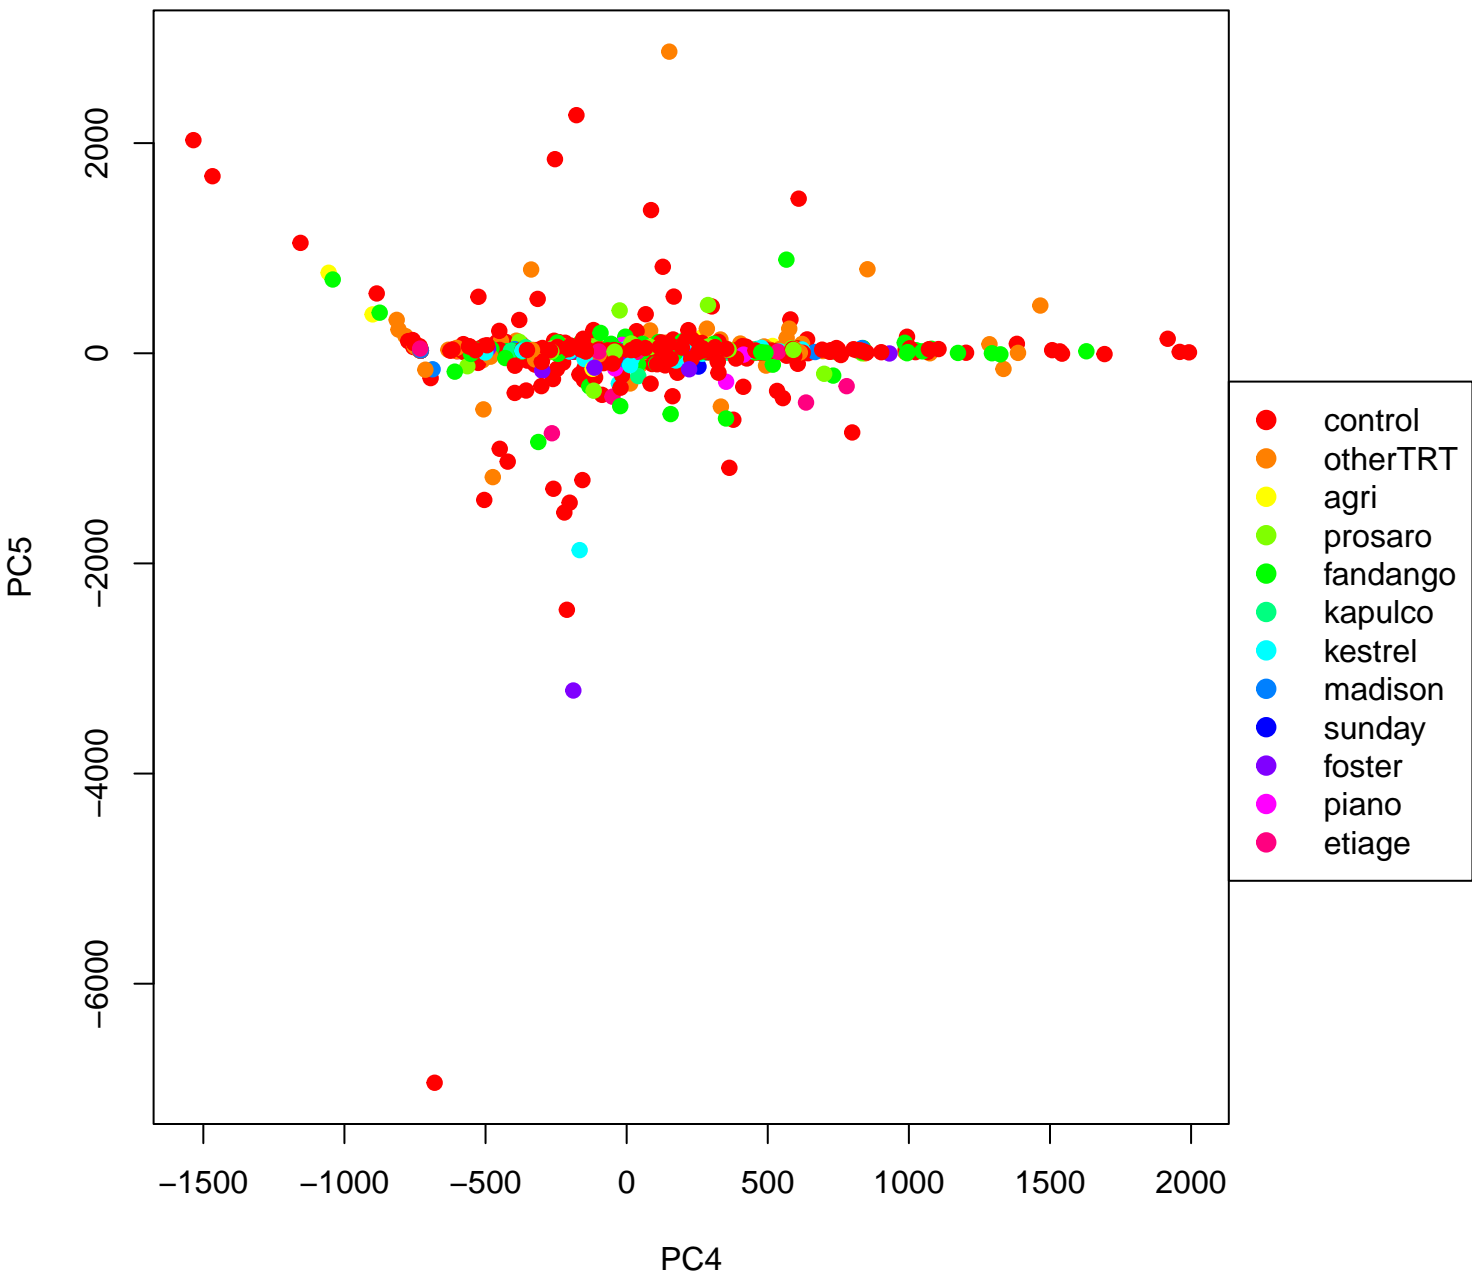

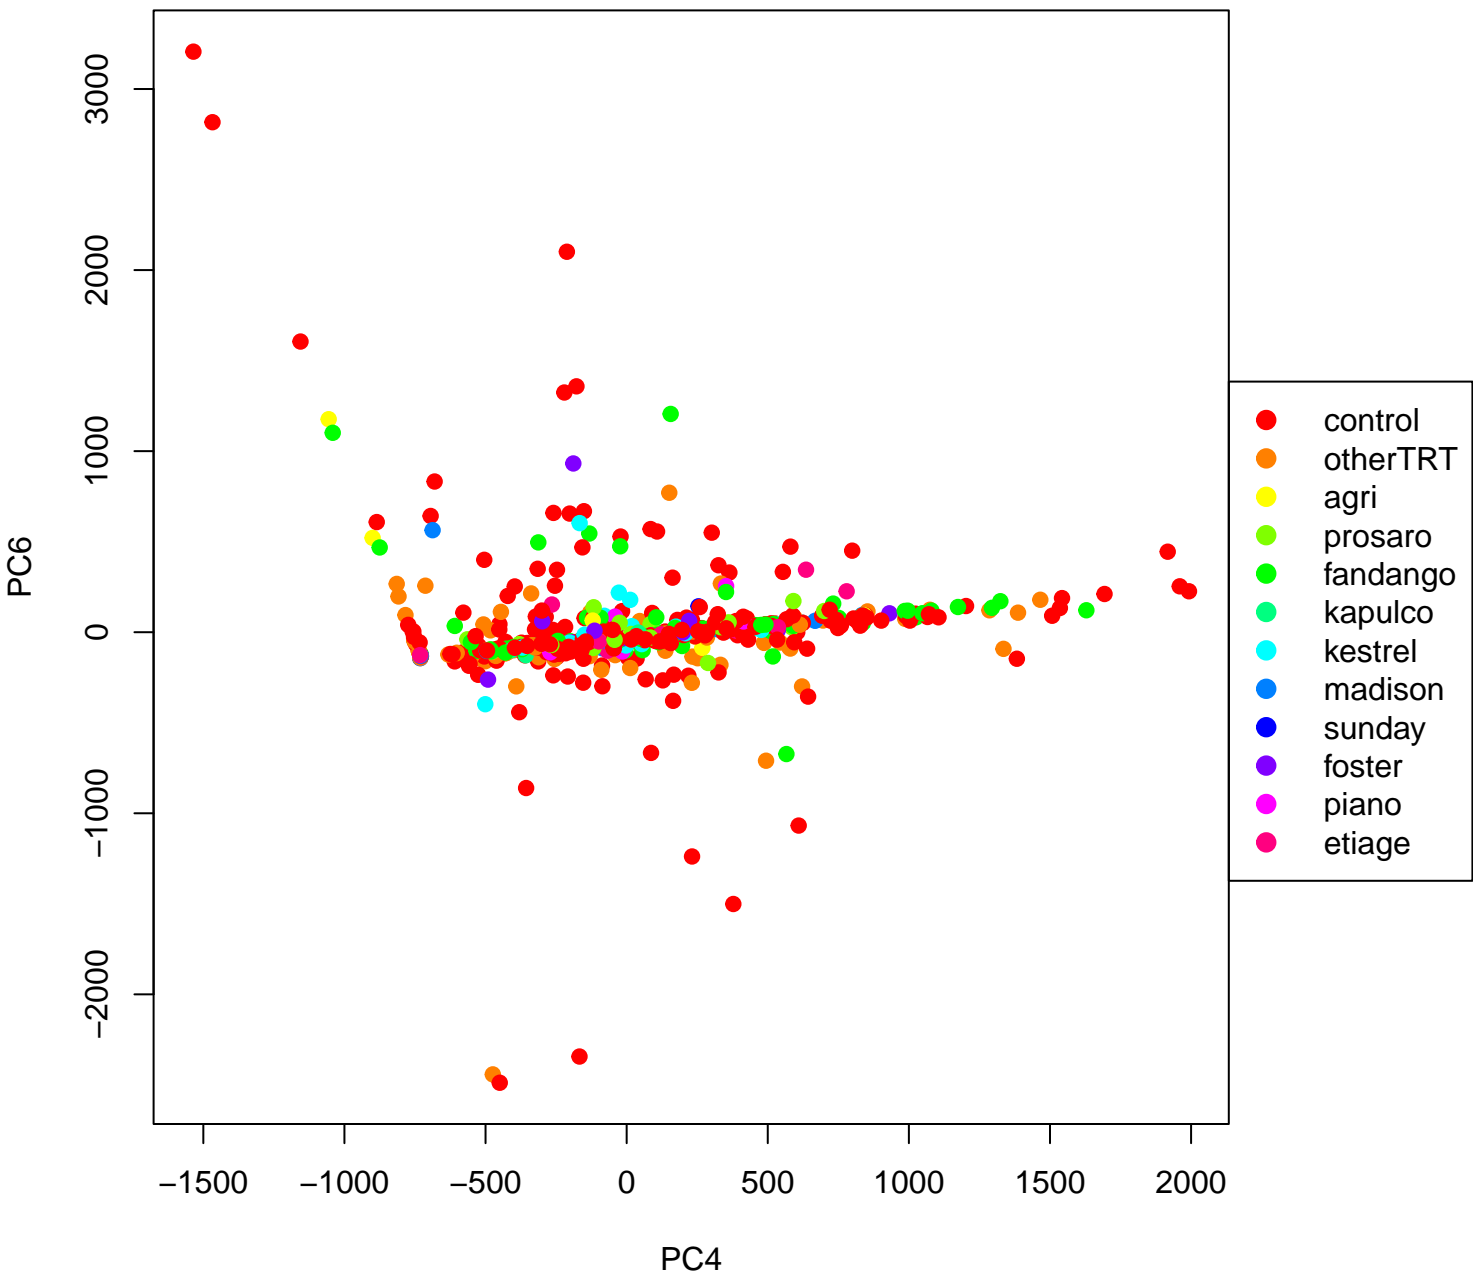

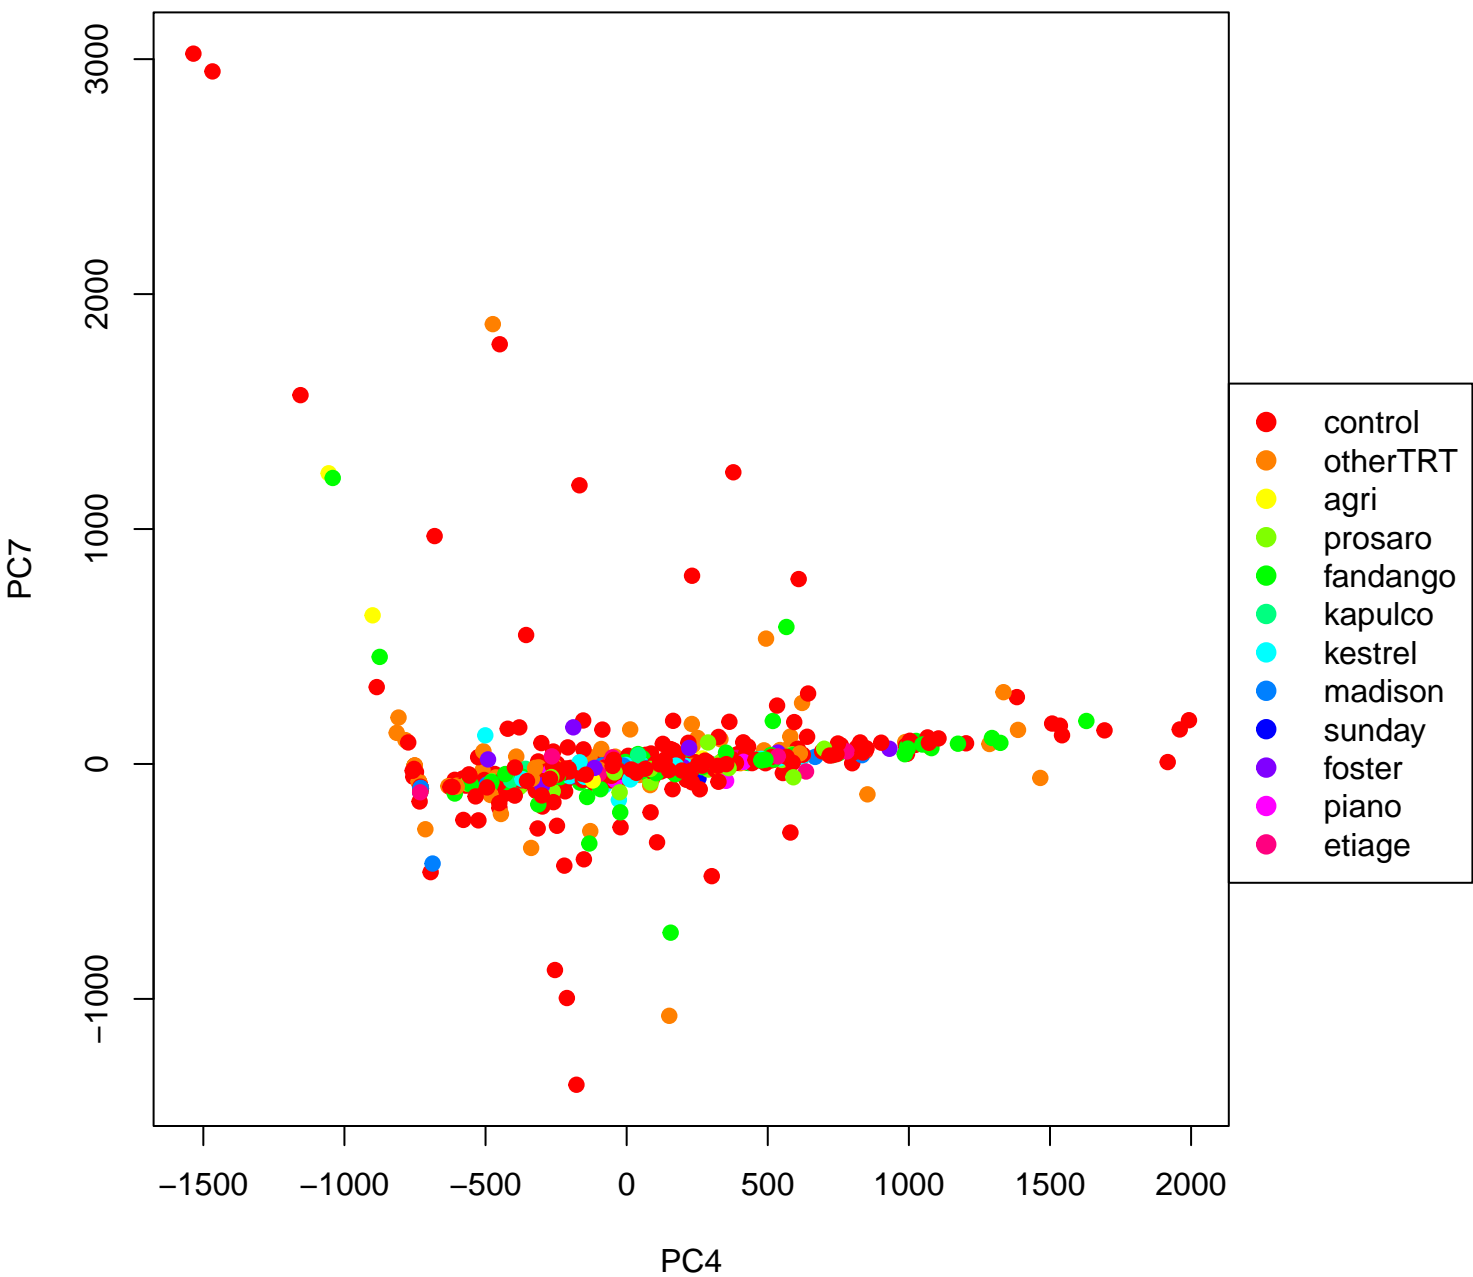

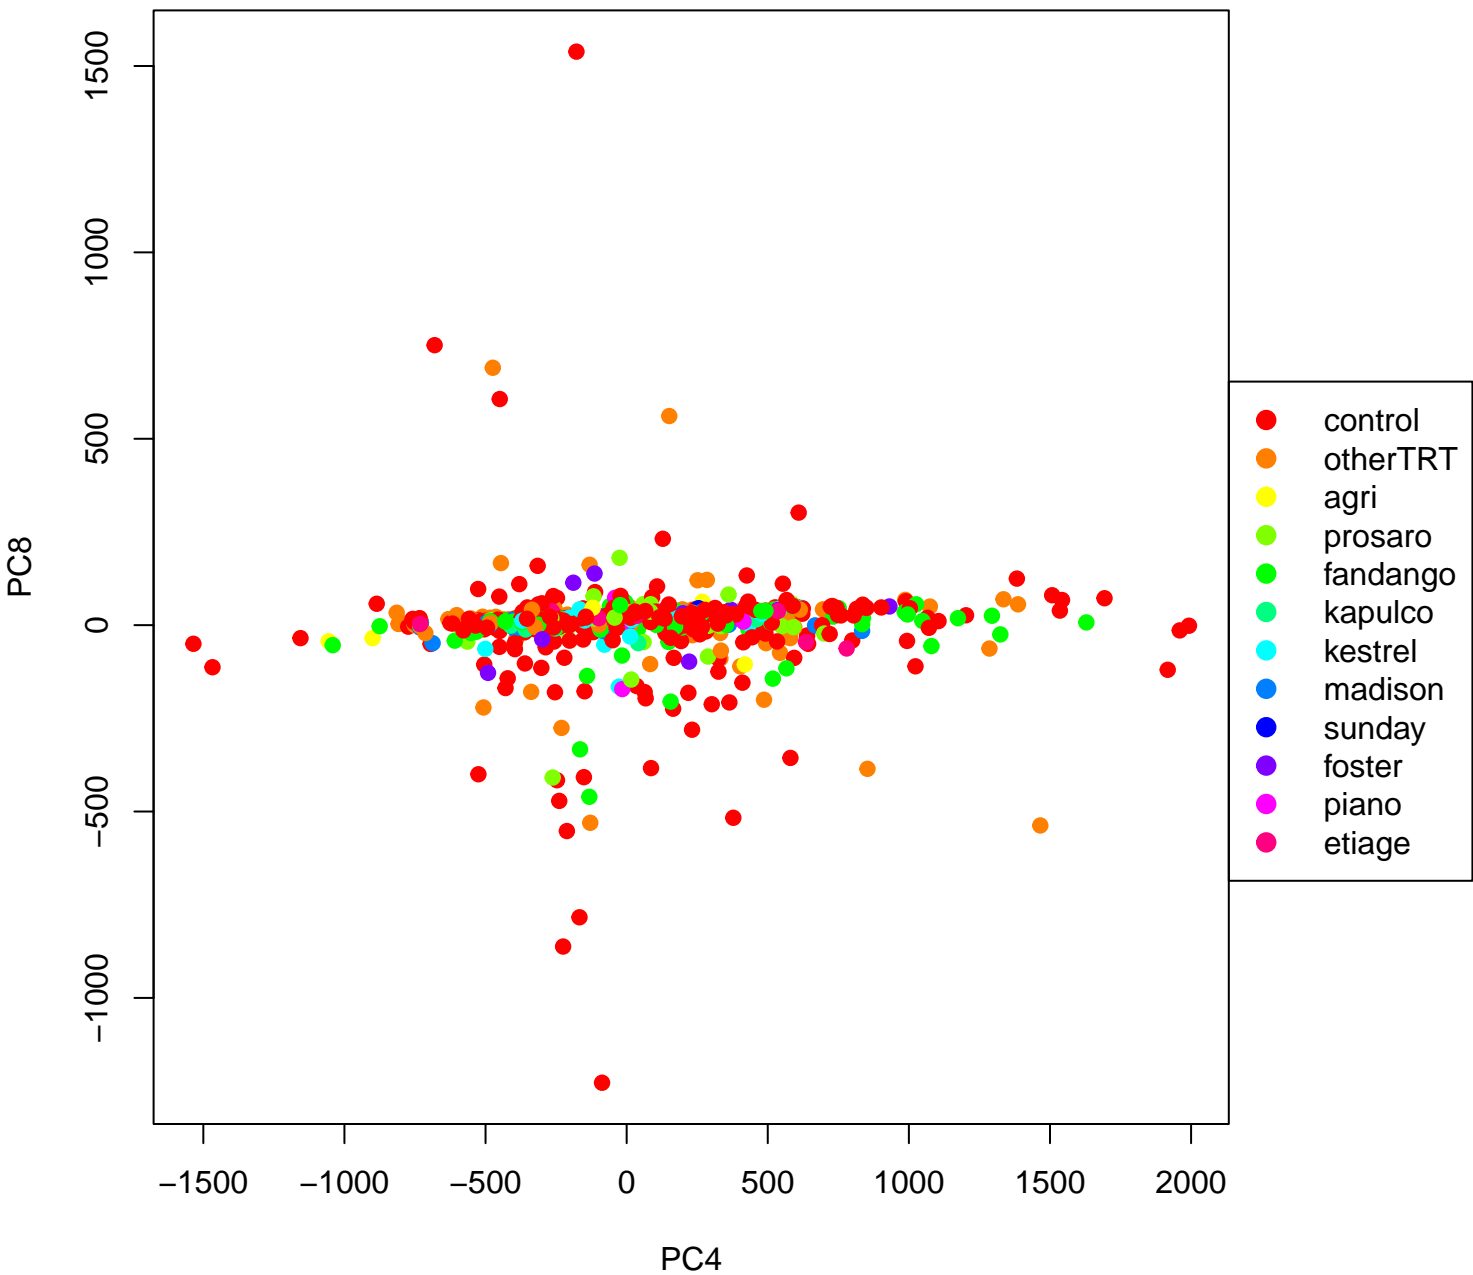

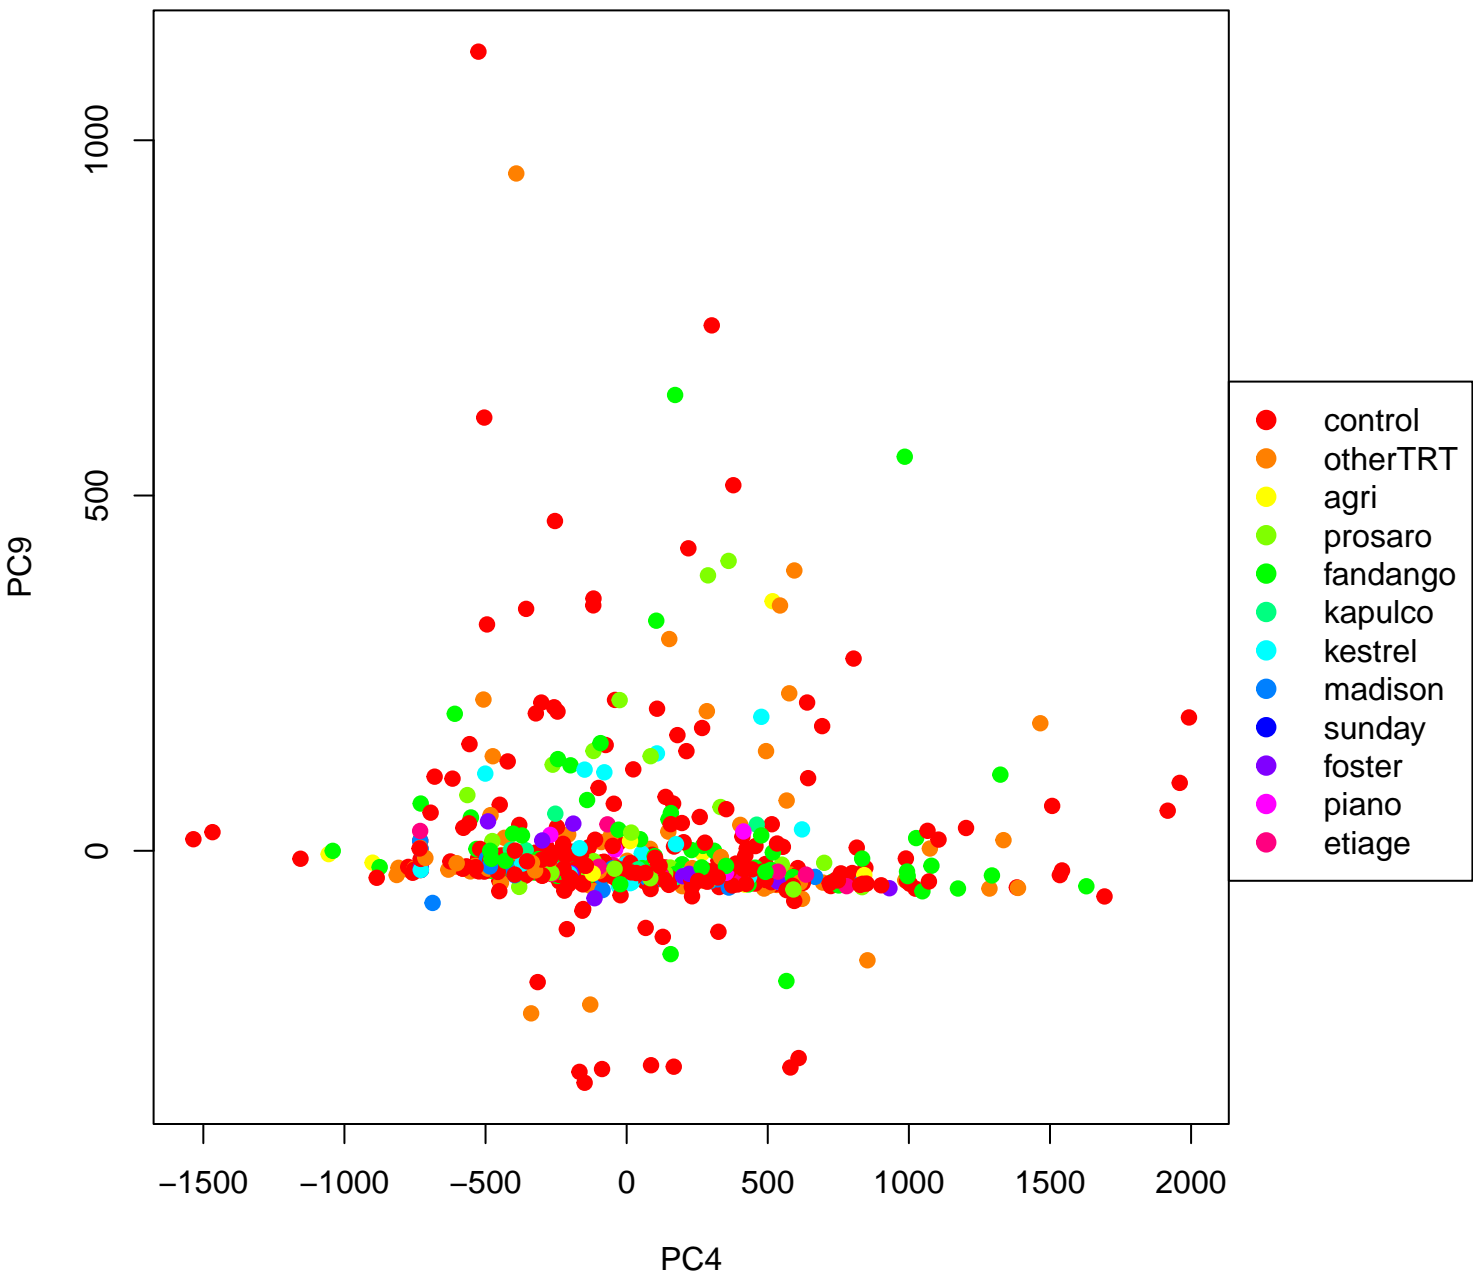

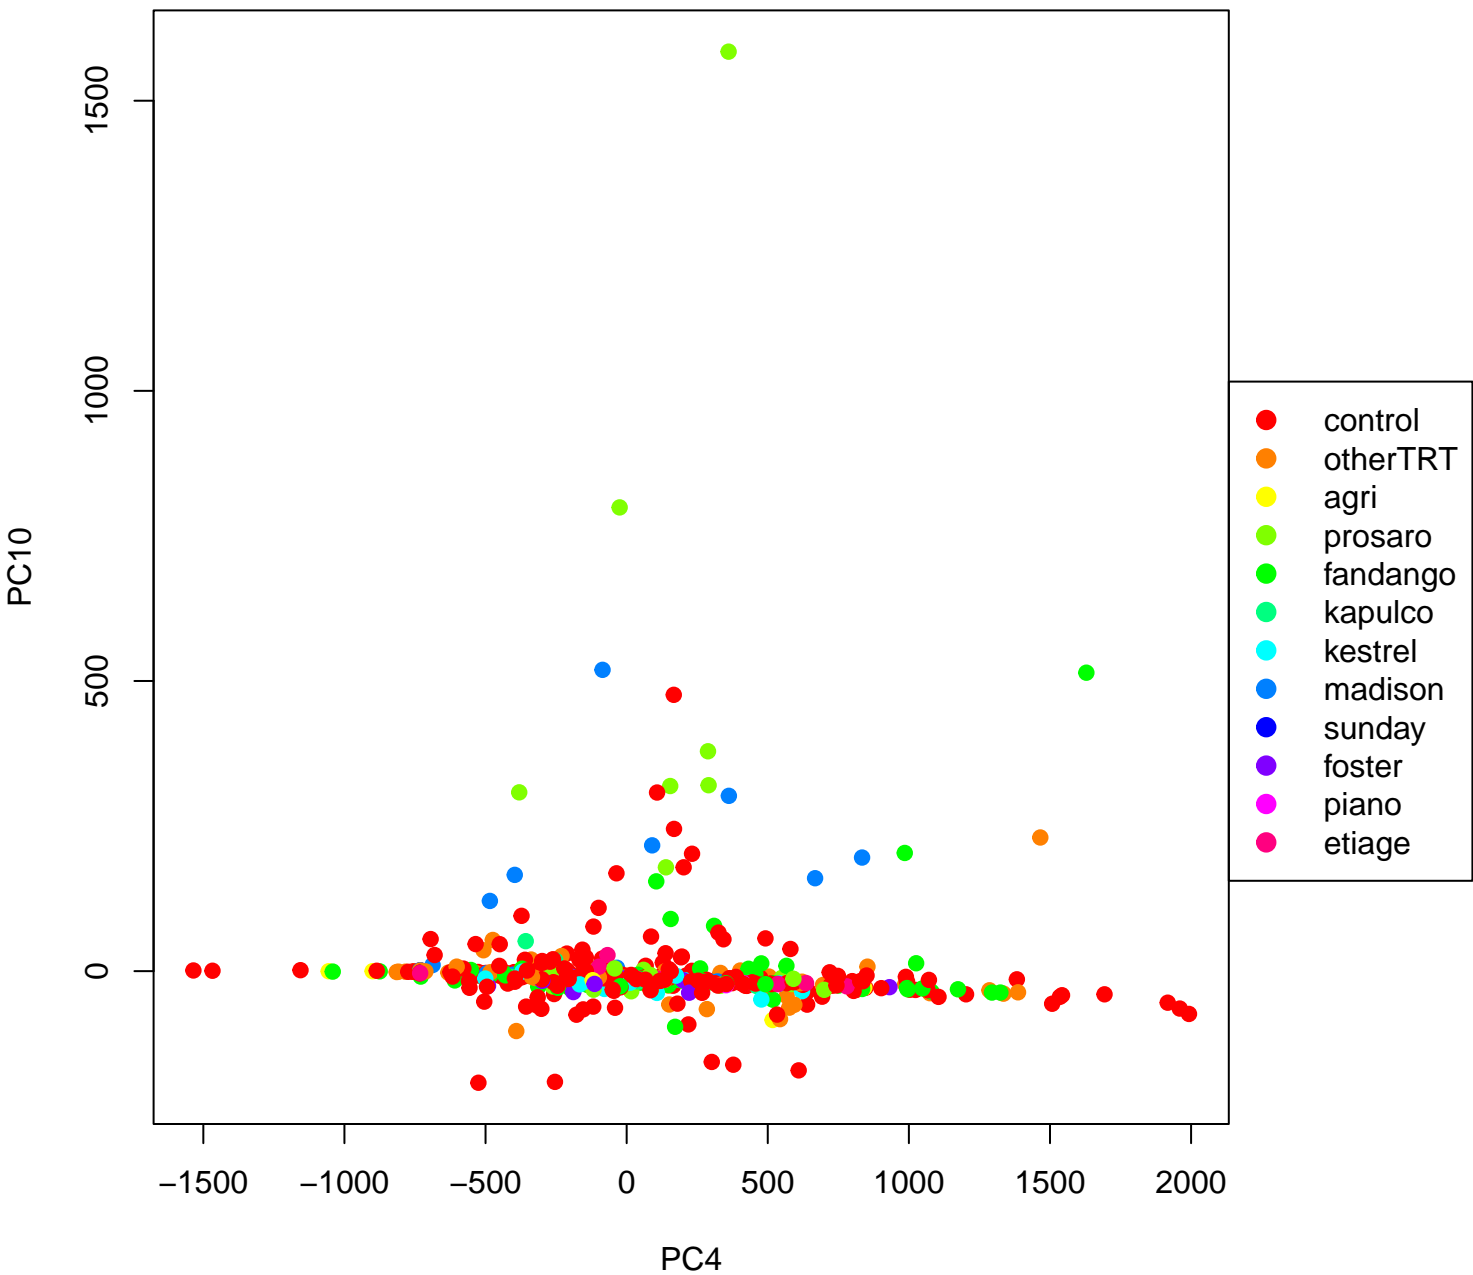

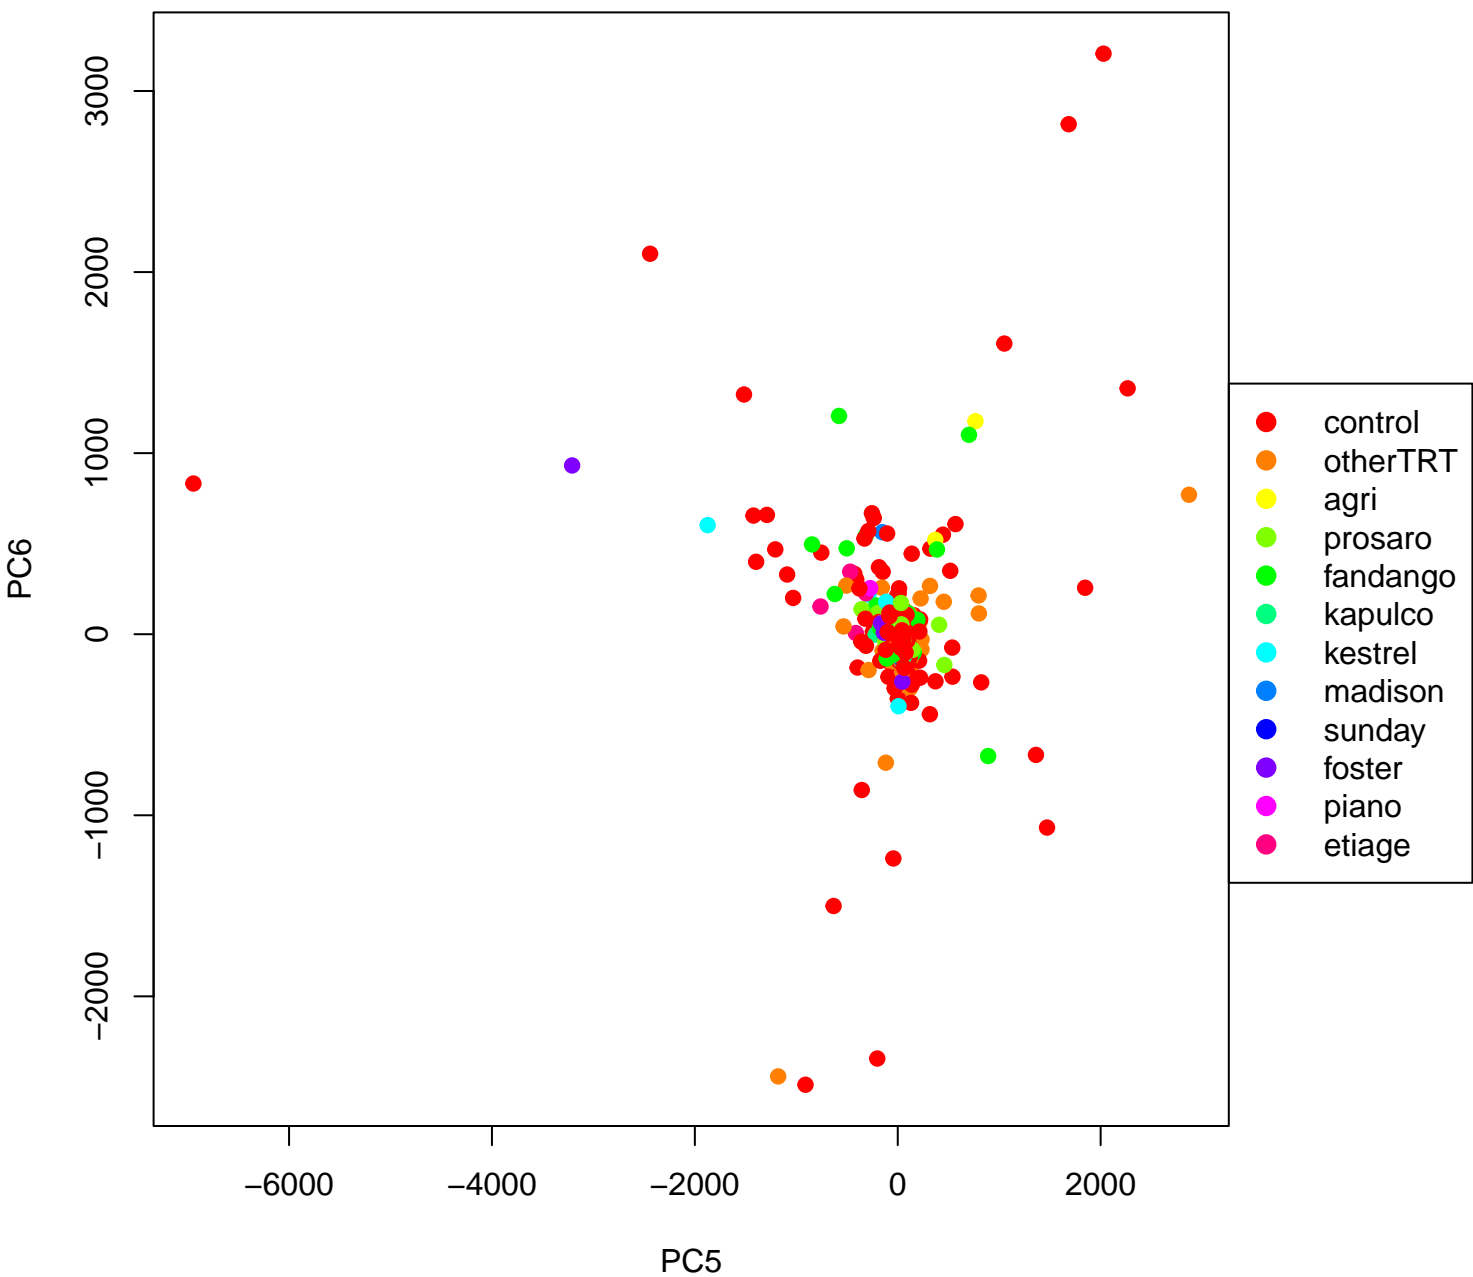

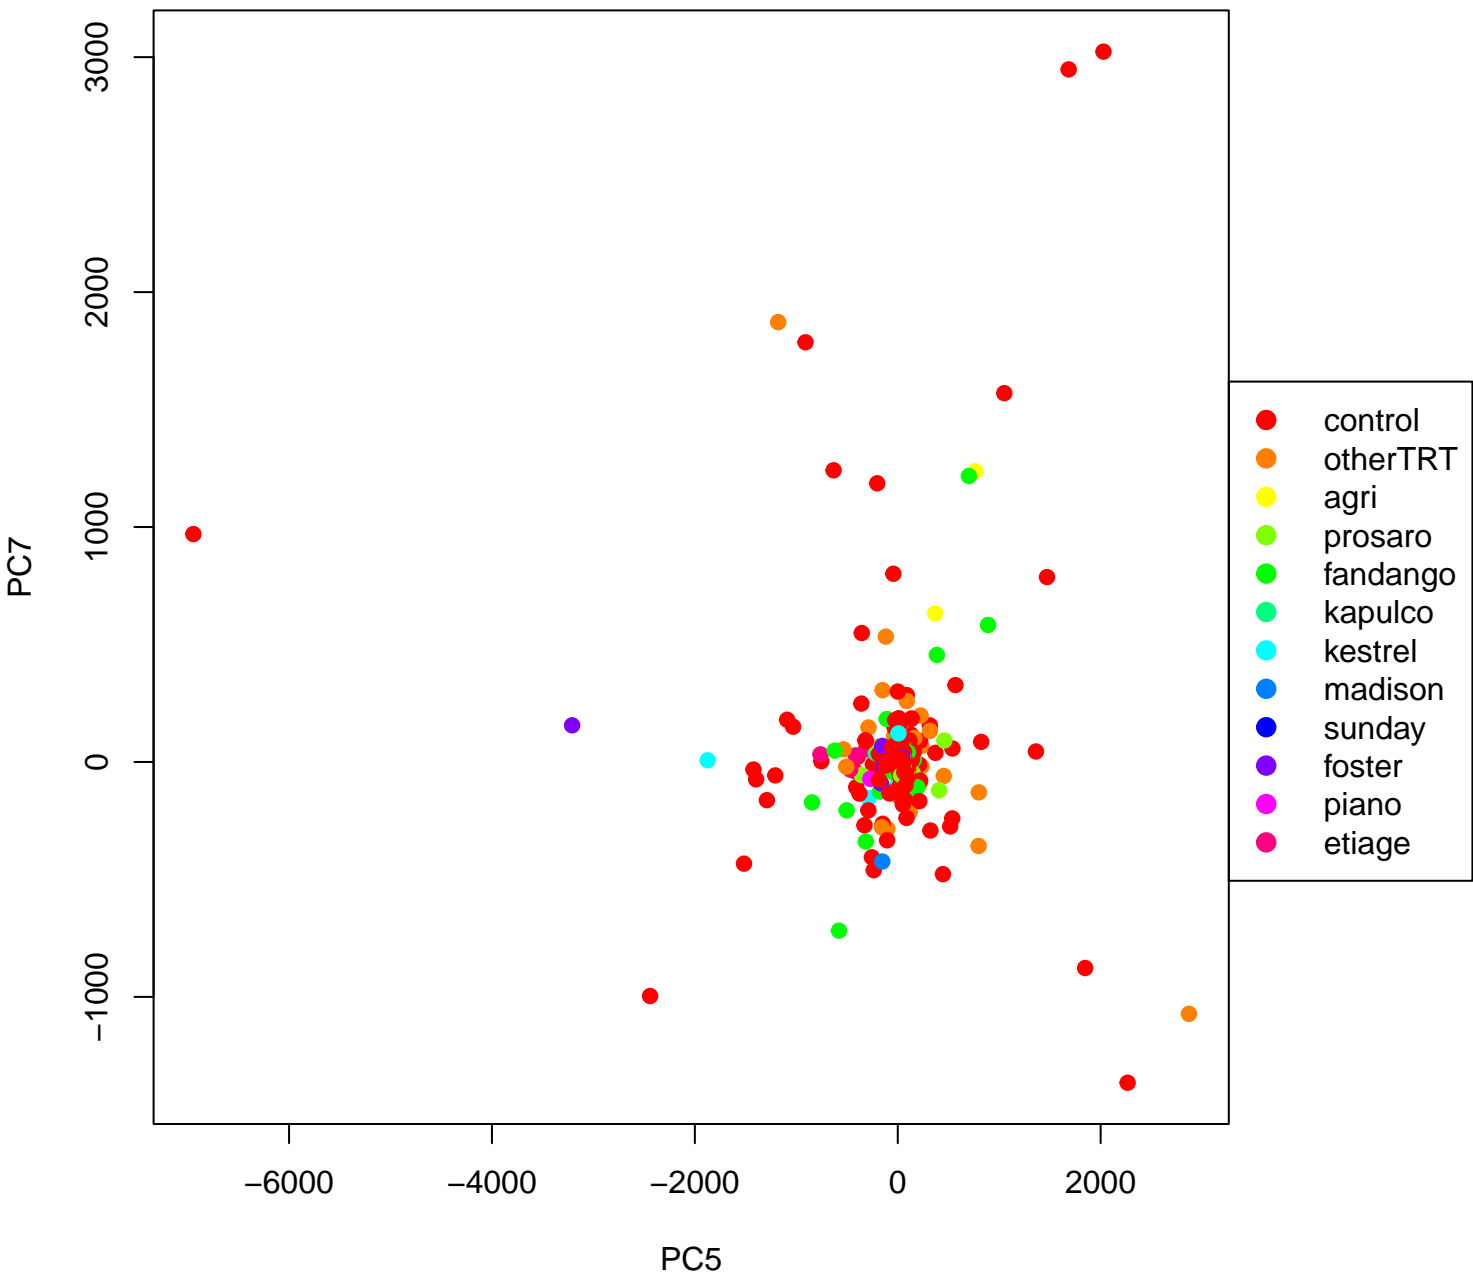



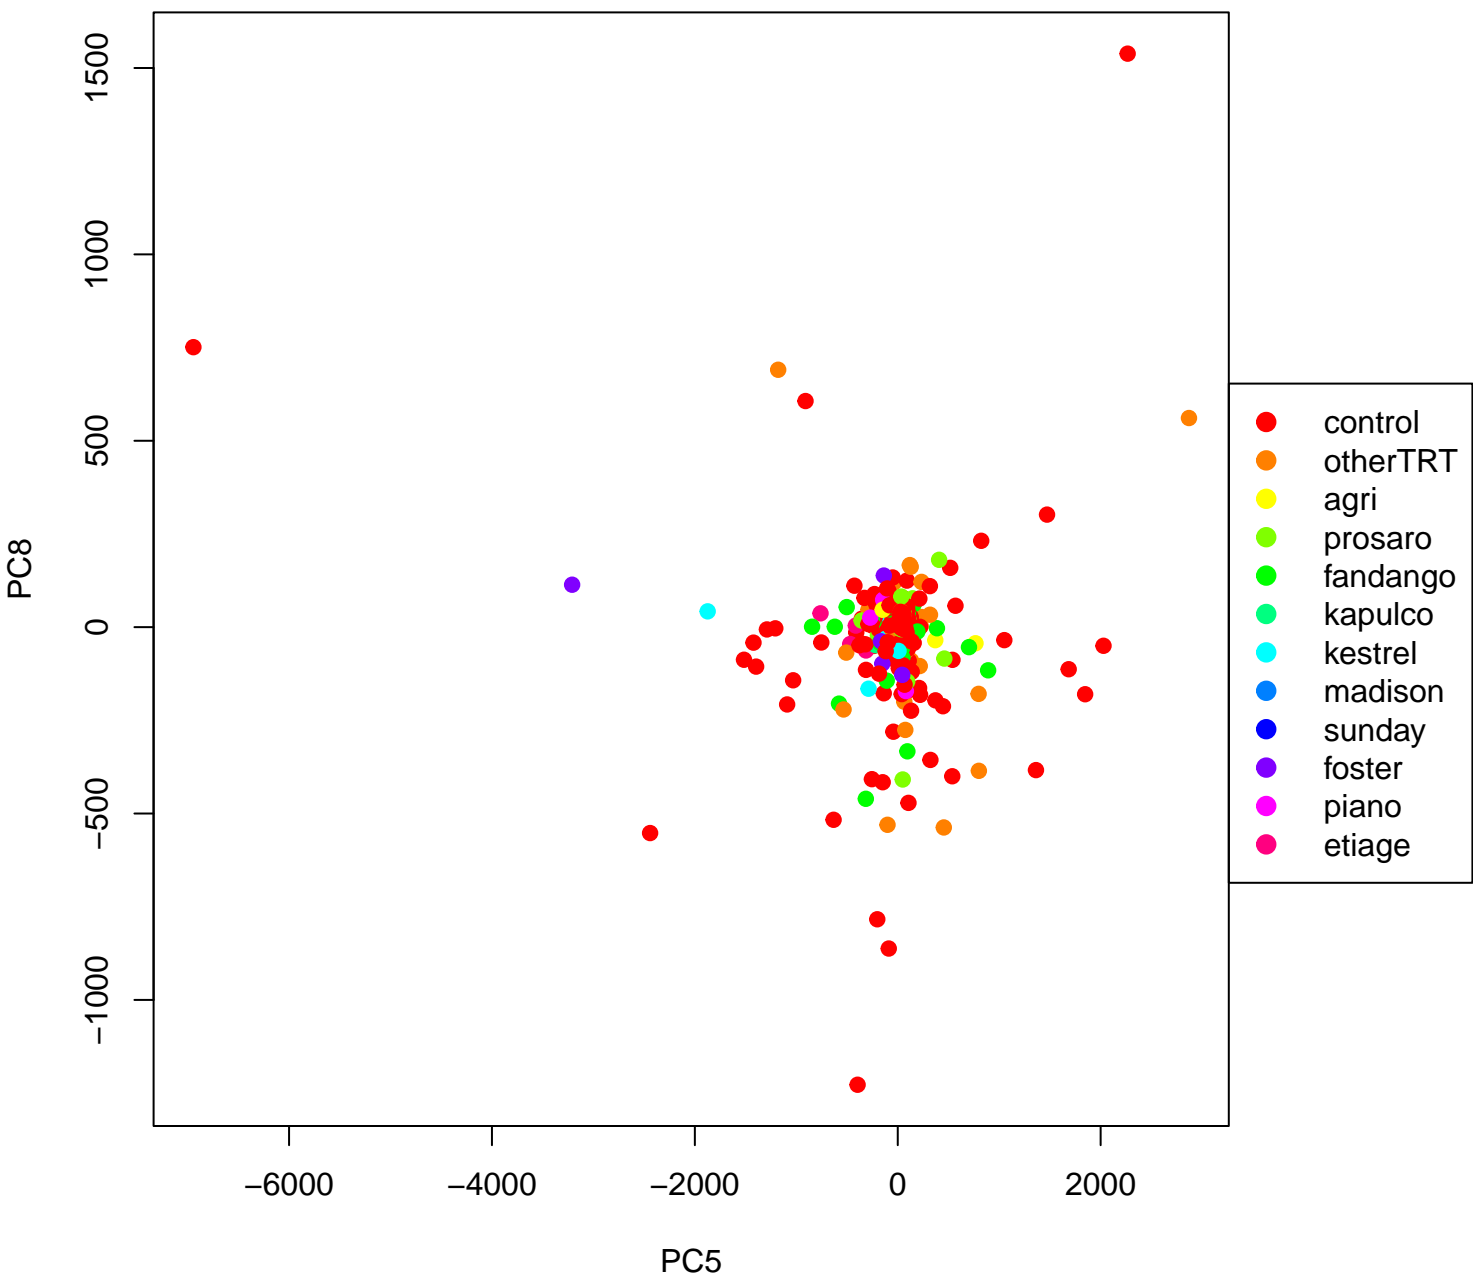

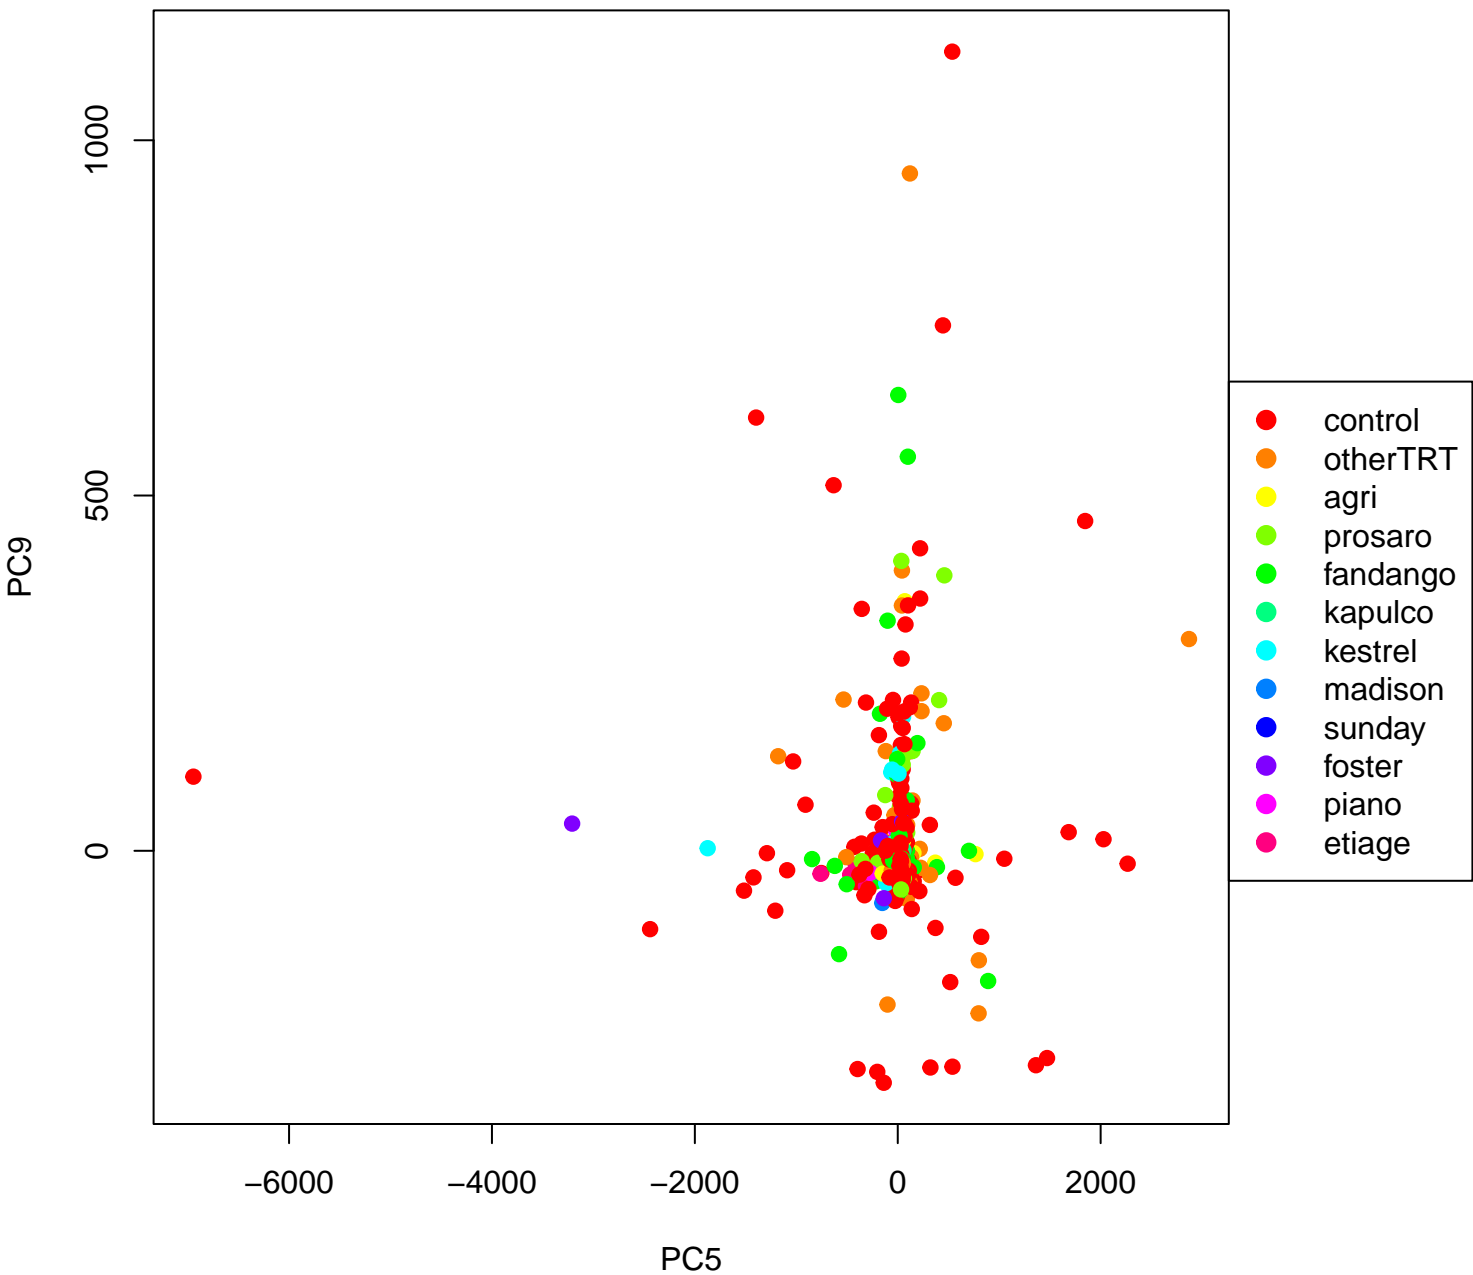

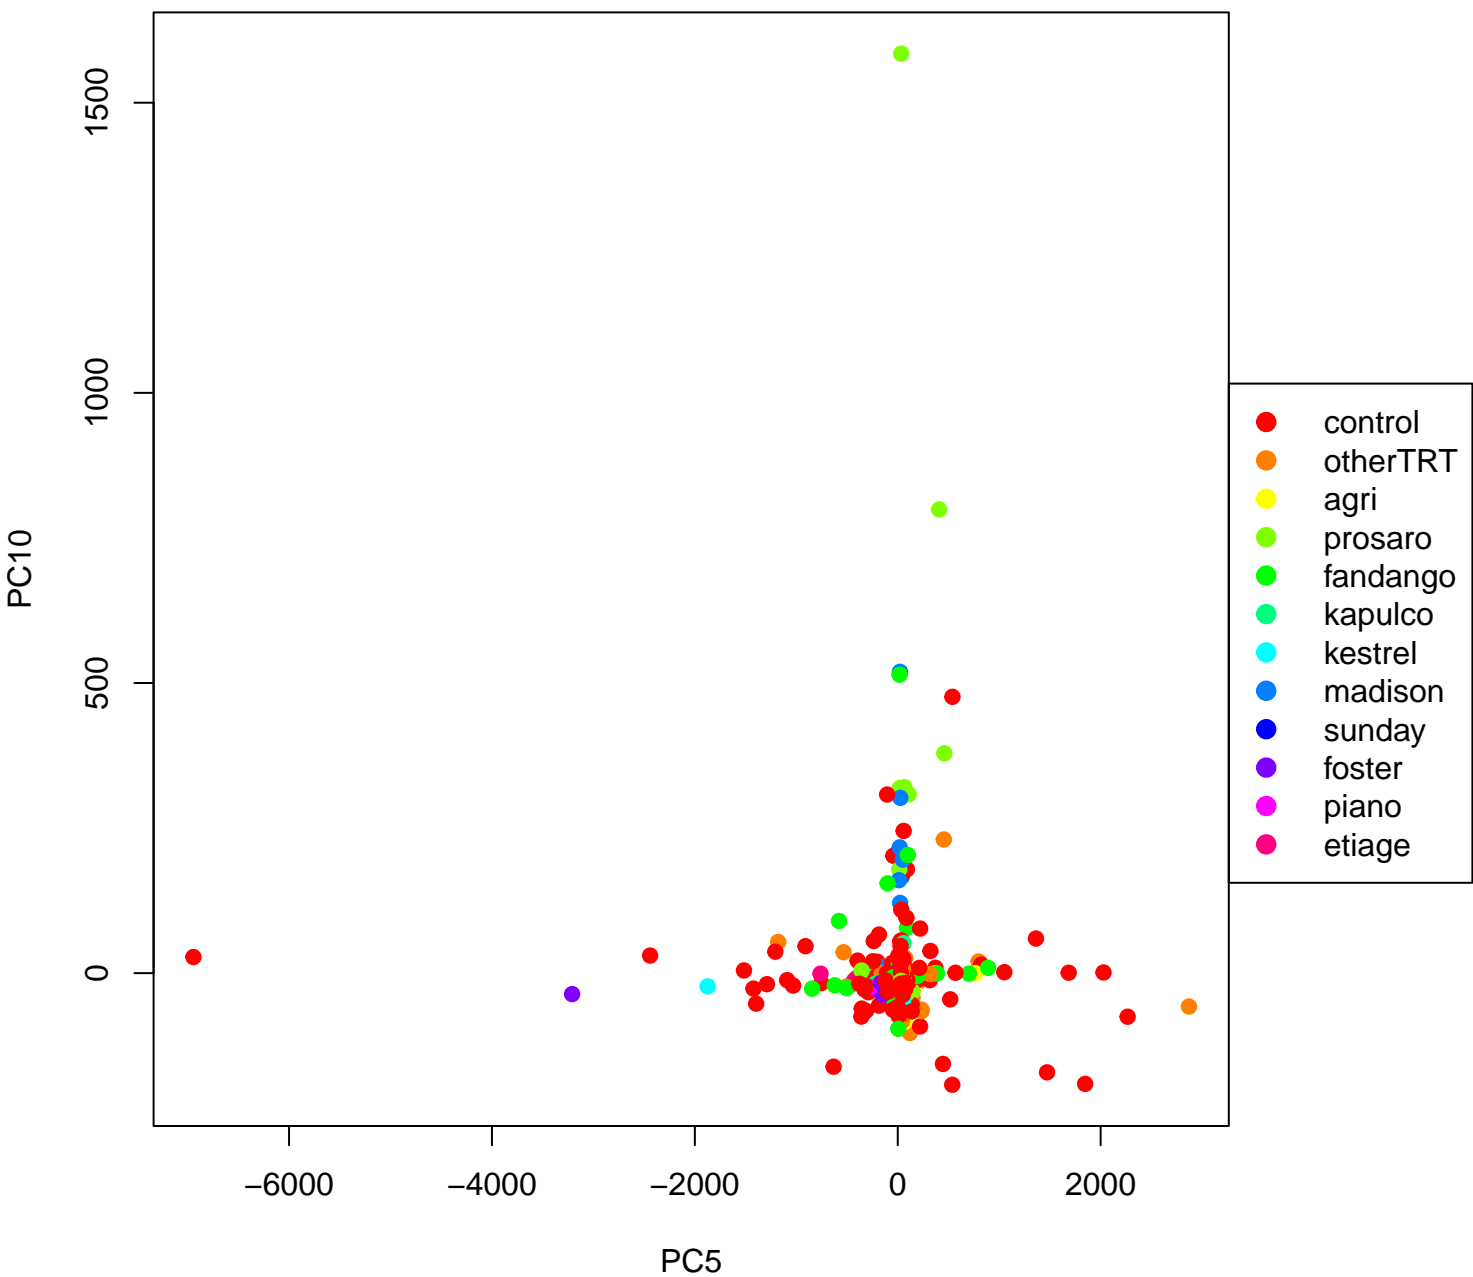

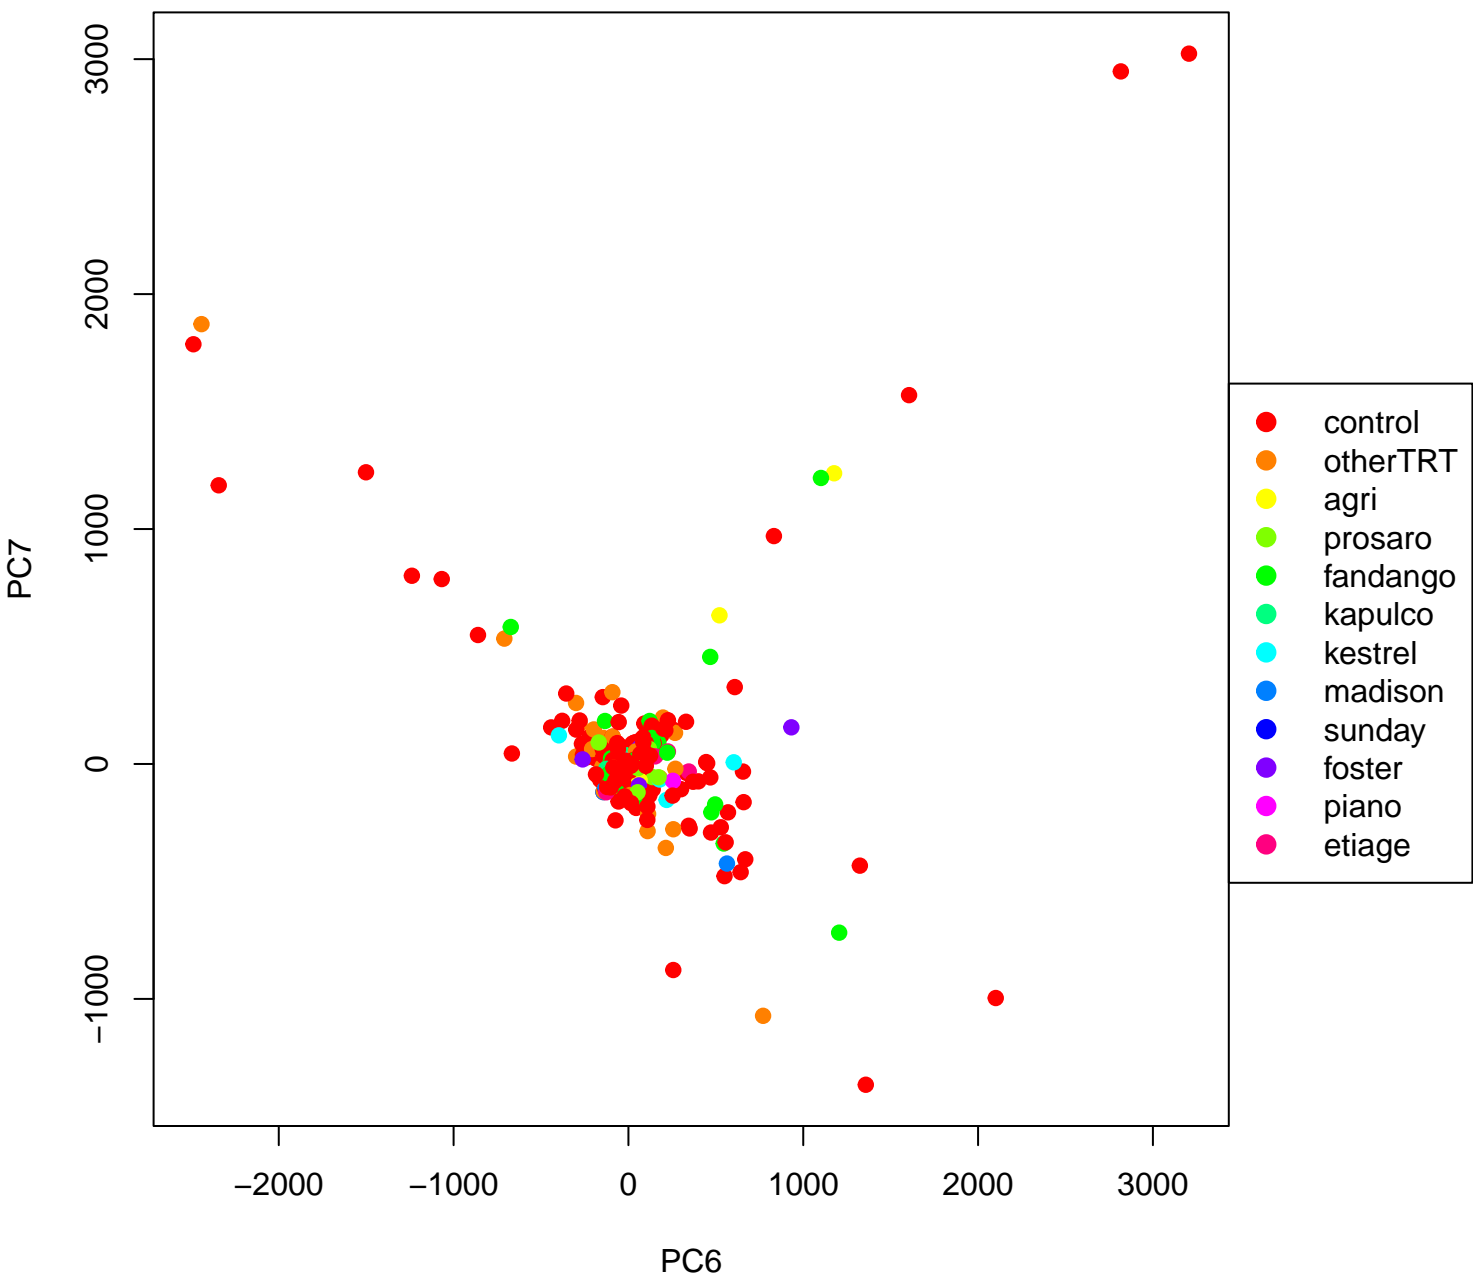

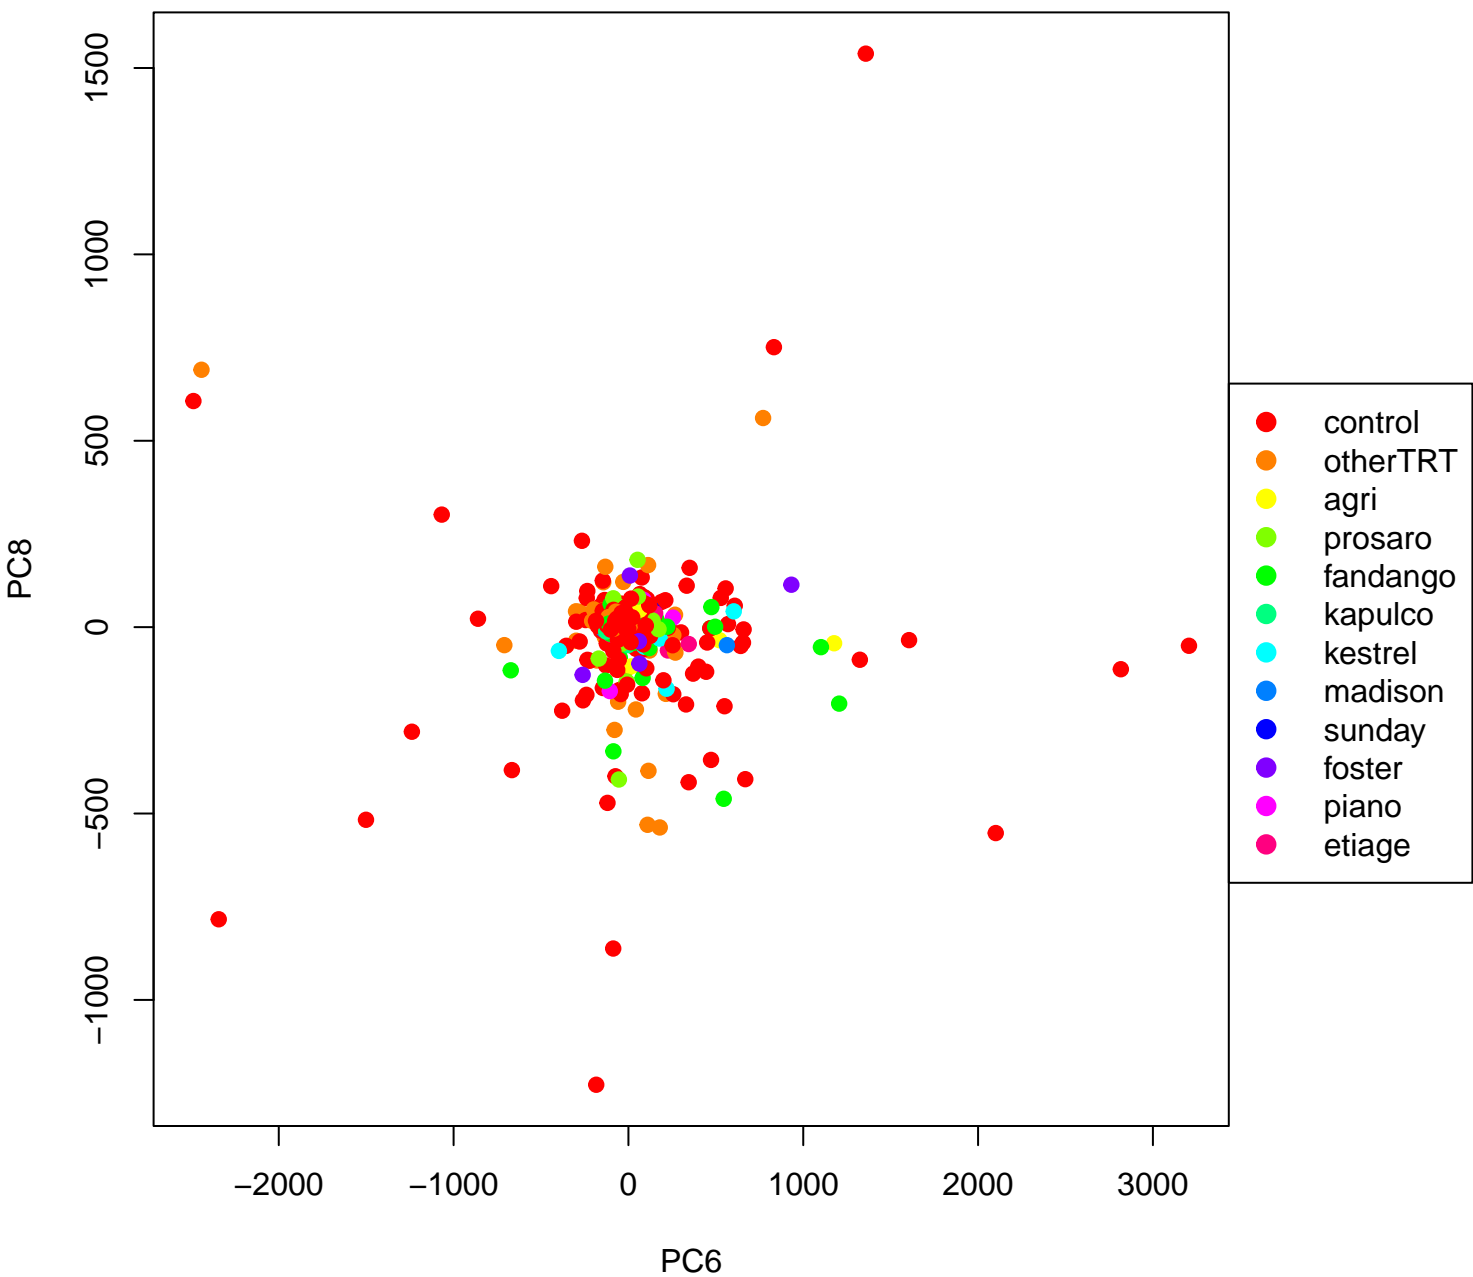

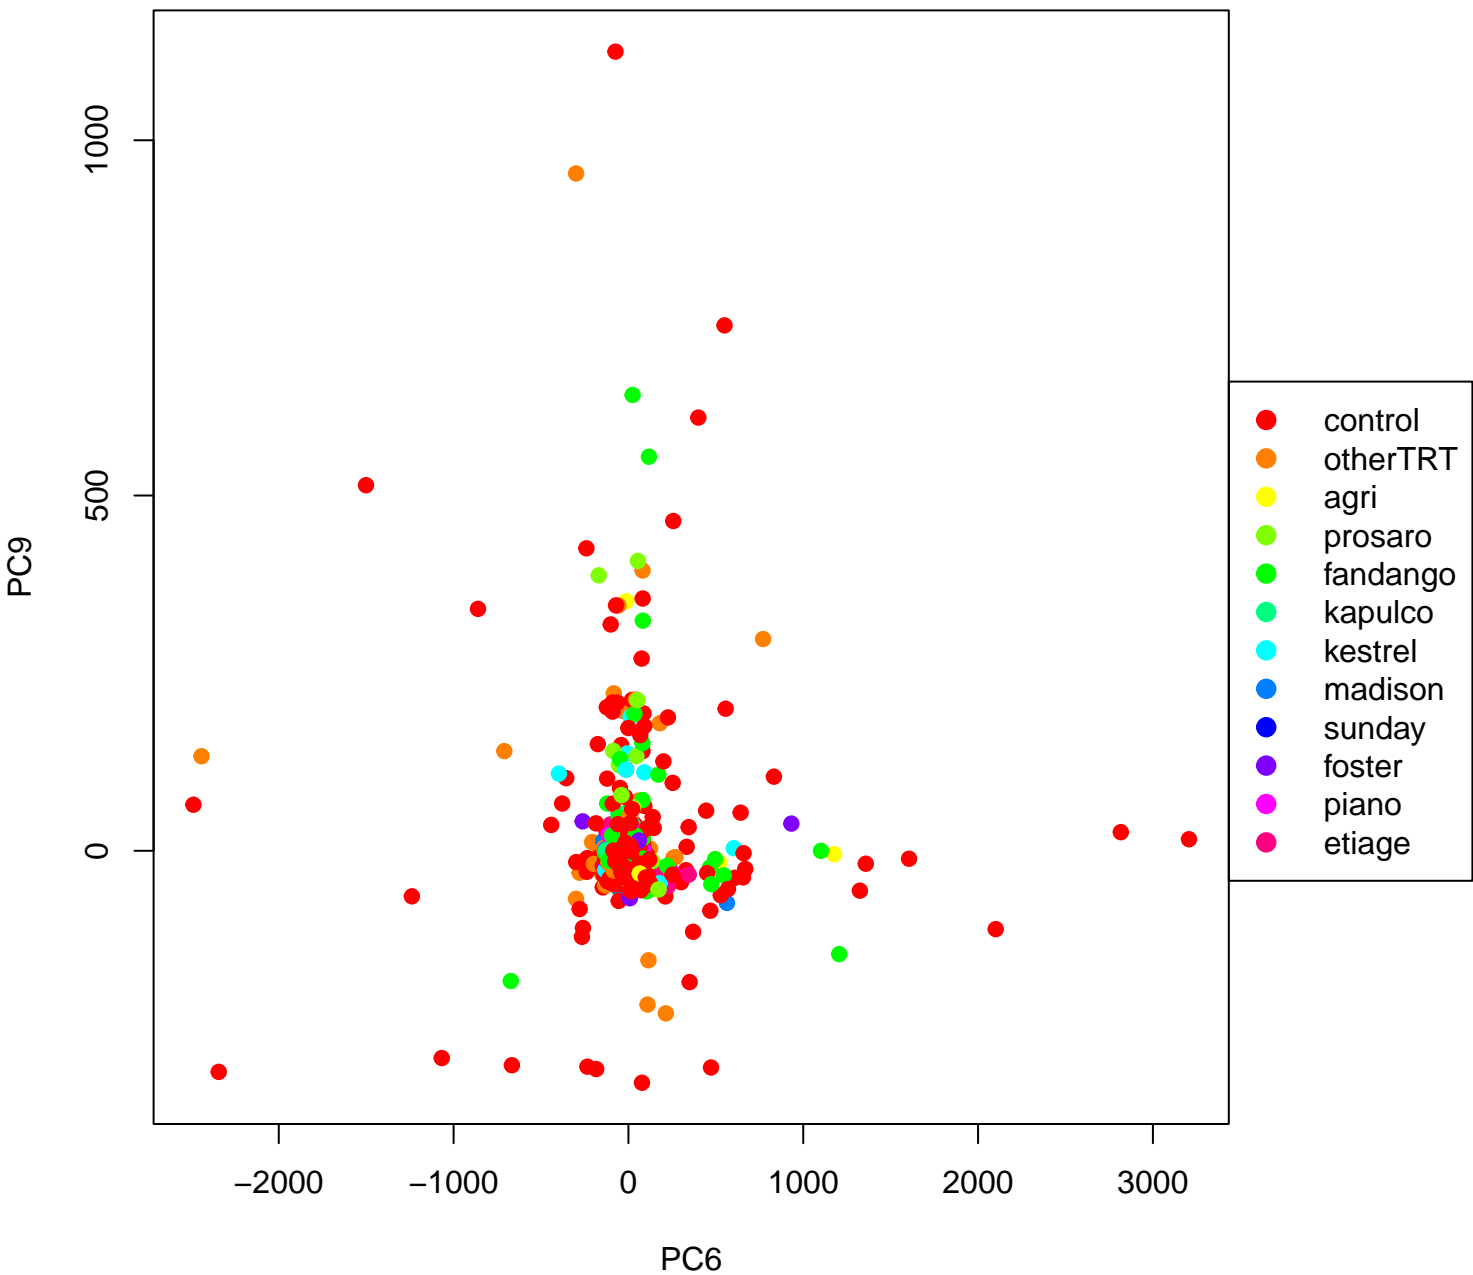

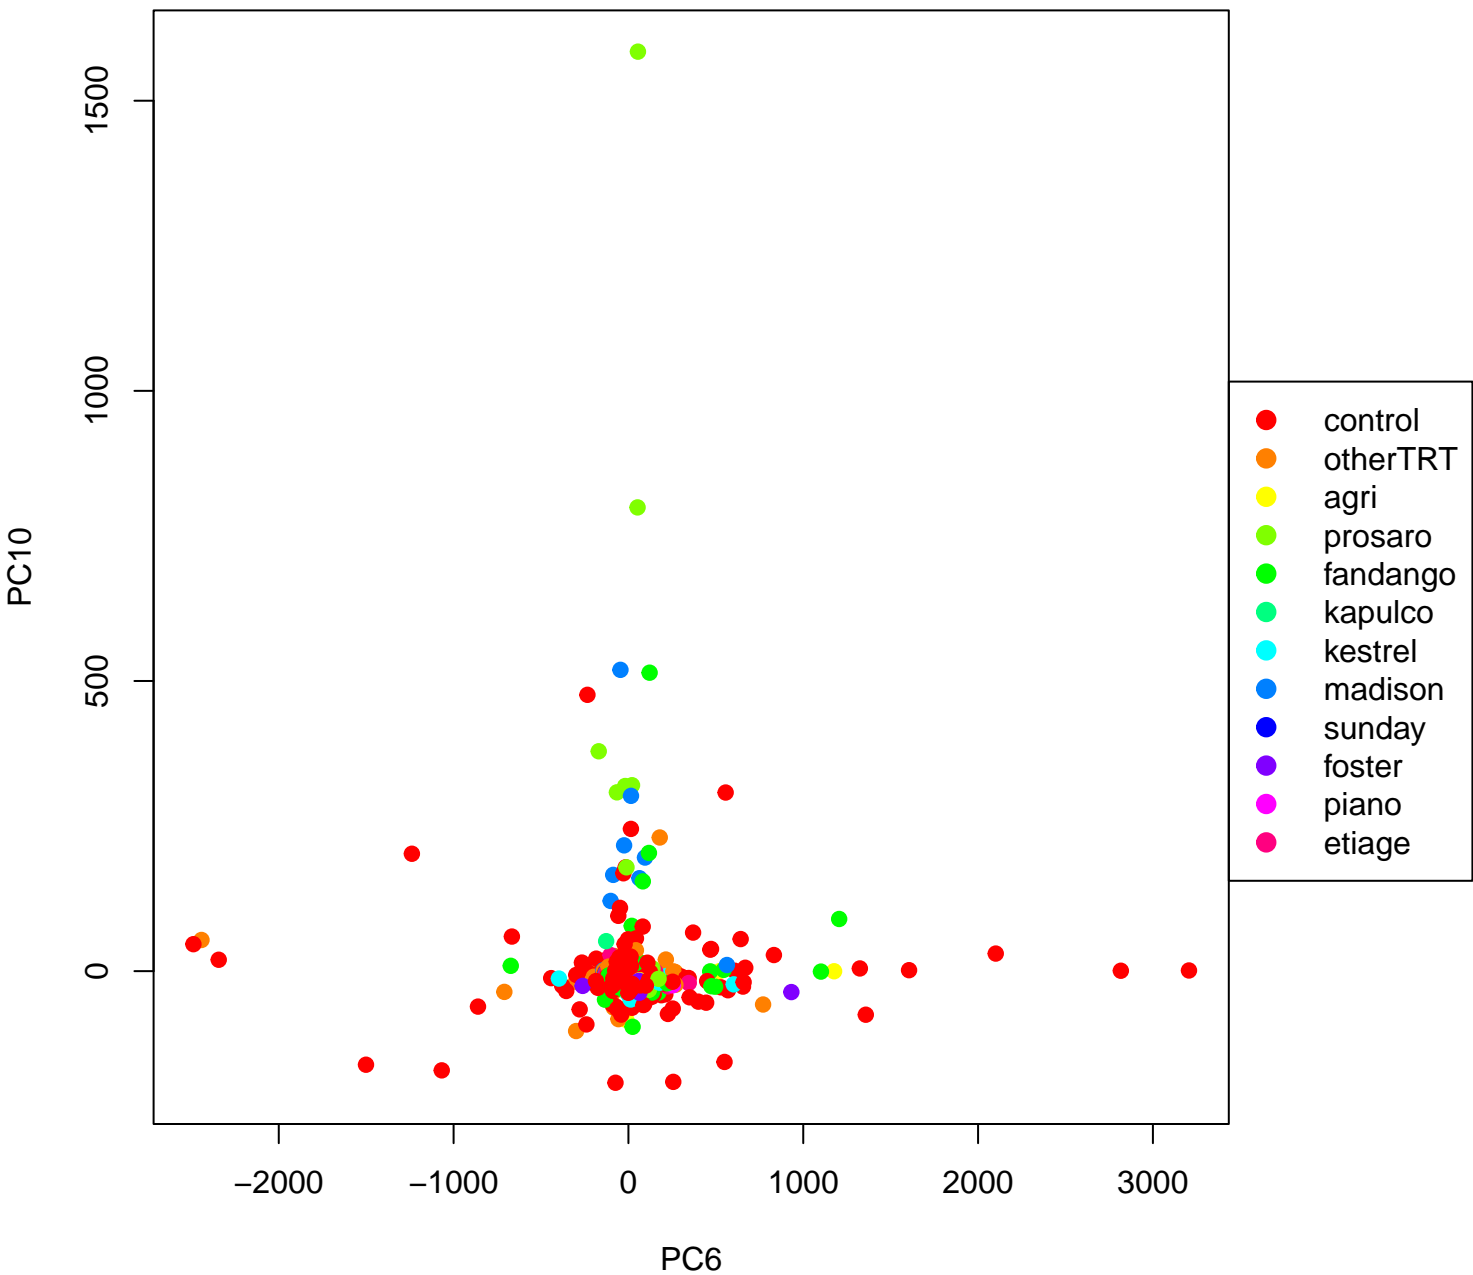

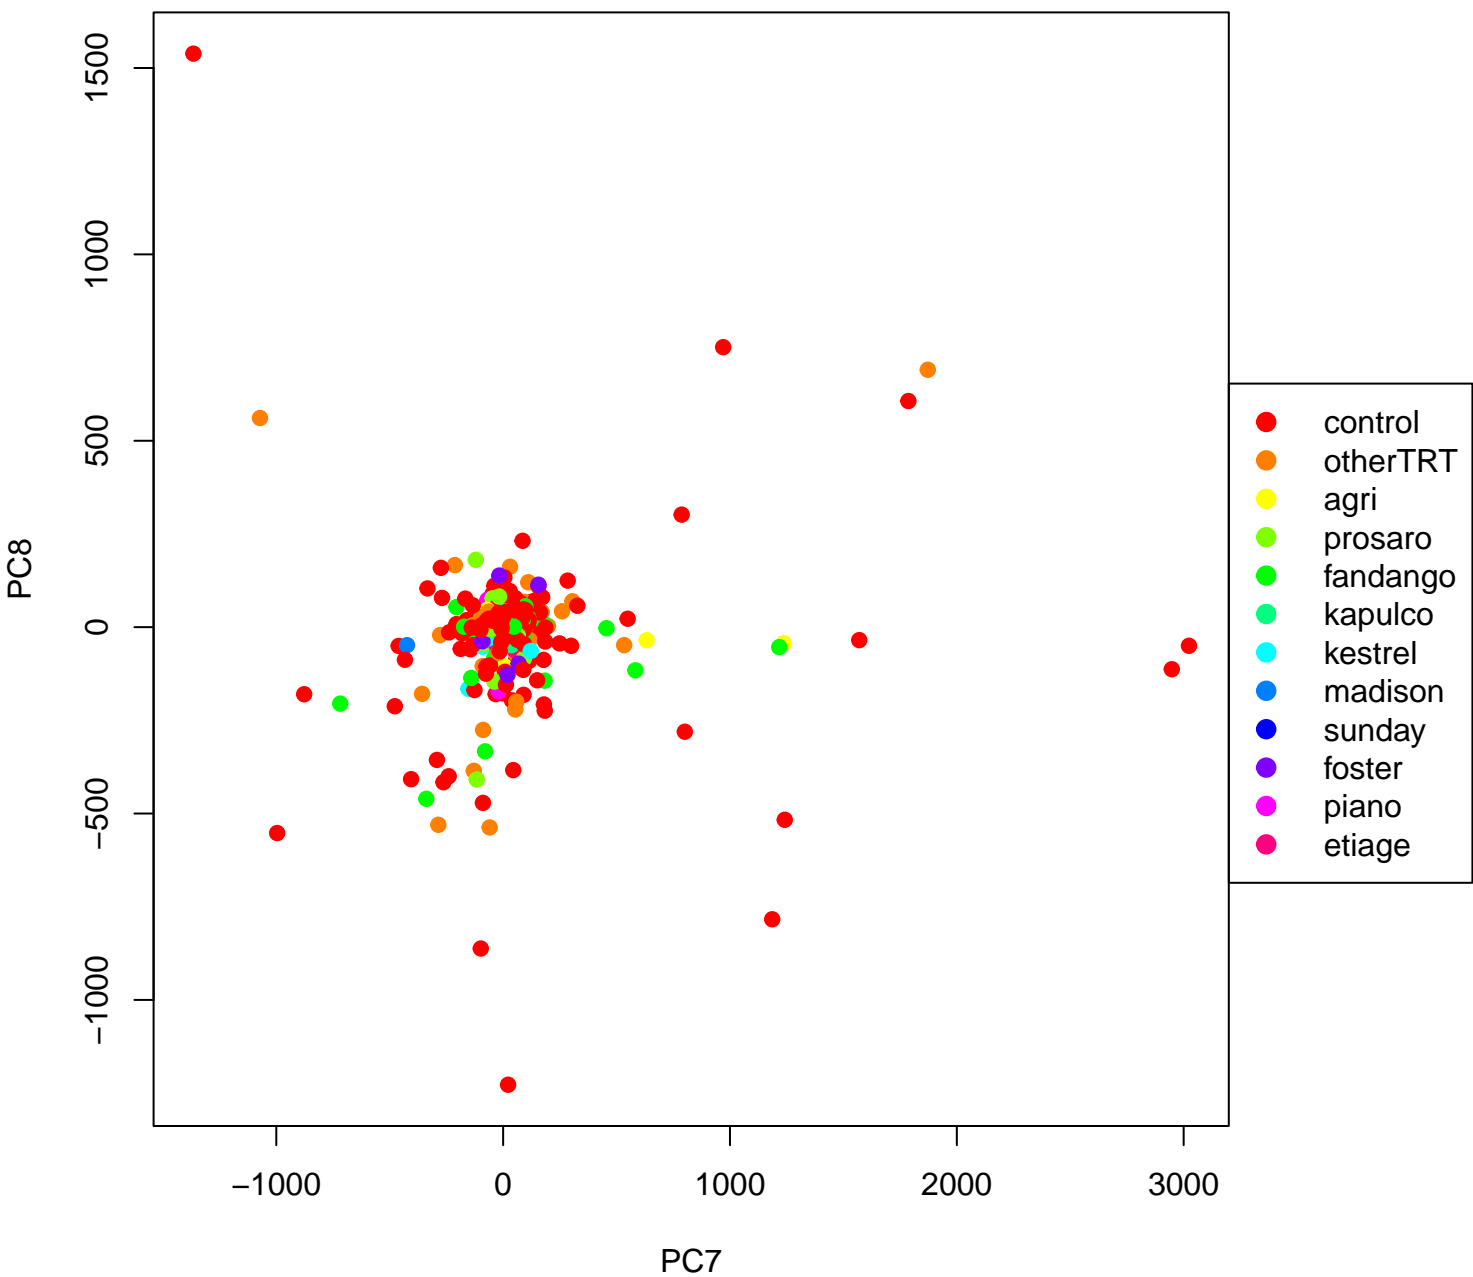



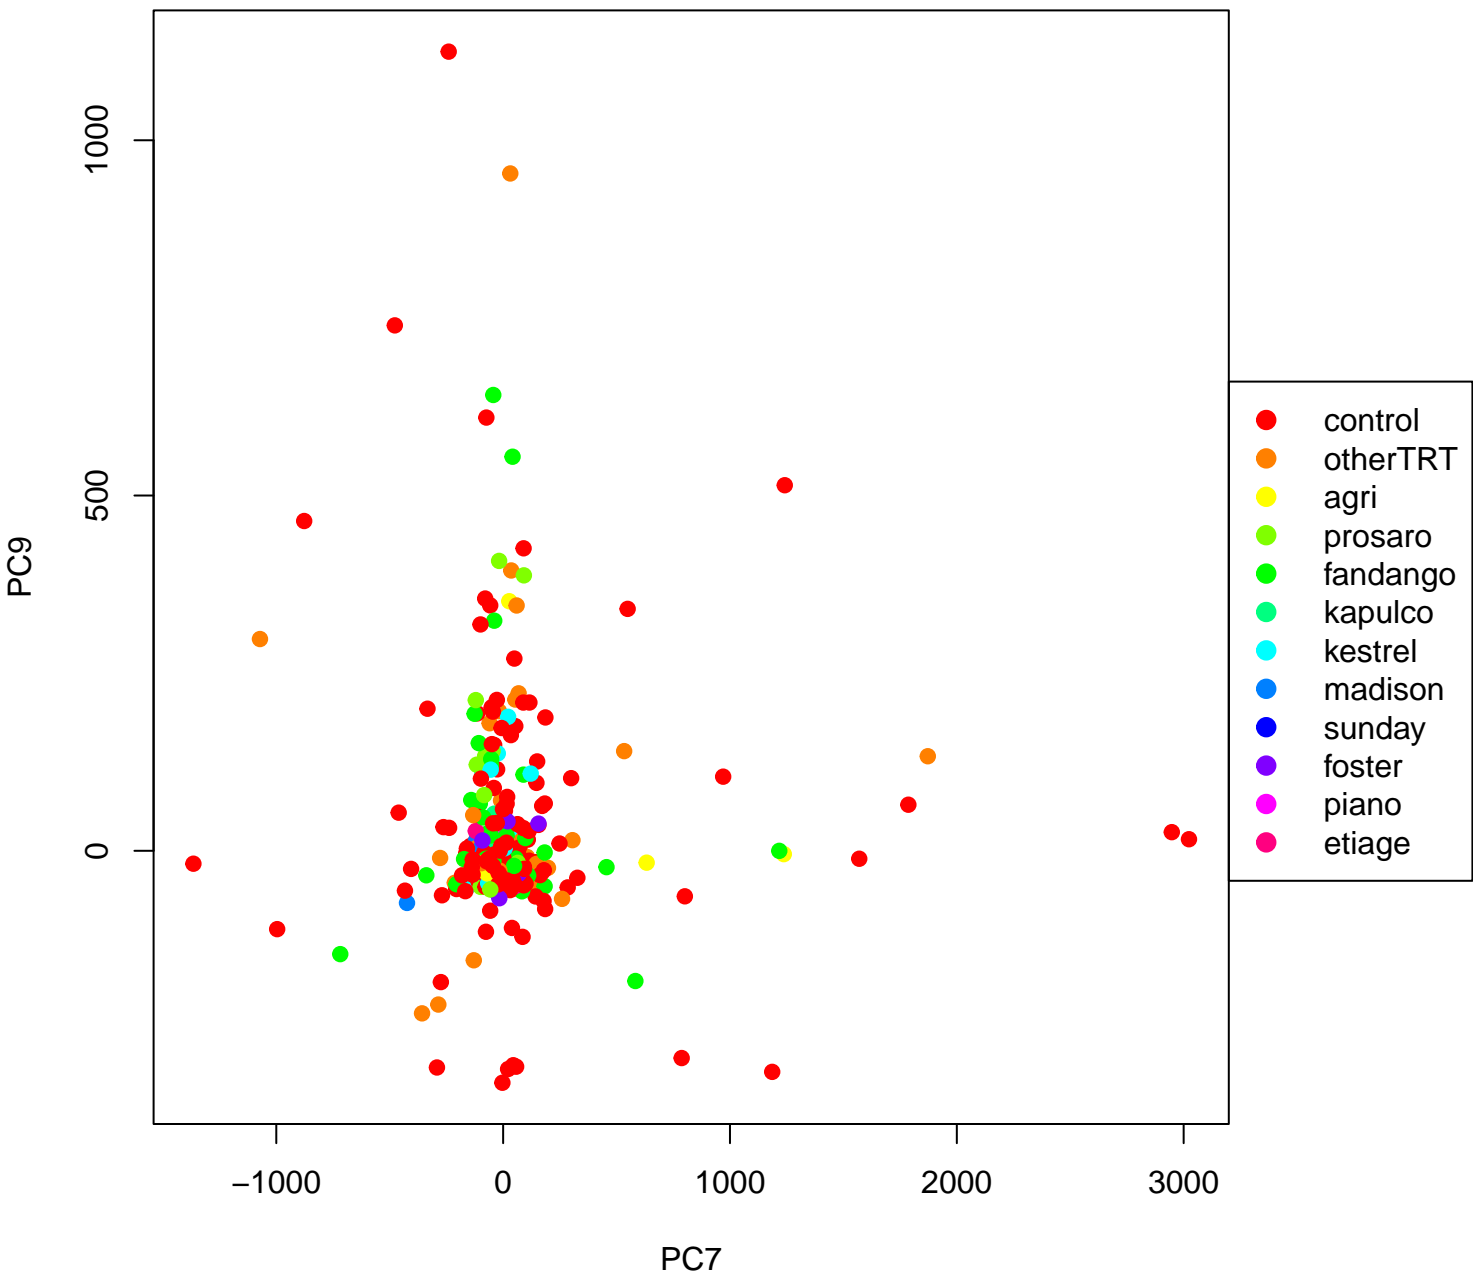

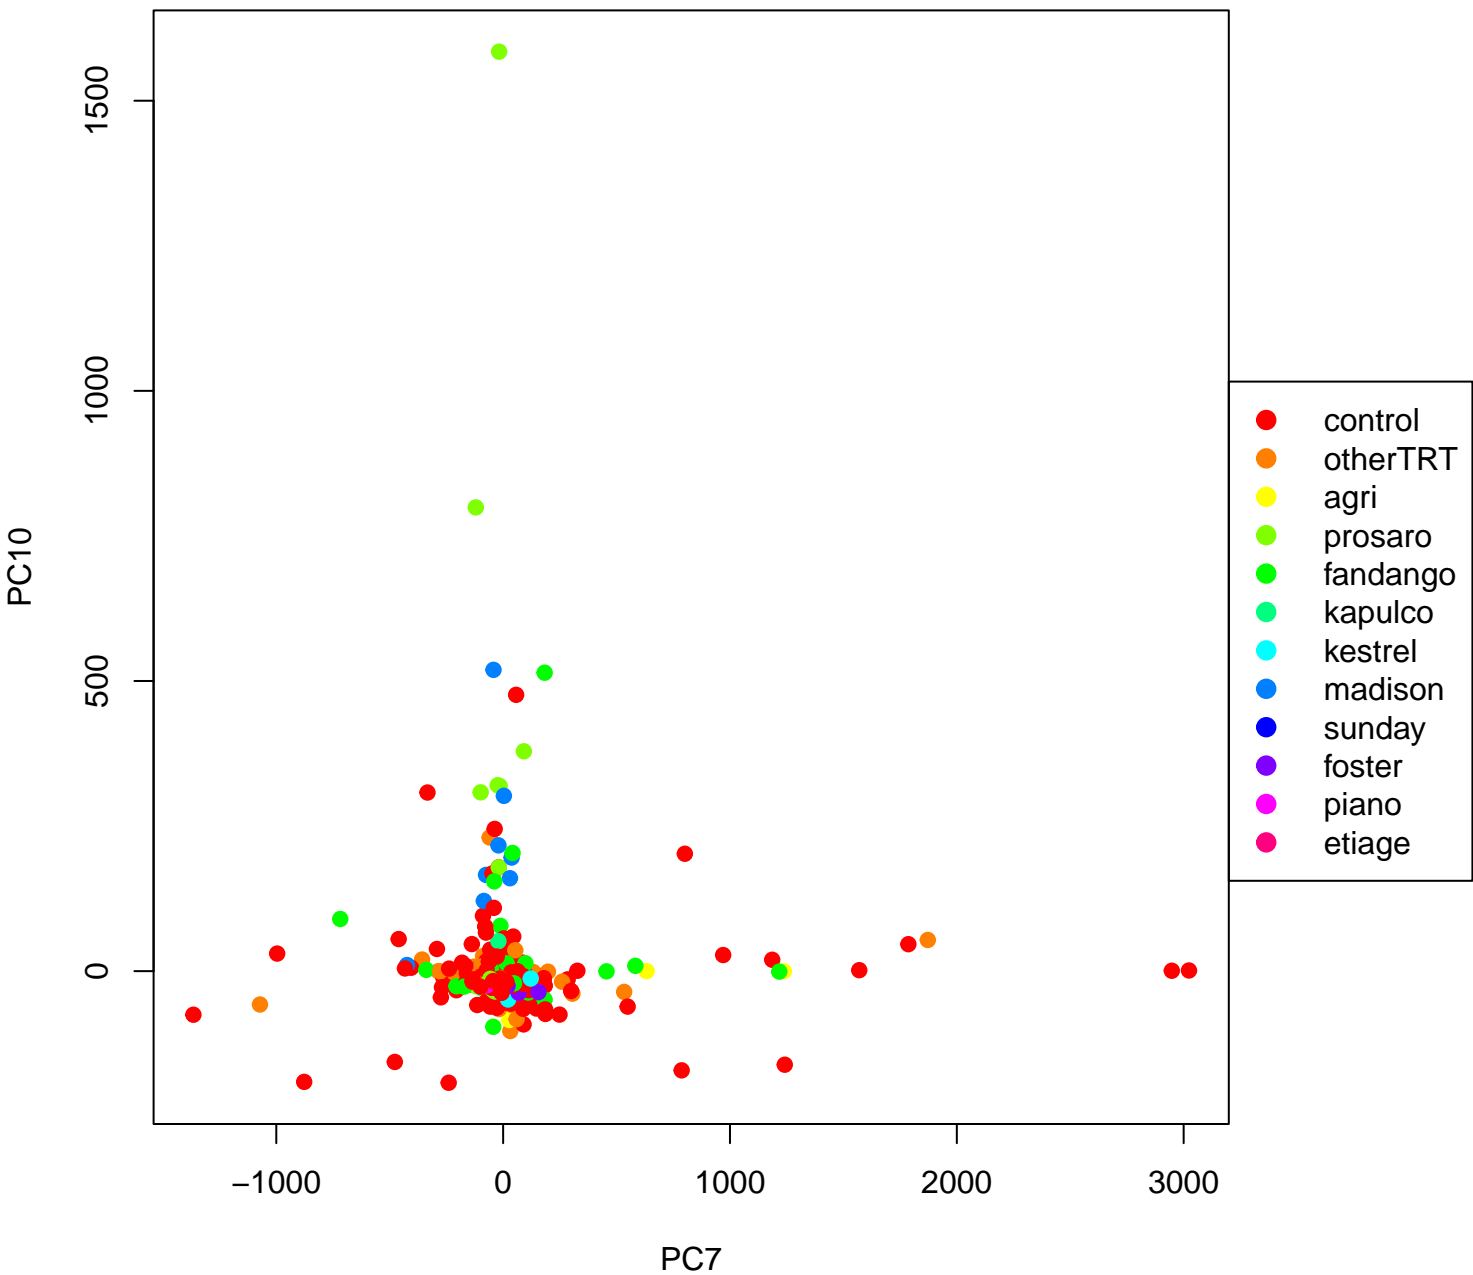

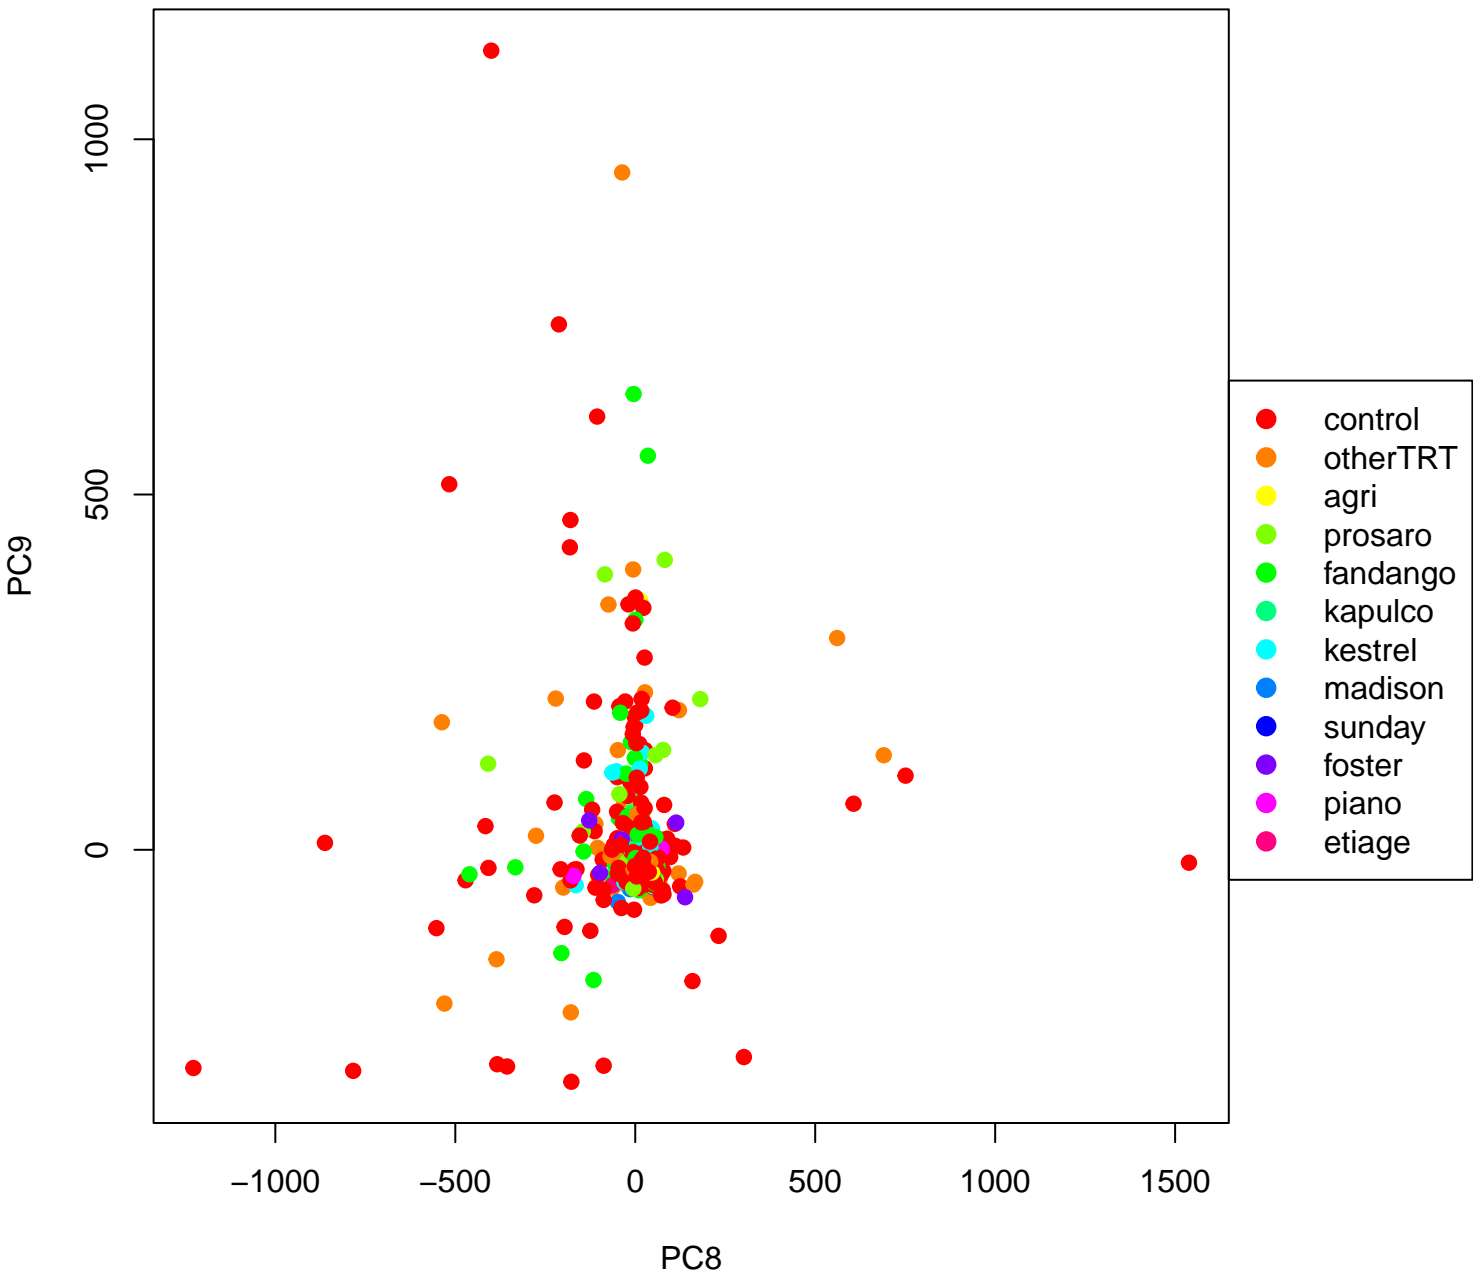

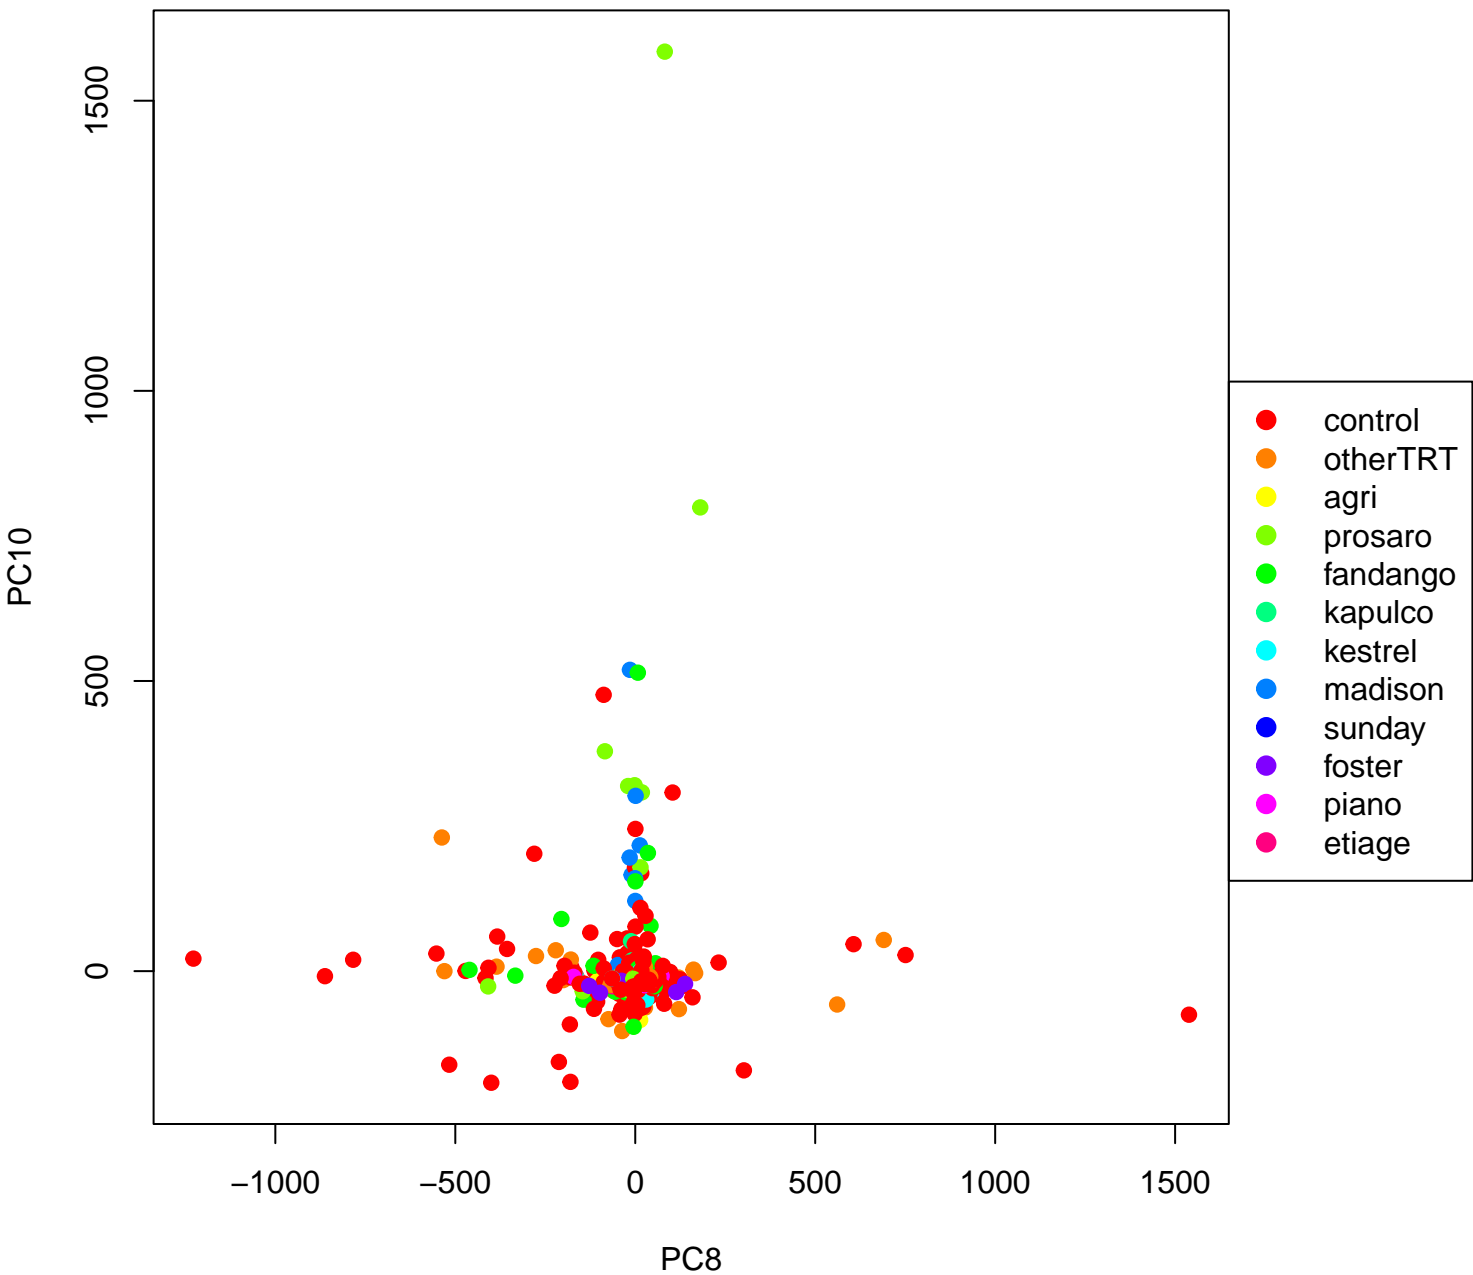

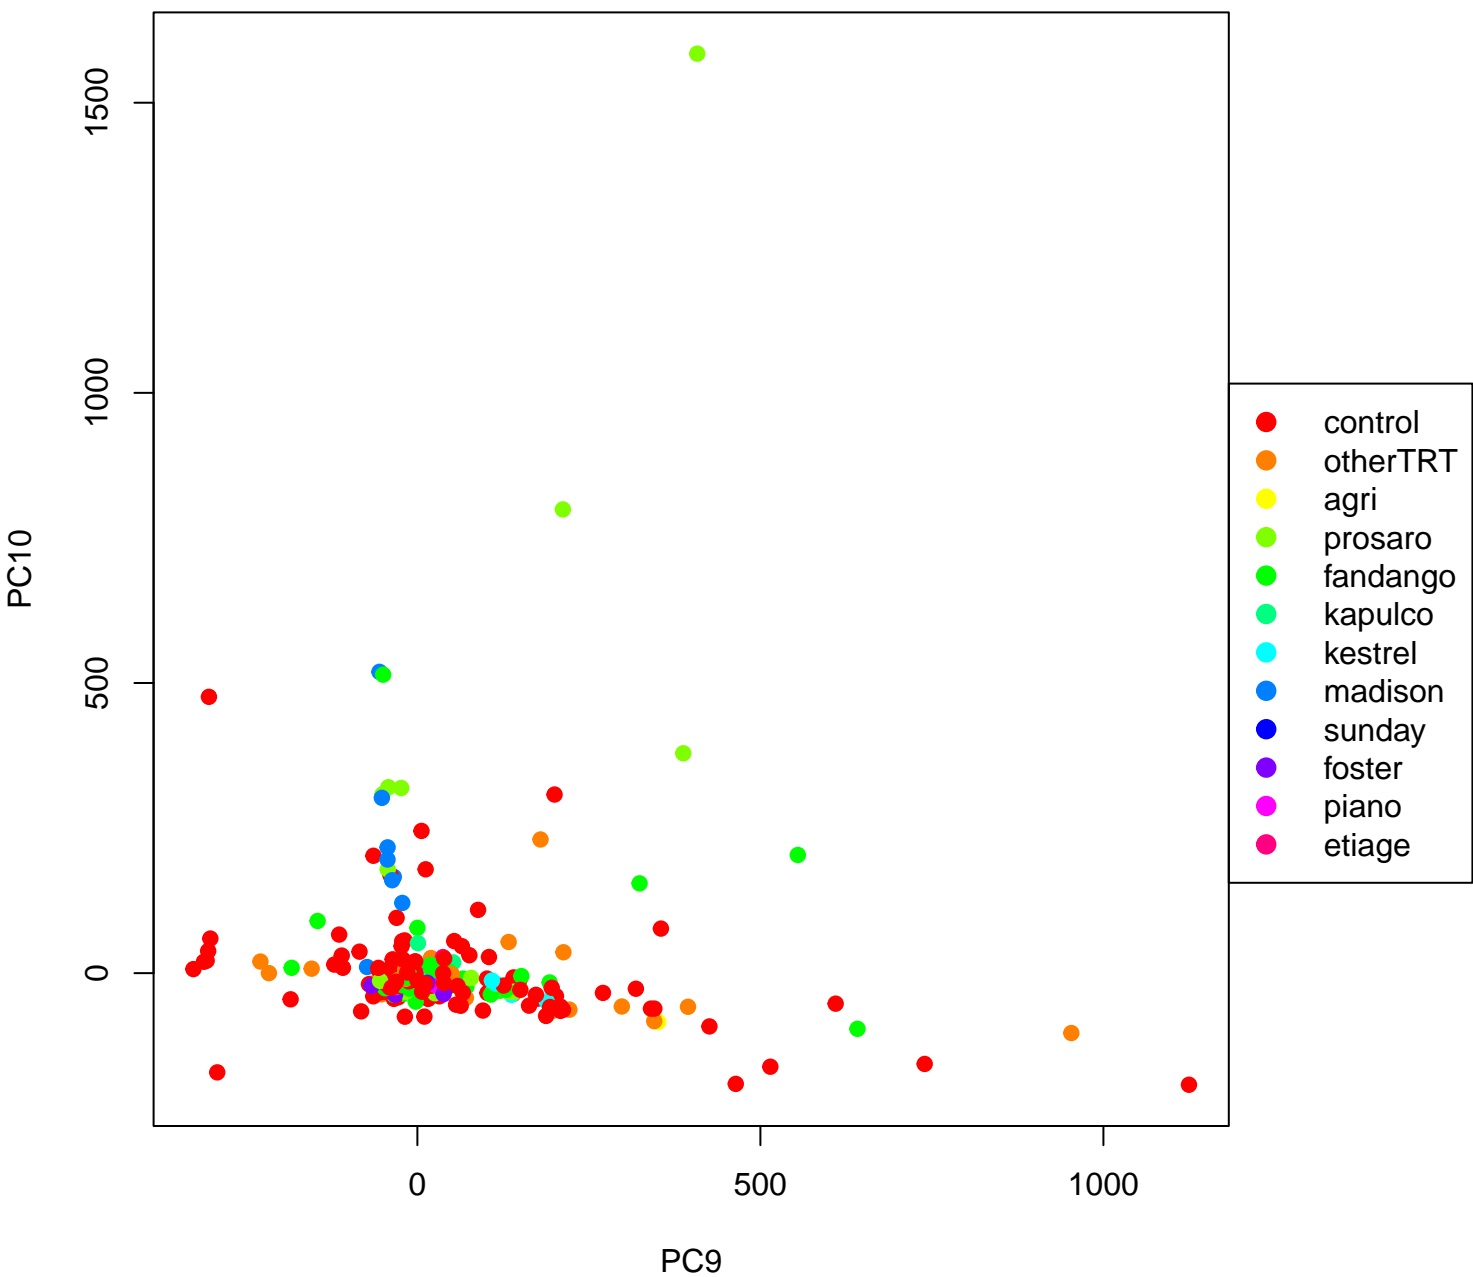

Supplement: s1 [file s1]
